# Supplementary material for: Bio-guided isolation of alpha-glucosidase inhibitory compounds from Vietnamese Garcinia schomburgkiana fruits: in vitro and in silico studies
Source: Royal Society of Chemistry journal article supplement (doi:10.1039/d3ra06760b), 2023-01-01
Supplement: d3ra06760b1.pdf [file d3ra06760b1.pdf]

**Table S1.** <sup>1</sup>H NMR (500 MHz,  $\delta_{\text{H}}$ , multi, ( $J$  in Hz) and <sup>13</sup>C NMR (125 MHz) spectral data of **1** and guttiferone Q

| No. | <i>Epi-guttiferone Q (1)</i><br>(Acetone- $d_6$ )  |                                |                                           | <i>Guttiferone Q</i><br>(Methanol- $d_4$ )                                |                                |
|-----|----------------------------------------------------|--------------------------------|-------------------------------------------|---------------------------------------------------------------------------|--------------------------------|
|     | $\delta_{\text{H}}^{\text{a}}$ , $J$ (Hz)          | $\delta_{\text{C}}^{\text{a}}$ | $\delta_{\text{H}}^{\text{b}}$ , $J$ (Hz) | $\delta_{\text{H}}^{\text{b}}$ , $J$ (Hz)                                 | $\delta_{\text{C}}^{\text{b}}$ |
| 1   |                                                    | 196.7                          |                                           |                                                                           | 196.6                          |
| 2   |                                                    | 118.5                          |                                           |                                                                           | 118.4                          |
| 3   |                                                    | 188.8                          |                                           |                                                                           | 188.4                          |
| 4   | 3.41 ( <i>s</i> )                                  | 65.6                           |                                           | 3.35 ( <i>s</i> )                                                         | 67.7                           |
| 5   |                                                    | 48.8                           |                                           |                                                                           | 48.3                           |
| 6   | 1.63 ( <i>m</i> )                                  | 41.8                           |                                           | 1.78 ( <i>m</i> )                                                         | 42.1                           |
| 7   | 2.32 ( <i>t</i> , $J = 7.5$ )<br>2.01 ( <i>m</i> ) | 43.1                           |                                           | 2.06 ( <i>dd</i> , $J = 13.2$ ,<br>4.0)<br>1.60 ( <i>t</i> , $J = 13.2$ ) | 42.9                           |
| 8   |                                                    | 65.1                           |                                           |                                                                           | 64.9                           |
| 9   |                                                    | 208.2                          |                                           |                                                                           | 208.0                          |
| 10  |                                                    | 198.7                          |                                           |                                                                           | 198.3                          |
| 11  |                                                    | 138.5                          |                                           |                                                                           | 139.5                          |
| 12  | 7.51 ( <i>d</i> , $J = 7.5$ )                      | 129.5                          | 7.57 ( <i>d</i> , $J = 7.5$ )             | 7.56 ( <i>m</i> )                                                         | 129.7                          |
| 13  | 7.43 ( <i>t</i> , $J = 7.5$ )                      | 128.6                          | 7.38 ( <i>t</i> , $J = 7.5$ )             | 7.40 ( <i>t</i> , $J = 7.7$ )                                             | 128.9                          |
| 14  | 7.57 ( <i>t</i> , $J = 7.5$ )                      | 133.1                          | 7.53 ( <i>t</i> , $J = 7.5$ )             | 7.54 <i>m</i>                                                             | 133.3                          |
| 15  | 7.43 ( <i>t</i> , $J = 7.5$ )                      | 128.6                          | 7.38 ( <i>t</i> , $J = 7.5$ )             | 7.40 ( <i>t</i> , $J = 7.7$ )                                             | 128.9                          |
| 16  | 7.51 ( <i>d</i> , $J = 7.5$ )                      | 129.5                          | 7.57 ( <i>d</i> , $J = 7.5$ )             | 7.56 ( <i>m</i> )                                                         | 129.7                          |
| 17  | 1.00 ( <i>s</i> )                                  | 18.2                           | 0.94 ( <i>s</i> )                         | 0.93 ( <i>s</i> )                                                         | 18.4                           |
| 18  | 1.70 ( <i>m</i> )<br>1.47 ( <i>m</i> )             | 39.3                           |                                           | 1.67 ( <i>m</i> )<br>1.46 ( <i>td</i> , $J = 12.8$ ,<br>4.1)              | 39.8                           |
| 19  | 2.42 ( <i>m</i> )<br>2.02 ( <i>m</i> )             | 22.7                           |                                           | 2.36 ( <i>m</i> )<br>2.06 ( <i>m</i> )                                    | 23.0                           |
| 20  | 5.14 ( <i>m</i> )                                  | 125.2                          | 5.09 ( <i>m</i> )                         | 5.12 ( <i>brt</i> , $J = 7.0$ )                                           | 125.4                          |
| 21  |                                                    | 132.0                          |                                           | –                                                                         | 132.5                          |
| 22  | 1.67 ( <i>s</i> )                                  | 17.8                           | 1.57 ( <i>s</i> )                         | 1.66 ( <i>s</i> )                                                         | 18.2                           |
| 23  | 1.68 ( <i>s</i> )                                  | 25.9                           | 1.63 ( <i>s</i> )                         | 1.73 ( <i>s</i> )                                                         | 26.0                           |
| 24  | 2.20 ( <i>m</i> )<br>1.65 ( <i>m</i> )             | 28.8                           |                                           | 2.20 ( <i>m</i> )<br>1.70 ( <i>m</i> )                                    | 29.1                           |
| 25  | 4.99 ( <i>m</i> )                                  | 123.4                          | 5.01 ( <i>m</i> )                         | 5.05 ( <i>brt</i> , $J = 6.5$ )                                           | 123.6                          |
| 26  |                                                    | 133.7                          |                                           | –                                                                         | 134.4                          |
| 27  | 1.56 ( <i>s</i> )                                  | 18.0                           | 1.61 ( <i>s</i> )                         | 1.60 ( <i>s</i> )                                                         | 17.8                           |
| 28  | 1.63 ( <i>s</i> )                                  | 25.9                           | 1.67 ( <i>s</i> )                         | 1.69 ( <i>s</i> )                                                         | 25.9                           |
| 29  | 2.49 ( <i>m</i> )<br>2.34 ( <i>m</i> )             | 31.1                           |                                           | 2.42 ( <i>m</i> )                                                         | 31.1                           |
| 30  | 5.23 ( <i>m</i> )                                  | 121.0                          | 5.16 ( <i>m</i> )                         | 5.18 ( <i>br t</i> , $J = 7.3$ )                                          | 121.1                          |

|                                                                                             |                   |       |                   |                   |       |
|---------------------------------------------------------------------------------------------|-------------------|-------|-------------------|-------------------|-------|
| 31                                                                                          |                   | 134.7 |                   | –                 | 135.2 |
| 32                                                                                          | 1.62 ( <i>s</i> ) | 18.1  | 1.66 ( <i>s</i> ) | 1.65 ( <i>s</i> ) | 18.0  |
| 33                                                                                          | 1.74 ( <i>s</i> ) | 26.2  | 1.71 ( <i>s</i> ) | 1.70 ( <i>s</i> ) | 26.2  |
| <sup>a</sup> acetone- <i>d</i> <sub>6</sub><br><sup>b</sup> methanol- <i>d</i> <sub>4</sub> |                   |       |                   |                   |       |

**Table S2.** <sup>1</sup>H NMR (500 MHz, δ<sub>H</sub>, multi, (*J* in Hz) and <sup>13</sup>C NMR (125 MHz) data of compounds **1** and **2** in acetone-*d*<sub>6</sub>.

| No. | <b>1</b><br>(acetone- <i>d</i> <sub>6</sub> )          |                      | <b>2</b><br>(acetone- <i>d</i> <sub>6</sub> )  |                      |
|-----|--------------------------------------------------------|----------------------|------------------------------------------------|----------------------|
|     | δ <sub>H</sub> (ppm), <i>J</i> (Hz)                    | δ <sub>C</sub> (ppm) | δ <sub>H</sub> (ppm), <i>J</i> (Hz)            | δ <sub>C</sub> (ppm) |
| 1   | –                                                      | 196.7                | –                                              | 206.3                |
| 2   | –                                                      | 118.5                | –                                              | 69.9                 |
| 3   | –                                                      | 188.8                | –                                              | 43.4                 |
| 4   | 3.41 ( <i>s</i> )                                      | 65.6                 | –                                              | 43.3                 |
| 5   | –                                                      | 48.8                 | –                                              | 43.1                 |
| 6   | 1.63 ( <i>m</i> )                                      | 41.8                 | –                                              | 62.8                 |
| 7   | 2.32 ( <i>t</i> , <i>J</i> = 7.5)<br>2.01 ( <i>m</i> ) | 43.1                 | –                                              | 195.2                |
| 8   | –                                                      | 65.1                 | –                                              | 121.0                |
| 9   | –                                                      | 208.2                | –                                              | 191.8                |
| 10  | –                                                      | 198.7                | 2.76 ( <i>m</i> , 1H)<br>2.57 ( <i>m</i> , 1H) | 26.2                 |
| 11  | –                                                      | 138.5                | 4.92 ( <i>m</i> , 1H)                          | 121.0                |
| 12  | 7.51 ( <i>d</i> , <i>J</i> = 7.5)                      | 129.5                | –                                              | 134.9                |
| 13  | 7.43 ( <i>t</i> , <i>J</i> = 7.5)                      | 128.6                | 1.64 ( <i>s</i> , 3H)                          | 18.2                 |
| 14  | 7.57 ( <i>t</i> , <i>J</i> = 7.5)                      | 133.1                | 1.64 ( <i>s</i> , 3H)                          | 26.2                 |
| 15  | 7.43 ( <i>t</i> , <i>J</i> = 7.5)                      | 128.6                | 0.86 ( <i>s</i> , 3H)                          | 14.3                 |
| 16  | 7.51 ( <i>d</i> , <i>J</i> = 7.5)                      | 129.5                | –                                              | 37.1                 |
| 17  | 1.00 ( <i>s</i> )                                      | 18.2                 | –                                              | 24.5                 |
| 18  | 1.70 ( <i>m</i> )<br>1.47 ( <i>m</i> )                 | 39.3                 | 4.99 ( <i>s</i> , 1H)                          | 125.2                |
| 19  | 2.42 ( <i>m</i> )<br>2.02 ( <i>m</i> )                 | 22.7                 | –                                              | 133.0                |
| 20  | 5.14 ( <i>br s</i> )                                   | 125.2                | 1.70 ( <i>s</i> , 3H)                          | 17.8                 |
| 21  | –                                                      | 132.0                | 1.56 ( <i>s</i> , 3H)                          | 25.6                 |
| 22  | 1.67 ( <i>s</i> )                                      | 17.8                 | –                                              | 30.4                 |
| 23  | 1.68 ( <i>s</i> )                                      | 25.9                 | 5.08 ( <i>m</i> , 1H)                          | 123.5                |
| 24  | 2.20 ( <i>m</i> )<br>1.65 ( <i>m</i> )                 | 28.8                 | –                                              | 132.1                |

|    |                                        |       |                                   |       |
|----|----------------------------------------|-------|-----------------------------------|-------|
| 25 | 4.99 ( <i>br s</i> )                   | 123.4 | 1.69 ( <i>s</i> , 3H)             | 25.8  |
| 26 | –                                      | 133.7 | 1.59 ( <i>s</i> , 3H)             | 18.1  |
| 27 | 1.56 ( <i>s</i> )                      | 18.0  | –                                 | 198.6 |
| 28 | 1.63 ( <i>s</i> )                      | 25.9  | –                                 | 138.3 |
| 29 | 2.49 ( <i>m</i> )<br>2.34 ( <i>m</i> ) | 31.1  | 7.51 ( <i>d</i> , $J = 7.5$ , 1H) | 130.5 |
| 30 | 5.23 ( <i>br s</i> )                   | 121.0 | 7.42 ( <i>t</i> , $J = 7.5$ , 1H) | 129.6 |
| 31 | –                                      | 134.7 | 7.57 ( <i>t</i> , $J = 7.5$ , 1H) | 133.3 |
| 32 | 1.62 ( <i>s</i> )                      | 18.1  | 7.42 ( <i>t</i> , $J = 7.5$ , 1H) | 129.6 |
| 33 | 1.74 ( <i>s</i> )                      | 26.2  | 7.51 ( <i>d</i> , $J = 7.5$ , 1H) | 130.5 |

**Table S3.**  $^1\text{H}$  NMR (500 MHz,  $\delta_{\text{H}}$ , multi, ( $J$  in Hz) and  $^{13}\text{C}$  NMR (125 MHz) spectral data comparison of compound **3** in acetone- $d_6$ .

| No. | <b>3</b><br>(acetone- $d_6$ )                             |                           | <b>Guttiferone K</b><br>(methanol- $d_4$ )                                   |                           |
|-----|-----------------------------------------------------------|---------------------------|------------------------------------------------------------------------------|---------------------------|
|     | $\delta_{\text{H}}$ (ppm), $J$ (Hz)                       | $\delta_{\text{C}}$ (ppm) | $\delta_{\text{H}}$ (ppm), $J$ (Hz)                                          | $\delta_{\text{C}}$ (ppm) |
| 1   | –                                                         | 196.9                     | –                                                                            | 196.7                     |
| 2   | –                                                         | 117.8                     | –                                                                            | 119.9                     |
| 3   | –                                                         | 191.9                     | –                                                                            | 191.0                     |
| 4   | –                                                         | 68.0                      | –                                                                            | 69.4                      |
| 5   | –                                                         | 51.3                      | –                                                                            | 51.6                      |
| 6   | 1.60 ( <i>m</i> )                                         | 40.3                      | 1.75 ( <i>m</i> )                                                            | 42.0                      |
| 7   | 2.07 ( <i>m</i> )<br>1.44 ( <i>m</i> )                    | 42.8                      | 2.03 ( <i>dd</i> , $J = 13.3$ , 3.3)<br>1.44 ( <i>dd</i> , $J = 13.3$ , 3.3) | 43.2                      |
| 8   | –                                                         | 65.1                      | –                                                                            | 64.1                      |
| 9   | –                                                         | 207.9                     | –                                                                            | 209.2                     |
| 10  | –                                                         | 196.5                     | –                                                                            | 196.7                     |
| 11  | –                                                         | 129.8                     | –                                                                            | 130.3                     |
| 12  | 7.19 ( <i>d</i> , $J = 2.0$ )                             | 117.4                     | 7.20 ( <i>d</i> , $J = 2.1$ )                                                | 117.4                     |
| 13  | –                                                         | 151.3                     | –                                                                            | 146.5                     |
| 14  | –                                                         | 145.4                     | –                                                                            | 152.6                     |
| 15  | 6.80 ( <i>d</i> , $J = 8.0$ )                             | 114.9                     | 6.69 ( <i>d</i> , $J = 8.4$ )                                                | 115.3                     |
| 16  | 7.01 ( <i>dd</i> , $J = 8.5$ , 2.0)                       | 124.6                     | 6.95 ( <i>dd</i> , $J = 8.4$ , 2.1)                                          | 125.1                     |
| 17  | 2.79 ( <i>dd</i> , $J = 14.5$ , 8.5)<br>2.68 ( <i>m</i> ) | 26.5                      | 2.73 ( <i>dd</i> , $J = 13.0$ , 7.8)<br>2.65 ( <i>dd</i> , $J = 13.0$ , 4.3) | 26.7                      |
| 18  | 4.92 ( <i>m</i> )                                         | 121.4                     | 4.88 ( <i>m</i> )                                                            | 121.5                     |
| 19  | –                                                         | 134.2                     | –                                                                            | 135.2                     |
| 20  | 1.70 ( <i>s</i> )                                         | 18.3                      | 1.69 ( <i>s</i> )                                                            | 18.5                      |
| 21  | 1.66 ( <i>s</i> )                                         | 25.9                      | 1.62 ( <i>s</i> )                                                            | 26.4                      |
| 22  | 0.86 ( <i>s</i> )                                         | 17.8                      | 0.81 ( <i>s</i> )                                                            | 16.4                      |

|    |                                        |       |                                                                                       |       |
|----|----------------------------------------|-------|---------------------------------------------------------------------------------------|-------|
| 23 | 1.81 ( <i>m</i> )<br>1.77 ( <i>m</i> ) | 36.9  | 1.68 ( <i>m</i> )                                                                     | 37.6  |
| 24 | 2.12 ( <i>m</i> )<br>1.99 ( <i>m</i> ) | 25.0  | 2.07 ( <i>m</i> )<br>1.77 ( <i>m</i> )                                                | 30.2  |
| 25 | 5.01 ( <i>br t</i> , <i>J</i> = 6.8)   | 125.4 | 5.00 ( <i>br t</i> , <i>J</i> = 7.0)                                                  | 123.7 |
| 26 | –                                      | 131.9 | –                                                                                     | 134.7 |
| 27 | 1.66 ( <i>s</i> )                      | 18.2  | 1.67 ( <i>s</i> )                                                                     | 18.3  |
| 28 | 1.60 ( <i>s</i> )                      | 25.9  | 1.57 ( <i>s</i> )                                                                     | 26.0  |
| 29 | 2.55 ( <i>m</i> )<br>2.45 ( <i>m</i> ) | 31.4  | 2.51 ( <i>dd</i> , <i>J</i> = 14.5, 8.8)<br>2.44, ( <i>dd</i> , <i>J</i> = 14.5, 8.8) | 31.8  |
| 30 | 5.09 ( <i>br t</i> , <i>J</i> = 6.0)   | 120.9 | 5.10 ( <i>br t</i> , <i>J</i> = 7.1)                                                  | 121.1 |
| 31 | –                                      | 134.7 | –                                                                                     | 135.7 |
| 32 | 1.67 ( <i>s</i> )                      | 18.1  | 1.67 ( <i>s</i> )                                                                     | 18.4  |
| 33 | 1.70 ( <i>s</i> )                      | 26.2  | 1.71 ( <i>s</i> )                                                                     | 26.4  |
| 34 | 1.99 ( <i>m</i> )                      | 26.4  | 1.97 ( <i>m</i> )                                                                     | 25.3  |
| 35 | 5.18 ( <i>br t</i> , <i>J</i> = 7.0)   | 123.5 | 5.04 ( <i>br t</i> , <i>J</i> = 6.9)                                                  | 125.6 |
| 36 | –                                      | 133.8 | –                                                                                     | 132.7 |
| 37 | 1.66 ( <i>s</i> )                      | 25.9  | 1.66 ( <i>s</i> )                                                                     | 26.1  |
| 38 | 1.57 ( <i>s</i> )                      | 18.1  | 1.59 ( <i>s</i> )                                                                     | 18.0  |

**Table S4.** <sup>1</sup>H NMR (500 MHz, δ<sub>H</sub>, multi, (*J* in Hz) and <sup>13</sup>C NMR (125 MHz) data of compound **4** in acetone-*d*<sub>6</sub>.

| No.        | <b>4</b><br>(acetone- <i>d</i> <sub>6</sub> ) |                      | <b>Hypersampsonse I</b><br>(pyridine- <i>d</i> <sub>5</sub> ) |                      |
|------------|-----------------------------------------------|----------------------|---------------------------------------------------------------|----------------------|
|            | δ <sub>H</sub> (ppm), <i>J</i> (Hz)           | δ <sub>C</sub> (ppm) | δ <sub>H</sub> (ppm), <i>J</i> (Hz)                           | δ <sub>C</sub> (ppm) |
| 1          | –                                             | 81.3                 | –                                                             | 81.9                 |
| 2          | –                                             | 206.1                | –                                                             | 205.8                |
| 3          | –                                             | 70.8                 | –                                                             | 76.6                 |
| 4 $\alpha$ | 2.52 ( <i>m</i> )                             | 29.2                 | 2.72 ( <i>m</i> )                                             | 29.0                 |
| 4 $\beta$  | 2.32 ( <i>m</i> )                             |                      | 2.56 ( <i>ddd</i> , <i>J</i> = 14.1, 9.4, 3.9)                |                      |
| 5 $\alpha$ | 1.82 ( <i>m</i> )                             | 42.2                 | 1.78<br>(over load)                                           | 41.8                 |
| 5 $\beta$  |                                               |                      | 2.00 ( <i>m</i> )                                             |                      |
| 6          | –                                             | 44.6                 | –                                                             | 44.3                 |
| 7          | 2.09 ( <i>m</i> )                             | 58.3                 | 2.20 ( <i>m</i> )                                             | 58.0                 |
| 8 $\alpha$ | 2.32 ( <i>m</i> )                             | 29.3                 | 2.25 ( <i>m</i> )                                             | 28.9                 |
| 8 $\beta$  | 1.80 ( <i>m</i> )                             |                      | 1.55<br>(over load)                                           |                      |
| 9          | 2.40 ( <i>m</i> )                             | 43.9                 | 2.14 ( <i>m</i> )                                             | 43.5                 |
| 10a        | 2.63 ( <i>m</i> )                             | 45.2                 | 2.65 ( <i>dd</i> , <i>J</i> = 13.9, 6.1)                      | 45.1                 |

|     |                                          |       |                                          |       |
|-----|------------------------------------------|-------|------------------------------------------|-------|
| 10b | 1.99 ( <i>m</i> )                        |       | 1.98 ( <i>m</i> )                        |       |
| 11  | –                                        | 69.3  | –                                        | 69.1  |
| 12  | –                                        | 206.4 | –                                        | 206.1 |
| 13  | –                                        | 51.2  | –                                        | 51.9  |
| 14  | –                                        | 206.1 | –                                        | 205.9 |
| 15  | –                                        | 193.4 | –                                        | 193.7 |
| 16  | –                                        | 134.7 | –                                        | 135.6 |
| 17  | 7.18 ( <i>d</i> , <i>J</i> = 8.0)        | 129.8 | 7.54 ( <i>br d</i> , <i>J</i> = 7.8)     | 129.8 |
| 18  | 7.36 ( <i>dd</i> , <i>J</i> = 16.0, 8.0) | 128.7 | 7.37 ( <i>m</i> )                        | 128.5 |
| 19  | 7.47 ( <i>t</i> , <i>J</i> = 7.0)        | 132.7 | 7.40 ( <i>m</i> )                        | 132.5 |
| 20  | 7.36 ( <i>dd</i> , <i>J</i> = 16.0, 8.0) | 128.7 | 7.37 ( <i>m</i> )                        | 128.5 |
| 21  | 7.18 ( <i>d</i> , <i>J</i> = 8.0)        | 129.8 | 7.54 ( <i>br d</i> , <i>J</i> = 7.8)     | 129.8 |
| 22  | 0.92 ( <i>s</i> )                        | 22.0  | 0.95 ( <i>s</i> )                        | 21.8  |
| 23  | 1.03 ( <i>s</i> )                        | 30.3  | 0.92 ( <i>s</i> )                        | 29.9  |
| 24a | 2.63 ( <i>m</i> )                        | 30.4  | 2.86 ( <i>dd</i> , <i>J</i> = 14.5, 7.8) | 30.4  |
| 24b | 2.53 ( <i>m</i> )                        |       | 2.74 ( <i>m</i> )                        |       |
| 25  | 5.16 ( <i>m</i> )                        | 120.5 | 5.42 ( <i>t</i> , <i>J</i> = 6.5)        | 120.2 |
| 26  | –                                        | 138.2 | –                                        | 138.1 |
| 27  | 2.07 ( <i>m</i> )                        | 40.6  | 2.07 ( <i>m</i> )                        | 40.3  |
| 28  | 1.68 ( <i>s</i> )                        | 16.5  | 1.77 ( <i>s</i> )                        | 16.6  |
| 29  | 2.07 ( <i>m</i> )                        | 27.2  | 2.12 ( <i>m</i> )                        | 26.9  |
| 30  | 5.08 ( <i>d</i> , <i>J</i> = 7.5)        | 124.9 | 5.17 ( <i>br t</i> , <i>J</i> = 7.4)     | 124.6 |
| 31  | –                                        | 132.0 | –                                        | 131.4 |
| 32  | 1.64 ( <i>s</i> )                        | 25.4  | 1.66 ( <i>s</i> )                        | 25.8  |
| 33  | 1.58 ( <i>s</i> )                        | 17.7  | 1.56 ( <i>s</i> )                        | 17.7  |
| 34  | 1.44 ( <i>s</i> )                        | 25.4  | 1.58 ( <i>s</i> )                        | 25.7  |
| 35  | 1.48 ( <i>s</i> )                        | 22.8  | 1.62 ( <i>s</i> )                        | 22.8  |

**Table S5.** <sup>1</sup>H NMR (400 MHz, δ<sub>H</sub>, multi, (*J* in Hz) and <sup>13</sup>C NMR (100 MHz) spectral data comparison of compound **5** in CDCl<sub>3</sub>.

| No. | <b>5</b><br>(CDCl <sub>3</sub> )    |                      | <b>Sampsonione D</b><br>(CDCl <sub>3</sub> ) |                      |
|-----|-------------------------------------|----------------------|----------------------------------------------|----------------------|
|     | δ <sub>H</sub> (ppm), <i>J</i> (Hz) | δ <sub>C</sub> (ppm) | δ <sub>H</sub> (ppm), <i>J</i> (Hz)          | δ <sub>C</sub> (ppm) |
| 1   | –                                   | 80.8                 | –                                            | 80.8                 |
| 2   | –                                   | 203.8                | –                                            | 203.9                |
| 3   | –                                   | 73.9                 | –                                            | 73.9                 |
| 4α  | 2.64 (1H, <i>m</i> )                | 34.3                 | 2.63 (1H, <i>t</i> , <i>J</i> = 12.6)        | 34.4                 |
| 4β  | 2.06 (1H, <i>m</i> )                |                      | 2.08 (1H, <i>dd</i> , <i>J</i> = 12.4, 8.8)  |                      |
| 5β  | 3.15 (1H, <i>m</i> )                | 54.9                 | 3.12 (1H, <i>dd</i> , <i>J</i> = 12.0, 8.9)  | 54.9                 |
| 6   | –                                   | 44.2                 | –                                            | 44.3                 |
| 7α  | 2.03 (1H, <i>m</i> )                | 57.1                 | 2.03 (1H, <i>m</i> )                         | 57.2                 |

|            |                                      |       |                                             |       |
|------------|--------------------------------------|-------|---------------------------------------------|-------|
| 8 $\alpha$ | 2.29 (1H, <i>m</i> )                 | 28.8  | 2.28 (1H, <i>m</i> )                        | 28.9  |
| 8 $\beta$  | 1.71 (1H, <i>m</i> )                 |       | 1.71 (1H, <i>m</i> )                        |       |
| 9 $\alpha$ | 2.10-2.12 (1H, <i>m</i> )            | 43.8  | 2.13 (1H, <i>m</i> )                        | 43.9  |
| 10a        | 2.52 (1H, <i>m</i> )                 | 42.5  | 2.52 (1H, <i>dd</i> , <i>J</i> = 14.0, 8.6) | 42.6  |
| 10b        | 1.89 (1H, <i>m</i> )                 |       | 1.88 (1H, <i>d</i> , <i>J</i> = 14.1)       |       |
| 11         | –                                    | 68.8  | –                                           | 68.9  |
| 12         | –                                    | 204.7 | –                                           | 204.7 |
| 13         | –                                    | 50.6  | –                                           | 50.7  |
| 14         | –                                    | 206.2 | –                                           | 206.2 |
| 15         | –                                    | 192.4 | –                                           | 192.4 |
| 16         | –                                    | 134.8 | –                                           | 134.8 |
| 17         | 7.12 (1H, <i>d</i> , <i>J</i> = 8.0) | 128.8 | 7.11 (1H, <i>d</i> , <i>J</i> = 7.7)        | 128.8 |
| 18         | 7.26 (1H, <i>t</i> , <i>J</i> = 7.8) | 127.9 | 7.26 (1H, <i>t</i> , <i>J</i> = 7.9)        | 127.9 |
| 19         | 7.39 (1H, <i>t</i> , <i>J</i> = 7.4) | 131.9 | 7.39 (1H, <i>t</i> , <i>J</i> = 7.7)        | 131.3 |
| 20         | 7.26 (1H, <i>t</i> , <i>J</i> = 7.8) | 127.9 | 7.26 (1H, <i>t</i> , <i>J</i> = 7.9)        | 127.9 |
| 21         | 7.12 (1H, <i>d</i> , <i>J</i> = 8.0) | 128.8 | 7.11 (1H, <i>d</i> , <i>J</i> = 7.7)        | 128.8 |
| 22         | –                                    | 145.2 | –                                           | 145.2 |
| 23         | 4.91 (1H, <i>s</i> )                 | 111.7 | 4.91 (1H, <i>s</i> )                        | 111.8 |
|            | 4.84 (1H, <i>s</i> )                 |       | 4.84 (1H, <i>s</i> )                        |       |
| 24         | 1.80 (3H, <i>s</i> )                 | 23.7  | 1.80 (3H, <i>s</i> )                        | 23.8  |
| 25         | 0.87 (3H, <i>s</i> )                 | 26.7  | 0.86 (3H, <i>s</i> )                        | 26.7  |
| 26         | 0.93 (3H, <i>s</i> )                 | 27.0  | 0.93 (3H, <i>s</i> )                        | 27.0  |
| 27         | 2.16 (2H, <i>m</i> )                 | 29.3  | nd                                          | 29.3  |
| 28         | 5.11 (1H, <i>t</i> , <i>J</i> = 7.0) | 118.9 | 5.11 (1H, <i>t</i> , <i>J</i> = 5.7)        | 118.9 |
| 29         | –                                    | 138.2 | –                                           | 138.3 |
| 30         | 1.95 (2H, <i>m</i> )                 | 39.8  | 1.98 (2H, <i>m</i> )                        | 39.5  |
| 31         | 1.66 (3H, <i>s</i> )                 | 16.3  | 1.66 (3H, <i>s</i> )                        | 16.3  |
| 32         | 2.03 (2H, <i>m</i> )                 | 26.5  | 2.03 (2H, <i>m</i> )                        | 26.5  |
| 33         | 5.05 (1H, <i>t</i> , <i>J</i> = 6.8) | 124.0 | 5.05 (1H, <i>t</i> , <i>J</i> = 4.3)        | 124.0 |
| 34         | –                                    | 131.2 | –                                           | 131.3 |
| 35         | 1.65 (3H, <i>s</i> )                 | 25.6  | 1.65 (3H, <i>s</i> )                        | 25.6  |
| 36         | 1.57 (3H, <i>s</i> )                 | 17.5  | 1.57 (3H, <i>s</i> )                        | 17.6  |
| 37         | 1.41 (3H, <i>s</i> )                 | 22.7  | 1.40 (3H, <i>s</i> )                        | 22.7  |
| 38         | 1.46 (3H, <i>s</i> )                 | 25.1  | 1.46 (3H, <i>s</i> )                        | 25.2  |

**Table S6.**  $^1\text{H}$  NMR (400 MHz,  $\delta_{\text{H}}$ , multi, (*J* in Hz) and  $^{13}\text{C}$  NMR (100 MHz) data of compound **6** in  $\text{CDCl}_3$ .

| No.        | 6<br>(CDCl <sub>3</sub> )            |                           | Sampsonione H<br>(CDCl <sub>3</sub> ) |                           |
|------------|--------------------------------------|---------------------------|---------------------------------------|---------------------------|
|            | $\delta_{\text{H}}$ (ppm), $J$ (Hz)  | $\delta_{\text{C}}$ (ppm) | $\delta_{\text{H}}$ (ppm), $J$ (Hz)   | $\delta_{\text{C}}$ (ppm) |
| 1          | –                                    | 79.7                      | –                                     | 81.1                      |
| 2          | –                                    | 203.8                     | –                                     | 203.3                     |
| 3          | –                                    | 75.1                      | –                                     | 74.8                      |
| 4 $\alpha$ | 2.37 ( <i>dd</i> , $J = 11.4, 7.6$ ) | 28.2                      | 2.37 ( <i>dd</i> , $J = 13.7, 6.7$ )  | 27.9                      |
| 4 $\beta$  | 2.43 ( <i>m</i> )                    |                           | 2.43 ( <i>dd</i> , $J = 13.7, 7.0$ )  |                           |
| 5 $\alpha$ | 1.75 ( <i>m</i> )                    | 42.7                      | 1.72 ( <i>m</i> )                     | 42.4                      |
| 5 $\beta$  | 1.75 ( <i>m</i> )                    |                           | 1.72 ( <i>m</i> )                     |                           |
| 6          | –                                    | 44.5                      | –                                     | 44.2                      |
| 7          | 1.95 ( <i>m</i> )                    | 55.6                      | 1.92 ( <i>m</i> )                     | 55.3                      |
| 8 $\alpha$ | 1.92 ( <i>m</i> )                    | 23.8                      | 1.92 ( <i>m</i> )                     | 23.5                      |
| 8 $\beta$  | 1.75 ( <i>m</i> )                    |                           | 1.72 ( <i>m</i> )                     |                           |
| 9          | 2.10 ( <i>m</i> )                    | 42.5                      | 2.07 ( <i>m</i> )                     | 42.2                      |
| 10a        | 2.50 ( <i>dd</i> , $J = 10.8, 7.2$ ) | 35.3                      | 2.50 ( <i>dd</i> , $J = 14.4, 5.3$ )  | 35.0                      |
| 10b        | 2.21 ( <i>d</i> , $J = 16.4$ )       |                           | 2.21 ( <i>d</i> , $J = 14.8$ )        |                           |
| 11         | –                                    | 67.7                      | –                                     | 67.5                      |
| 12         | –                                    | 207.5                     | –                                     | 204.8                     |
| 13         | –                                    | 47.8                      | –                                     | 47.5                      |
| 14         | –                                    | 203.8                     | –                                     | 203.3                     |
| 15         | –                                    | 193.4                     | –                                     | 192.9                     |
| 16         | –                                    | 135.2                     | –                                     | 134.8                     |
| 17         | 7.06 ( <i>d</i> , $J = 7.2$ )        | 128.7                     | 7.10 ( <i>d</i> , $J = 8.0$ )         | 128.4                     |
| 18         | 7.26 ( <i>dd</i> , $J = 12.4, 8.8$ ) | 128.4                     | 7.27 ( <i>dd</i> , $J = 7.9, 7.0$ )   | 128.1                     |
| 19         | 7.38 ( <i>t</i> , $J = 7.6$ )        | 132.3                     | 7.39 ( <i>t</i> , $J = 7.0$ )         | 132.1                     |
| 20         | 7.26 ( <i>dd</i> , $J = 12.4, 8.8$ ) | 128.4                     | 7.27 ( <i>dd</i> , $J = 7.9, 7.0$ )   | 128.1                     |
| 21         | 7.06 ( <i>d</i> , $J = 7.2$ )        | 128.7                     | 7.10 ( <i>d</i> , $J = 8.0$ )         | 128.4                     |
| 22         | 1.01 ( <i>s</i> )                    | 28.6                      | 1.03 ( <i>s</i> )                     | 28.3                      |
| 23         | 0.94 ( <i>s</i> )                    | 20.7                      | 0.95 ( <i>s</i> )                     | 20.5                      |
| 24a        | 2.61 ( <i>m</i> )                    | 29.1                      | 2.62 ( <i>m</i> )                     | 28.9                      |
| 24b        | 2.61 ( <i>m</i> )                    |                           | 2.62 ( <i>m</i> )                     |                           |
| 25         | 5.30 ( <i>t</i> , $J = 8.0$ )        | 119.2                     | 5.30 ( <i>t</i> , $J = 7.4$ )         | 118.9                     |
| 26         | –                                    | 139.1                     | –                                     | 138.8                     |
| 27         | 2.07 ( <i>m</i> )                    | 40.2                      | 2.06 ( <i>m</i> )                     | 39.9                      |
| 28         | 1.66 ( <i>s</i> )                    | 16.5                      | 1.67 ( <i>s</i> )                     | 16.2                      |
| 29         | 2.07 ( <i>m</i> )                    | 26.7                      | 2.07 ( <i>m</i> )                     | 26.5                      |
| 30         | 5.06 ( <i>br s</i> )                 | 124.4                     | 5.07 ( <i>br s</i> )                  | 124.1                     |
| 31         | –                                    | 131.8                     | –                                     | 131.3                     |
| 32         | 1.66 ( <i>s</i> )                    | 25.9                      | 1.67 ( <i>s</i> )                     | 25.7                      |
| 33         | 1.59 ( <i>s</i> )                    | 17.8                      | 1.58 ( <i>s</i> )                     | 17.6                      |
| 34         | 1.42 ( <i>s</i> )                    | 25.2                      | 1.42 ( <i>s</i> )                     | 25.2                      |
| 35         | 1.39 ( <i>s</i> )                    | 22.6                      | 1.39 ( <i>s</i> )                     | 22.5                      |

**Table S7.**  $^1\text{H}$  NMR (500 MHz,  $\delta_{\text{H}}$ , multi, ( $J$  in Hz) and  $^{13}\text{C}$  NMR (125 MHz) data of compound **7** in acetone- $d_6$ .

| No.   | <b>7</b><br>(acetone- $d_6$ )      |                           | <b><math>\beta</math>-Mangostin</b><br>(acetone- $d_6$ ) |                           |
|-------|------------------------------------|---------------------------|----------------------------------------------------------|---------------------------|
|       | $\delta_{\text{H}}$ (ppm) $J$ (Hz) | $\delta_{\text{C}}$ (ppm) | $\delta_{\text{H}}$ (ppm) $J$ (Hz)                       | $\delta_{\text{C}}$ (ppm) |
| 1     | –                                  | 160.7                     | –                                                        | 159.7                     |
| 2     | –                                  | 111.9                     | –                                                        | 111.4                     |
| 3     | –                                  | 164.6                     | –                                                        | 163.5                     |
| 4     | 6.52 (1H, <i>s</i> )               | 89.9                      | 6.33 (1H, <i>s</i> )                                     | 88.8                      |
| 4a    | –                                  | 155.6                     | –                                                        | 155.6                     |
| 5     | 6.87 (1H, <i>s</i> )               | 102.7                     | 6.82 (1H, <i>s</i> )                                     | 101.5                     |
| 6     | –                                  | 156.3                     | –                                                        | 154.4                     |
| 7     | –                                  | 144.6                     | –                                                        | 142.5                     |
| 8     | –                                  | 138.1                     | –                                                        | 137.0                     |
| 8a    | –                                  | 112.8                     | –                                                        | 112.3                     |
| 9     | –                                  | 182.9                     | –                                                        | 181.9                     |
| 9a    | –                                  | 103.7                     | –                                                        | 103.7                     |
| 10a   | –                                  | 157.8                     | –                                                        | 155.2                     |
| 11    | 3.32 (2H, <i>d</i> , $J = 6.6$ )   | 21.9                      | 3.36 (2H, <i>d</i> , $J = 6.8$ )                         | 21.3                      |
| 12    | 5.21 (1H, <i>t</i> , $J = 6.6$ )   | 123.3                     | 5.29 (1H, <i>t</i> , $J = 6.8$ )                         | 122.3                     |
| 13    | –                                  | 132.0                     | –                                                        | 132.0                     |
| 14    | 1.63 (3H, <i>s</i> )               | 25.9                      | 1.85 (3H, <i>s</i> )                                     | 25.8                      |
| 15    | 1.77 (3H, <i>s</i> )               | 17.8                      | 1.82 (3H, <i>s</i> )                                     | 25.8                      |
| 16    | 4.13 (2H, <i>d</i> , $J = 6.6$ )   | 26.9                      | 4.11 (2H, <i>d</i> , $J = 6.8$ )                         | 26.5                      |
| 17    | 5.27 (1H, <i>t</i> , $J = 6.6$ )   | 124.7                     | 5.25 (1H, <i>t</i> , $J = 6.8$ )                         | 123.2                     |
| 18    | –                                  | 131.5                     | –                                                        | 131.7                     |
| 19    | 1.65 (3H, <i>s</i> )               | 25.9                      | 1.72 (3H, <i>s</i> )                                     | 18.2                      |
| 20    | 1.83 (3H, <i>s</i> )               | 18.3                      | 1.71 (3H, <i>s</i> )                                     | 17.7                      |
| 1-OH  | 13.67 (1H, <i>s</i> )              | –                         | 13.44 (1H, <i>s</i> )                                    | –                         |
| 6-OH  | –                                  | –                         | 6.43 (1H, <i>s</i> )                                     | –                         |
| 3-OMe | 3.97 (3H, <i>s</i> )               | 56.6                      | 3.82 (3H, <i>s</i> )                                     | 55.8                      |
| 7-OMe | 3.80 (3H, <i>s</i> )               | 61.3                      | 3.92 (3H, <i>s</i> )                                     | 62.0                      |

**Table S8.**  $^1\text{H}$  NMR (500 MHz,  $\delta_{\text{H}}$ , multi, ( $J$  in Hz) and  $^{13}\text{C}$  NMR (125 MHz) data of compound **8** in  $\text{CDCl}_3$ .

| No. | <b>8</b><br>( $\text{CDCl}_3$ )    |                           | <b><math>\alpha</math>-Mangostin</b><br>( $\text{CDCl}_3$ ) |                           |
|-----|------------------------------------|---------------------------|-------------------------------------------------------------|---------------------------|
|     | $\delta_{\text{H}}$ (ppm) $J$ (Hz) | $\delta_{\text{C}}$ (ppm) | $\delta_{\text{H}}$ (ppm) $J$ (Hz)                          | $\delta_{\text{C}}$ (ppm) |
| 1   | –                                  | 160.7                     | –                                                           | 160.6                     |
| 2   | –                                  | 108.7                     | –                                                           | 108.5                     |



| No.                | <b>8</b><br>(CDCl <sub>3</sub> )        |                           | <b><math>\alpha</math>-Mangostin</b><br>(CDCl <sub>3</sub> ) |                           |
|--------------------|-----------------------------------------|---------------------------|--------------------------------------------------------------|---------------------------|
|                    | $\delta_{\text{H}}$ (ppm) <i>J</i> (Hz) | $\delta_{\text{C}}$ (ppm) | $\delta_{\text{H}}$ (ppm) <i>J</i> (Hz)                      | $\delta_{\text{C}}$ (ppm) |
| 3                  | –                                       | 161.8                     | –                                                            | 161.6                     |
| 4                  | 6.30 (1H, <i>s</i> )                    | 93.5                      | 6.36 (1H, <i>s</i> )                                         | 93.3                      |
| 4a                 | –                                       | 154.7                     | –                                                            | 154.5                     |
| 5                  | 6.83 (1H, <i>s</i> )                    | 103.7                     | 6.82 (1H, <i>s</i> )                                         | 102.8                     |
| 6                  | –                                       | 155.9                     | –                                                            | 155.8                     |
| 7                  | –                                       | 142.7                     | –                                                            | 142.5                     |
| 8                  | –                                       | 137.2                     | –                                                            | 137.0                     |
| 8a                 | –                                       | 112.3                     | –                                                            | 112.2                     |
| 9                  | –                                       | 182.1                     | –                                                            | 182.0                     |
| 9a                 | –                                       | 101.7                     | –                                                            | 101.6                     |
| 10a                | –                                       | 155.2                     | –                                                            | 155.3                     |
| 11                 | 3.44 (2H, <i>d</i> , <i>J</i> = 7)      | 21.6                      | 3.45 (2H, <i>d</i> , <i>J</i> = 6.6)                         | 21.4                      |
| 12                 | 5.28 (1H, <i>t</i> , <i>J</i> = 7)      | 121.6                     | 5.29 (1H, <i>t</i> , <i>J</i> = 6.6)                         | 121.5                     |
| 13                 | –                                       | 132.3                     | –                                                            | 131.1                     |
| 14                 | 1.84 (3H, <i>s</i> )                    | 18.4                      | 1.84 (3H, <i>s</i> )                                         | 18.2                      |
| 15                 | 1.83 (3H, <i>s</i> )                    | 26.0                      | 1.83 (3H, <i>s</i> )                                         | 25.8                      |
| 16                 | 4.08 (2H, <i>d</i> , <i>J</i> = 6.5)    | 26.7                      | 4.09 (2H, <i>d</i> , <i>J</i> = 6.6)                         | 26.6                      |
| 17                 | 5.26 (1H, <i>t</i> , <i>J</i> = 6.5)    | 123.3                     | 5.26 (1H, <i>t</i> , <i>J</i> = 6.6)                         | 123.1                     |
| 18                 | –                                       | 135.8                     | –                                                            | 135.6                     |
| 19                 | 1.77 (3H, <i>s</i> )                    | 18.1                      | 1.77 (3H, <i>s</i> )                                         | 17.9                      |
| 20                 | 1.69 (3H, <i>s</i> )                    | 26.0                      | 1.69 (3H, <i>s</i> )                                         | 25.8                      |
| 1-OH               | –                                       | –                         | 13.78 (1H, <i>s</i> )                                        | –                         |
| 7-OCH <sub>3</sub> | 3.80 (3H, <i>s</i> )                    | 62.2                      | 3.79 (3H, <i>s</i> )                                         | 62.0                      |

**Table S9.** <sup>1</sup>H NMR (500 MHz,  $\delta_{\text{H}}$ , multi, (*J* in Hz) and <sup>13</sup>C NMR (125 MHz) data of compound **9** in acetone-*d*<sub>6</sub>.

| No. | <b>9</b><br>(acetone- <i>d</i> <sub>6</sub> ) |                           | <b>9-Hydroxycalabaxanthone</b><br>(CDCl <sub>3</sub> ) |                           |
|-----|-----------------------------------------------|---------------------------|--------------------------------------------------------|---------------------------|
|     | $\delta_{\text{H}}$ (ppm) <i>J</i> (Hz)       | $\delta_{\text{C}}$ (ppm) | $\delta_{\text{H}}$ (ppm) <i>J</i> (Hz)                | $\delta_{\text{C}}$ (ppm) |
| 1   | –                                             | 158.8                     | –                                                      | 157.8                     |
| 2   | –                                             | 105.2                     | –                                                      | 104.4                     |
| 3   | –                                             | 160.7                     | –                                                      | nd                        |
| 4   | 6.26 (1H, <i>s</i> )                          | 94.6                      | 6.24 (1H, <i>s</i> )                                   | 94.0                      |
| 4a  | –                                             | 157.2                     | –                                                      | 156.1                     |
| 5   | 6.87 (1H, <i>s</i> )                          | 102.9                     | 6.83 (1H, <i>s</i> )                                   | 101.6                     |
| 6   | –                                             | 158.8                     | –                                                      | 154.5                     |

| No.                | <b>9</b><br>(acetone- $d_6$ )      |                           | <b>9-Hydroxycalabaxanthone</b><br>(CDCl <sub>3</sub> ) |                           |
|--------------------|------------------------------------|---------------------------|--------------------------------------------------------|---------------------------|
|                    | $\delta_{\text{H}}$ (ppm) $J$ (Hz) | $\delta_{\text{C}}$ (ppm) | $\delta_{\text{H}}$ (ppm) $J$ (Hz)                     | $\delta_{\text{C}}$ (ppm) |
| 7                  | –                                  | 144.8                     | –                                                      | 142.7                     |
| 8                  | –                                  | 138.2                     | –                                                      | 136.9                     |
| 8a                 | –                                  | 111.8                     | –                                                      | 112.1                     |
| 9                  | –                                  | 183.1                     | –                                                      | 181.8                     |
| 9a                 | –                                  | 104.5                     | –                                                      | 103.6                     |
| 10                 | –                                  | –                         | –                                                      | –                         |
| 10a                | –                                  | 157.2                     | –                                                      | 155.6                     |
| 11                 | 6.68 (1H, <i>d</i> , $J = 10.0$ )  | 116.0                     | 6.73 (1H, <i>d</i> , $J = 9.9$ )                       | 115.6                     |
| 12                 | 5.72 (1H, <i>d</i> , $J = 10.0$ )  | 125.5                     | 5.57 (1H, <i>d</i> , $J = 9.9$ )                       | 126.9                     |
| 13                 | –                                  | 78.8                      | –                                                      | 77.8                      |
| 14                 | 1.46 (3H, <i>s</i> )               | 28.5                      | 1.46 (3H, <i>s</i> )                                   | 28.3                      |
| 15                 | 1.46 (3H, <i>s</i> )               | 28.5                      | 1.46 (3H, <i>s</i> )                                   | 28.3                      |
| 16                 | 4.12 (2H, <i>d</i> , $J = 6.5$ )   | 26.8                      | 4.09 (2H, <i>d</i> , $J = 6.6$ )                       | 26.5                      |
| 17                 | 5.26 (1H, <i>t</i> , $J = 6.5$ )   | 124.6                     | 5.27 (1H, <i>t</i> , $J = 6.6$ )                       | 123.1                     |
| 18                 | –                                  | 131.6                     | –                                                      | 131.8                     |
| 19                 | 1.82 (3H, <i>s</i> )               | 18.3                      | 1.83 (3H, <i>s</i> )                                   | 18.1                      |
| 20                 | 1.65 (3H, <i>s</i> )               | 25.9                      | 1.70 (3H, <i>s</i> )                                   | 25.6                      |
| 1-OH               | 13.93 (1H, <i>s</i> )              | –                         | 13.70 (1H, <i>s</i> )                                  | –                         |
| 6-OH               | –                                  | –                         | –                                                      | –                         |
| 7-OCH <sub>3</sub> | 3.80 (3H, <i>s</i> )               | 61.3                      | 3.81 (3H, <i>s</i> )                                   | 61.8                      |

**Table S10.** <sup>1</sup>H NMR (500 MHz,  $\delta_{\text{H}}$ , multi, ( $J$  in Hz) and <sup>13</sup>C NMR (125 MHz) data of compound **10** in acetone- $d_6$ .

| No. | <b>10</b><br>(acetone- $d_6$ )     |                           | <b>Fuscaxanthone A</b><br>(acetone- $d_6$ ) |                           |
|-----|------------------------------------|---------------------------|---------------------------------------------|---------------------------|
|     | $\delta_{\text{H}}$ (ppm) $J$ (Hz) | $\delta_{\text{C}}$ (ppm) | $\delta_{\text{H}}$ (ppm) $J$ (Hz)          | $\delta_{\text{C}}$ (ppm) |
| 1   | –                                  | 158.9                     | –                                           | 157.9                     |
| 2   | –                                  | 104.7                     | –                                           | 104.5                     |
| 3   | –                                  | 160.7                     | –                                           | 159.8                     |
| 4   | 6.26 (1H, <i>s</i> )               | 94.7                      | 6.24 (1H, <i>s</i> )                        | 94.1                      |
| 4a  | –                                  | 157.2                     | –                                           | 156.2                     |
| 5   | 6.87 (1H, <i>s</i> )               | 102.9                     | 6.83 (1H, <i>s</i> )                        | 101.6                     |
| 6   | –                                  | 156.3                     | –                                           | 154.5                     |
| 7   | –                                  | 142.1                     | –                                           | 142.7                     |
| 8   | –                                  | 138.3                     | –                                           | 137.0                     |
| 8a  | –                                  | 112.0                     | –                                           | 112.2                     |

| No.                | <b>10</b><br>(acetone- $d_6$ )     |                           | <b>Fuscaxanthone A</b><br>(acetone- $d_6$ ) |                           |
|--------------------|------------------------------------|---------------------------|---------------------------------------------|---------------------------|
|                    | $\delta_{\text{H}}$ (ppm) $J$ (Hz) | $\delta_{\text{C}}$ (ppm) | $\delta_{\text{H}}$ (ppm) $J$ (Hz)          | $\delta_{\text{C}}$ (ppm) |
| 9                  | –                                  | 182.5                     | –                                           | 181.9                     |
| 9a                 | –                                  | 103.6                     | –                                           | 103.7                     |
| 10                 | –                                  | –                         | –                                           | –                         |
| 10a                | –                                  | 157.8                     | –                                           | 155.7                     |
| 11                 | 6.68 (1H, $d$ , $J = 10.0$ )       | 116.0                     | 6.72 (1H, $d$ , $J = 10.0$ )                | 115.7                     |
| 12                 | 5.72 (1H, $d$ , $J = 10.0$ )       | 128.5                     | 5.56 (1H, $d$ , $J = 10.0$ )                | 127.1                     |
| 13                 | –                                  | 78.3                      | –                                           | 77.9                      |
| 14                 | 1.46 (3H, $s$ )                    | 28.5                      | 1.46 (3H, $s$ )                             | 28.3                      |
| 15                 | 1.46 (3H, $s$ )                    | 28.5                      | 1.46 (3H, $s$ )                             | 28.3                      |
| 16                 | 4.13 (2H, $d$ , $J = 6.5$ )        | 26.8                      | 4.09 (2H, $d$ , $J = 6.5$ )                 | 26.5                      |
| 17                 | 5.28 (1H, $m$ )                    | 124.7                     | 5.26 (1H, $m$ )                             | 123.2                     |
| 18                 | –                                  | 135.3                     | –                                           | 135.6                     |
| 19                 | 1.98 (2H, $m$ )                    | 40.5                      | 2.01 (2H, $m$ )                             | 39.7                      |
| 20                 | 2.05 (2H, $m$ )                    | 27.3                      | 2.04 (2H, $m$ )                             | 26.4                      |
| 21                 | 5.04 (1H, $m$ )                    | 125.2                     | 5.02 (1H, $m$ )                             | 124.2                     |
| 22                 | –                                  | 131.6                     | –                                           | 131.2                     |
| 23                 | 1.52 (3H, $s$ )                    | 17.8                      | 1.54 (3H, $s$ )                             | 17.6                      |
| 24                 | 1.84 (3H, $s$ )                    | 16.5                      | 1.82 (3H, $s$ )                             | 16.5                      |
| 25                 | 1.56 (3H, $s$ )                    | 25.7                      | 1.60 (3H, $s$ )                             | 25.6                      |
| 1-OH               | 13.93 (1H, $s$ )                   | –                         | 13.55 (1H, $s$ )                            | –                         |
| 6-OH               | 9.71 (1H, $s$ )                    | –                         | 6.15 (1H, $s$ )                             | –                         |
| 7-OCH <sub>3</sub> | 3.80 (3H, $s$ )                    | 61.4                      | 3.73 (3H, $s$ )                             | 62.0                      |

**Table S11.** <sup>1</sup>H NMR (500 MHz,  $\delta_{\text{H}}$ , multi, ( $J$  in Hz) and <sup>13</sup>C NMR (125 MHz) spectral data comparison of compound **11** in acetone- $d_6$ .

| No. | <b>11</b><br>(acetone- $d_6$ )     |                           | <b>11-hydroxy-1-isomangostin</b><br>(acetone- $d_6$ ) |                           |
|-----|------------------------------------|---------------------------|-------------------------------------------------------|---------------------------|
|     | $\delta_{\text{H}}$ (ppm) $J$ (Hz) | $\delta_{\text{C}}$ (ppm) | $\delta_{\text{H}}$ (ppm) $J$ (Hz)                    | $\delta_{\text{C}}$ (ppm) |
| 1   | –                                  | 156.0                     | –                                                     | 155.9                     |
| 2   | –                                  | 105.5                     | –                                                     | 105.0                     |
| 3   | –                                  | 161.2                     | –                                                     | 161.0                     |
| 4   | 6.39 (1H, $s$ )                    | 94.1                      | 6.40 (1H, $s$ )                                       | 94.2                      |
| 4a  | –                                  | 157.6                     | –                                                     | 157.6                     |
| 4b  | –                                  | 154.9                     | –                                                     | 154.9                     |
| 5   | 6.71 (1H, $s$ )                    | 102.1                     | 6.72 (1H, $s$ )                                       | 102.1                     |
| 6   | –                                  | 155.6                     | –                                                     | 155.8                     |

| No.   | 11<br>(acetone- <i>d</i> <sub>6</sub> )                                                    |                           | 11-hydroxy-1-isomangostin<br>(acetone- <i>d</i> <sub>6</sub> )                             |                           |
|-------|--------------------------------------------------------------------------------------------|---------------------------|--------------------------------------------------------------------------------------------|---------------------------|
|       | $\delta_{\text{H}}$ (ppm) <i>J</i> (Hz)                                                    | $\delta_{\text{C}}$ (ppm) | $\delta_{\text{H}}$ (ppm) <i>J</i> (Hz)                                                    | $\delta_{\text{C}}$ (ppm) |
| 7     | –                                                                                          | 144.4                     | –                                                                                          | 144.3                     |
| 8     | –                                                                                          | 137.7                     | –                                                                                          | 137.6                     |
| 8a    | –                                                                                          | 115.4                     | –                                                                                          | 115.1                     |
| 9     | –                                                                                          | 176.1                     | –                                                                                          | 176.3                     |
| 9a    | –                                                                                          | 107.9                     | –                                                                                          | 107.7                     |
| 10    | 2.57 (1H, <i>dd</i> , <i>J</i> = 16.8, 7.8)<br>2.92 (1H, <i>dd</i> , <i>J</i> = 16.8, 5.8) | 27.1                      | 2.56 (1H, <i>dd</i> , <i>J</i> = 16.8, 7.8)<br>2.94 (1H, <i>dd</i> , <i>J</i> = 16.8, 5.7) | 27.1                      |
| 11    | 3.81 (1H, <i>dd</i> , <i>J</i> = 8, 5.5)                                                   | 69.1                      | 3.82 (1H, <i>dd</i> , <i>J</i> = 7.8, 5.7)                                                 | 69.0                      |
| 12    | –                                                                                          | 78.6                      | –                                                                                          | 78.5                      |
| 13    | 1.30 (3H, <i>s</i> )                                                                       | 20.6                      | 1.30 (3H, <i>s</i> )                                                                       | 20.6                      |
| 14    | 1.43 (3H, <i>s</i> )                                                                       | 26.0                      | 1.43 (3H, <i>s</i> )                                                                       | 26.0                      |
| 15    | 4.09 (2H, <i>t</i> , <i>J</i> = 6)                                                         | 26.6                      | 4.09 (2H, <i>d</i> , <i>J</i> = 6.8)                                                       | 26.6                      |
| 16    | 5.31 (1H, <i>t</i> , <i>J</i> = 6.8)                                                       | 125.6                     | 5.31 (1H, <i>br t</i> , <i>J</i> = 6.8)                                                    | 125.8                     |
| 17    | –                                                                                          | 130.2                     | –                                                                                          | 130.5                     |
| 18    | 1.82 (3H, <i>s</i> )                                                                       | 26.1                      | 1.81 (3H, <i>br s</i> )                                                                    | 26.1                      |
| 19    | 1.65 (3H, <i>s</i> )                                                                       | 18.3                      | 1.64 (3H, <i>br s</i> )                                                                    | 18.3                      |
| 7-OMe | 3.77 (3H, <i>s</i> )                                                                       | 61.2                      | 3.77 (3H, <i>s</i> )                                                                       | 61.0                      |

**Table S12.** Alpha-glucosidase inhibition (IC<sub>50</sub>) by extracts of studied plant

| Bio-source      |                           | IC <sub>50</sub>  |
|-----------------|---------------------------|-------------------|
| <b>Extract</b>  | Crude MeOH                | 27.7 ± 0.5 µg/mL  |
|                 | Extract <b>H</b>          | >200 µg/mL        |
|                 | Extract <b>EA</b>         | 66.0 ± 2.6 µg/mL  |
| <b>Fraction</b> | Fractions <b>EA1-EA5</b>  | >200 µg/mL        |
|                 | Fraction <b>EA6</b>       | 12.0 ± 0.4 µg/mL  |
|                 | Fractions <b>EA7-EA11</b> | >200 µg/mL        |
|                 | Fraction <b>EA12</b>      | 60.9 ± 1.2 µg/mL  |
|                 | Fraction <b>EA13</b>      | >200 µg/mL        |
|                 | Fraction <b>EA14</b>      | >200 µg/mL        |
|                 | Fraction <b>EA15</b>      | 66.9 ± 3.7 µg/mL  |
|                 | Fraction <b>EA16</b>      | 155.9 ± 4.4 µg/mL |

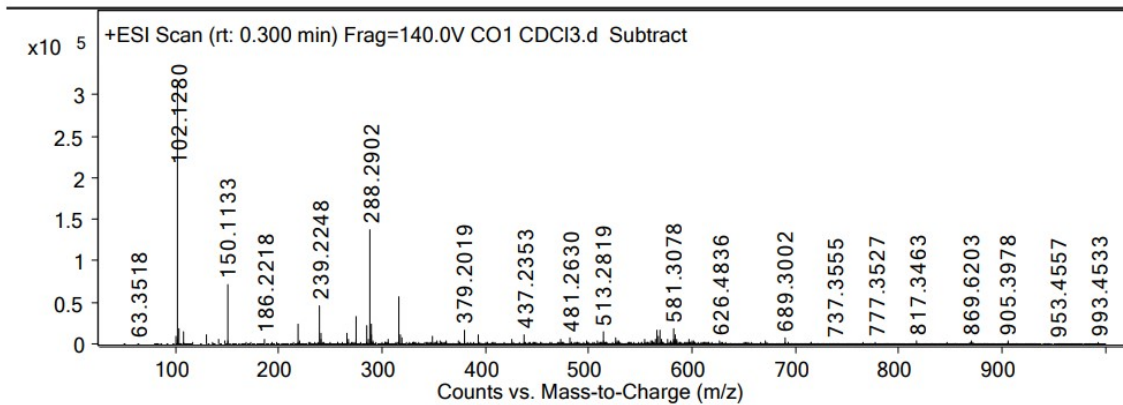

Qualitative Analysis Report

|          |         |
|----------|---------|
| 535.34   | 505.45  |
| 535.4021 | 464     |
| 535.4724 | 285.27  |
| 536.2408 | 315.57  |
| 536.3544 | 482.45  |
| 536.355  | 367.71  |
| 537.2214 | 389.98  |
| 537.2855 | 258.96  |
| 537.3175 | 1644.98 |
| 537.4089 | 211.38  |
| 538.222  | 408.70  |
| 538.3198 | 753.27  |
| 538.3705 | 551.23  |
| 538.4315 | 2609.87 |
| 538.61   | 324.96  |
| 538.9174 | 213.55  |
| 539.1318 | 204.8   |
| 539.2621 | 864.14  |
| 539.2941 | 1170.32 |
| 539.3386 | 724.5   |
| 539.3704 | 451.58  |
| 539.4331 | 662.92  |
| 540.2837 | 838.01  |
| 540.334  | 1028.29 |
| 540.4314 | 805.96  |
| 540.5389 | 589.08  |
| 540.5925 | 249.86  |
| 541.1746 | 310.72  |
| 541.2671 | 1580.1  |
| 541.3711 | 1031.17 |
| 541.443  | 374.14  |
| 542.2172 | 231.78  |
| 542.252  | 796.59  |
| 542.3474 | 494.92  |
| 542.3848 | 428.57  |
| 543.1245 | 324.05  |
| 543.3859 | 1136.04 |
| 543.4429 | 218.1   |
| 543.5453 | 244.90  |
| 544.2002 | 207.88  |
| 544.2698 | 375.34  |
| 544.3806 | 614.06  |
| 544.4136 | 506.6   |
| 545.2855 | 875     |
| 545.2467 | 270.47  |
| 545.4182 | 270.35  |

Page 26 of 54

Printed at 2:48 PM on 25 Feb 2022

Agilent Technologies

User Spectrum Plot Report

Agilent | Trusted Accounts

Name: GA A9 Rack Pos.: Instrument: 6545B Operator:  
 Inj. Vol. (ul): 3 Plate Pos.: IRM Status: All ions missed  
 Data File: GA A9.d Method (Acq): CO TUYEN 16112023 Comment: Acq. Time (Local): 17/11/2023 6:37:36 PM  
 GAA 09.m (UTC+07:00)

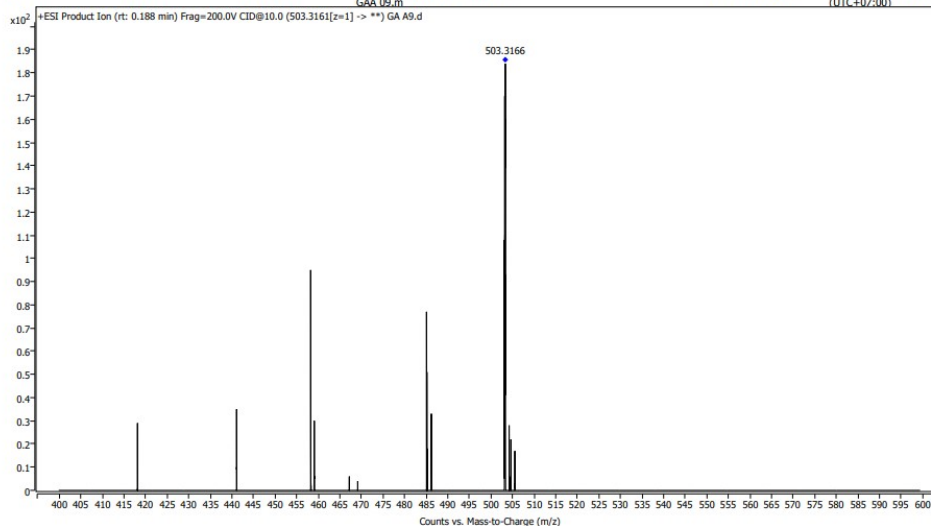

Page 1 of 1

Generated at 10:05 AM on 18/11/2023

Figure S1A. The HRESIMS spectrum of 1.

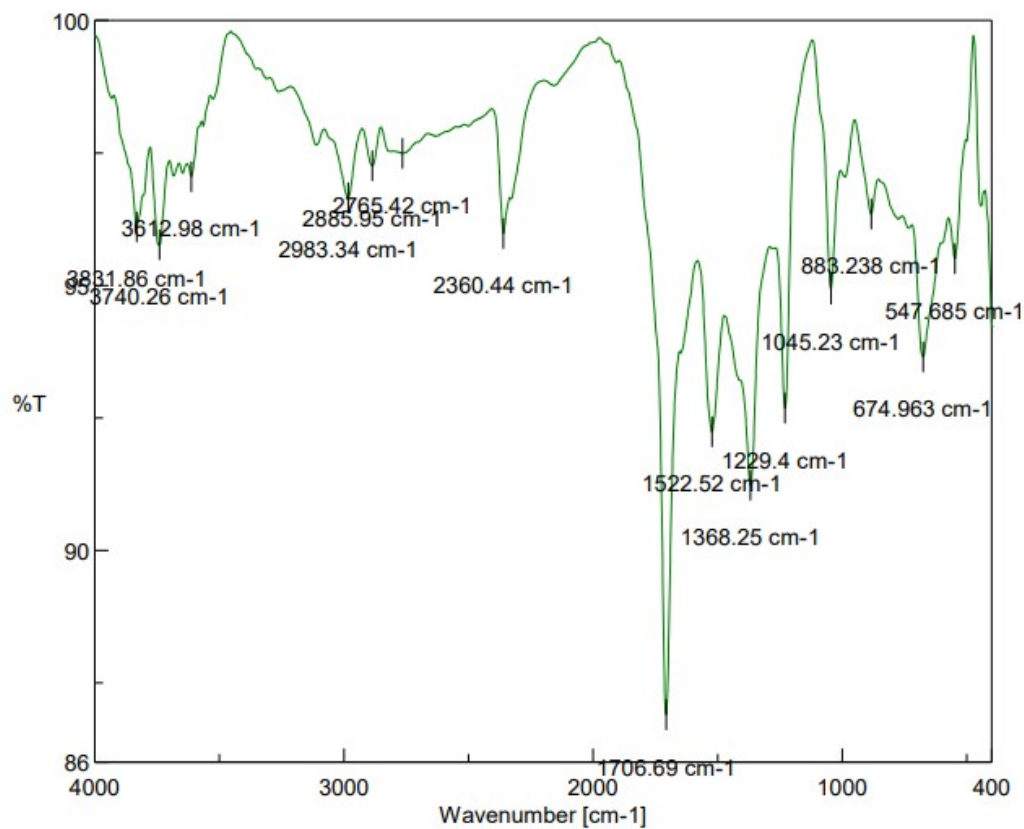

Figure S1B. The IR spectrum of 1.

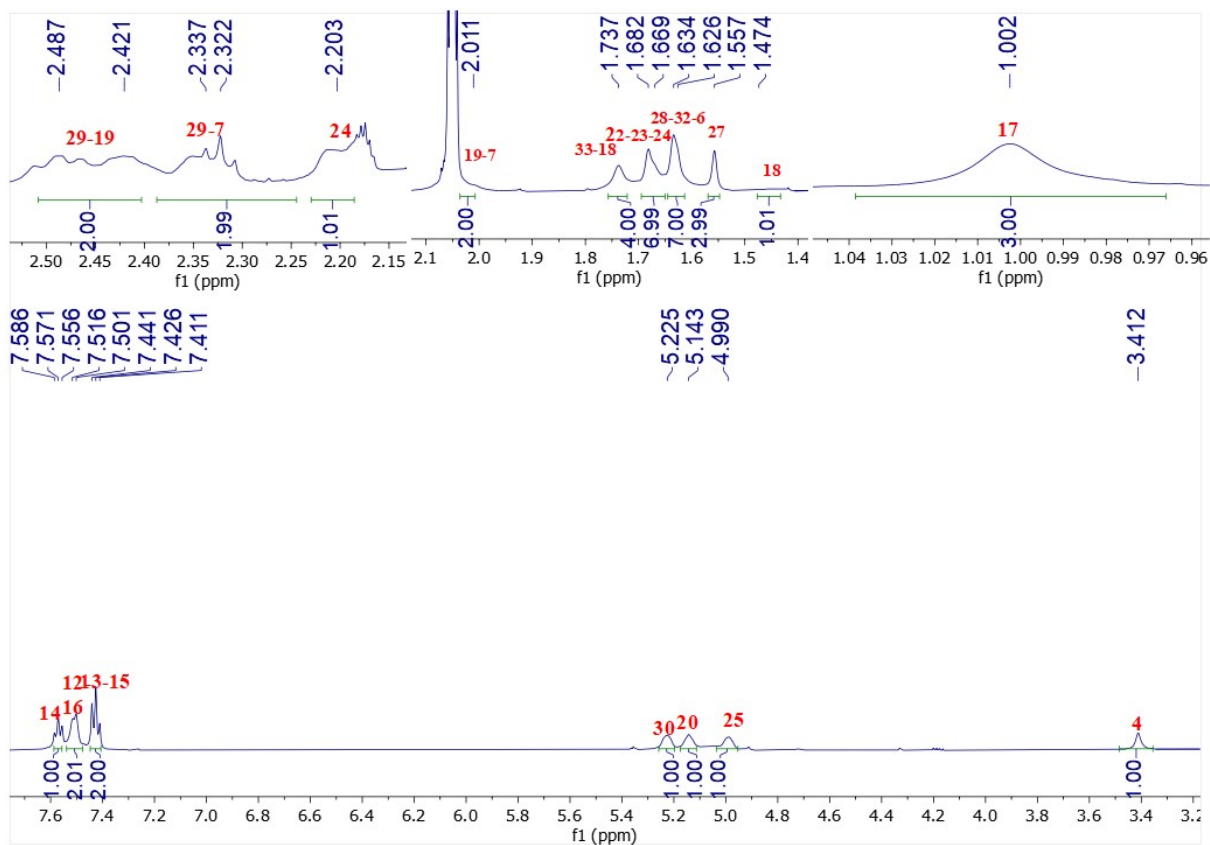

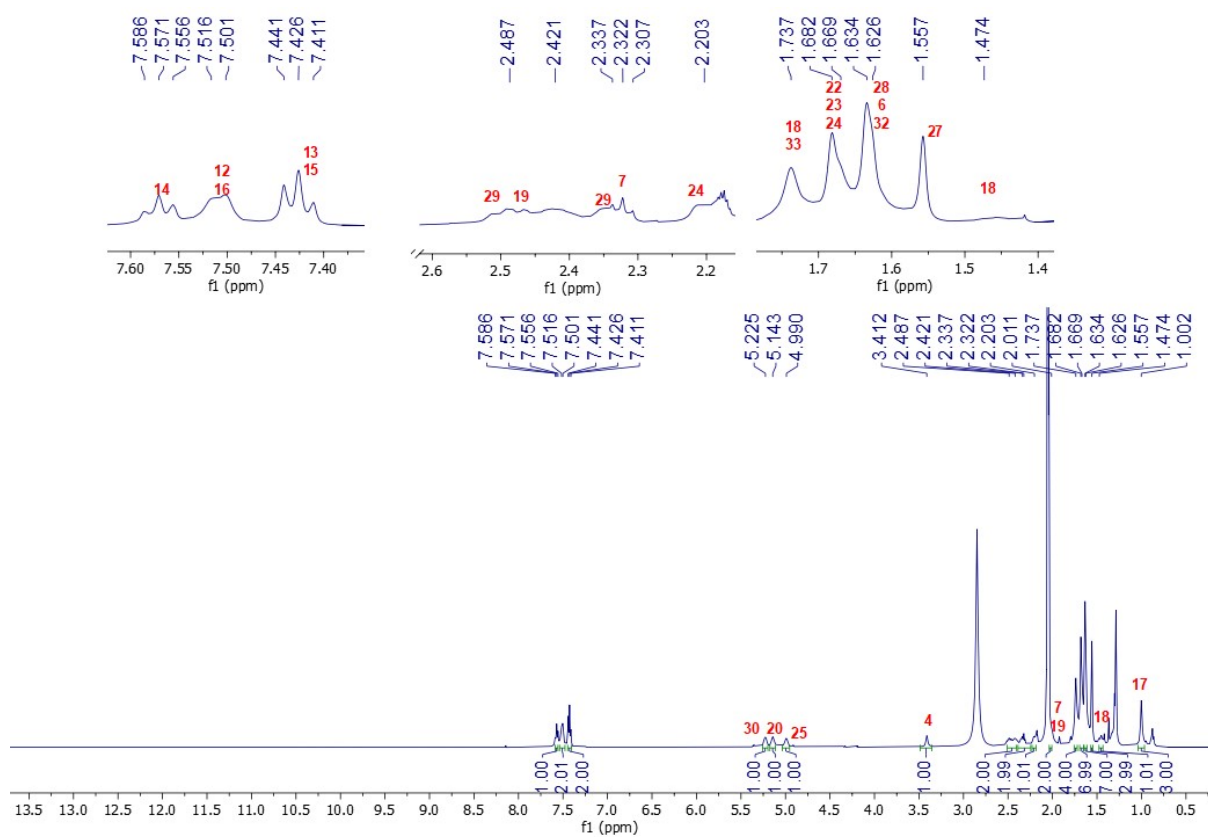

Figure S1C. The  $^1\text{H}$  NMR spectrum of **1** in acetone- $d_6$ .

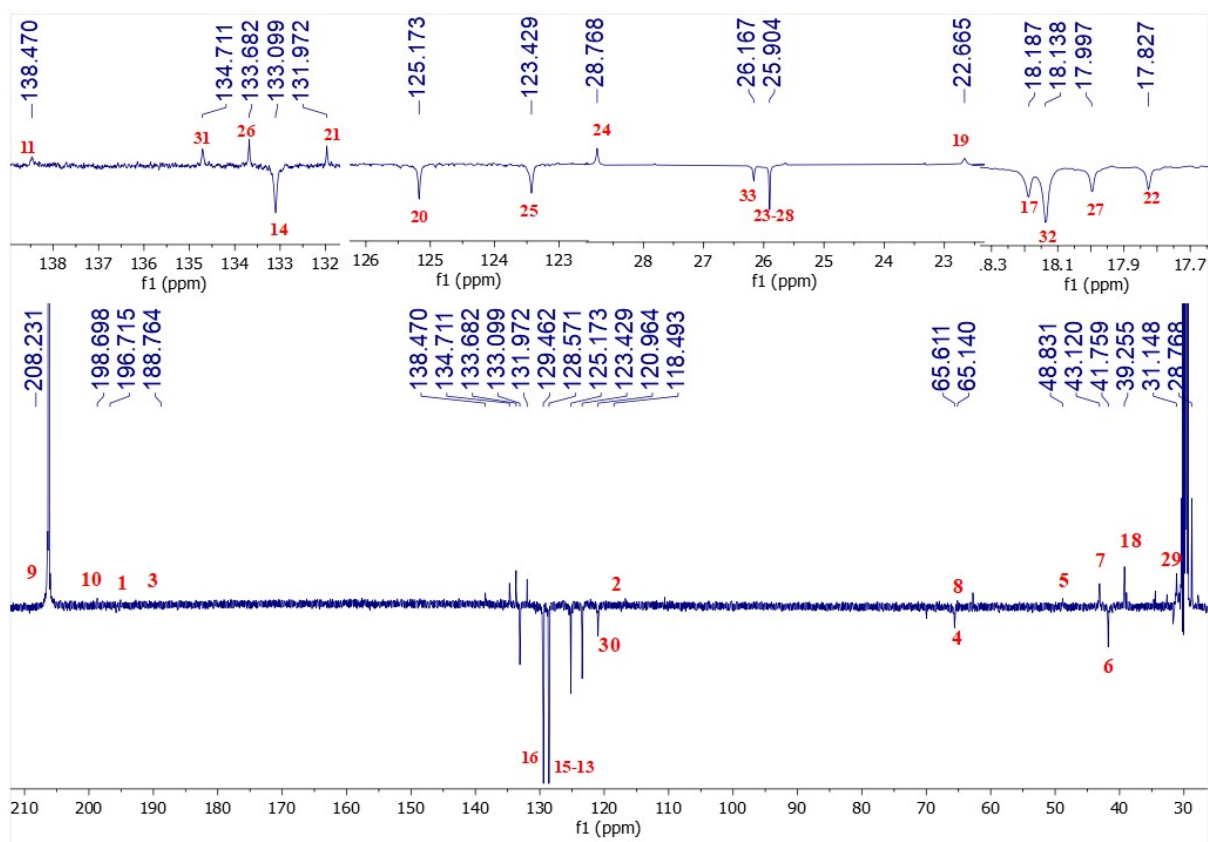

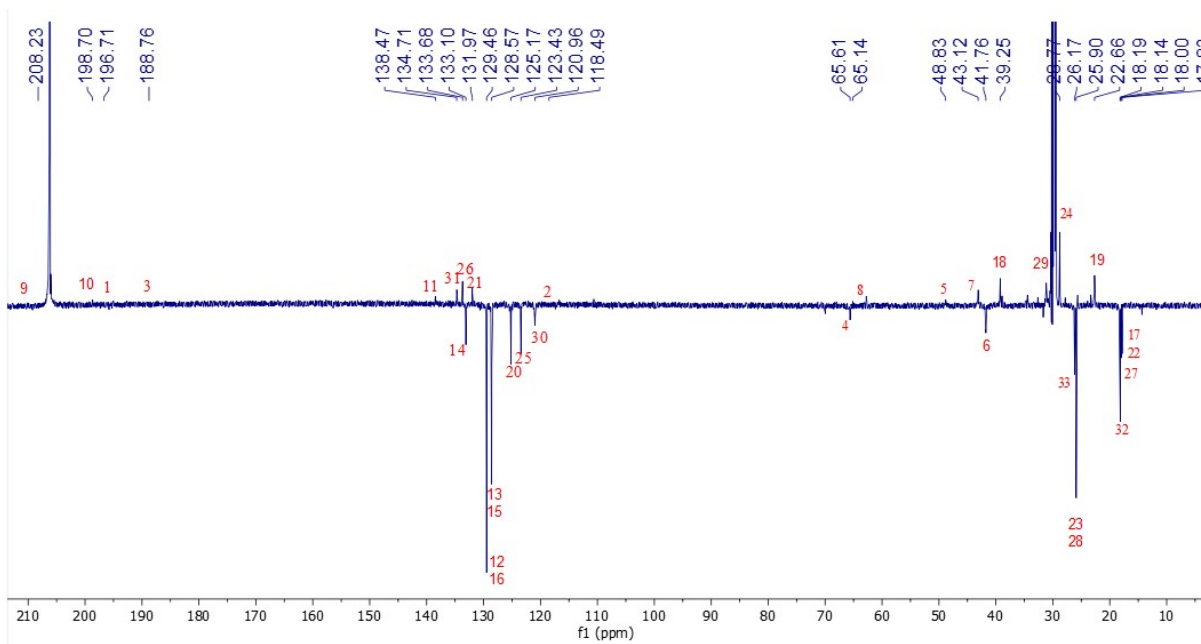

**Figure S1D.** The  $^{13}\text{C}$  NMR spectrum of **1** in acetone- $d_6$ .

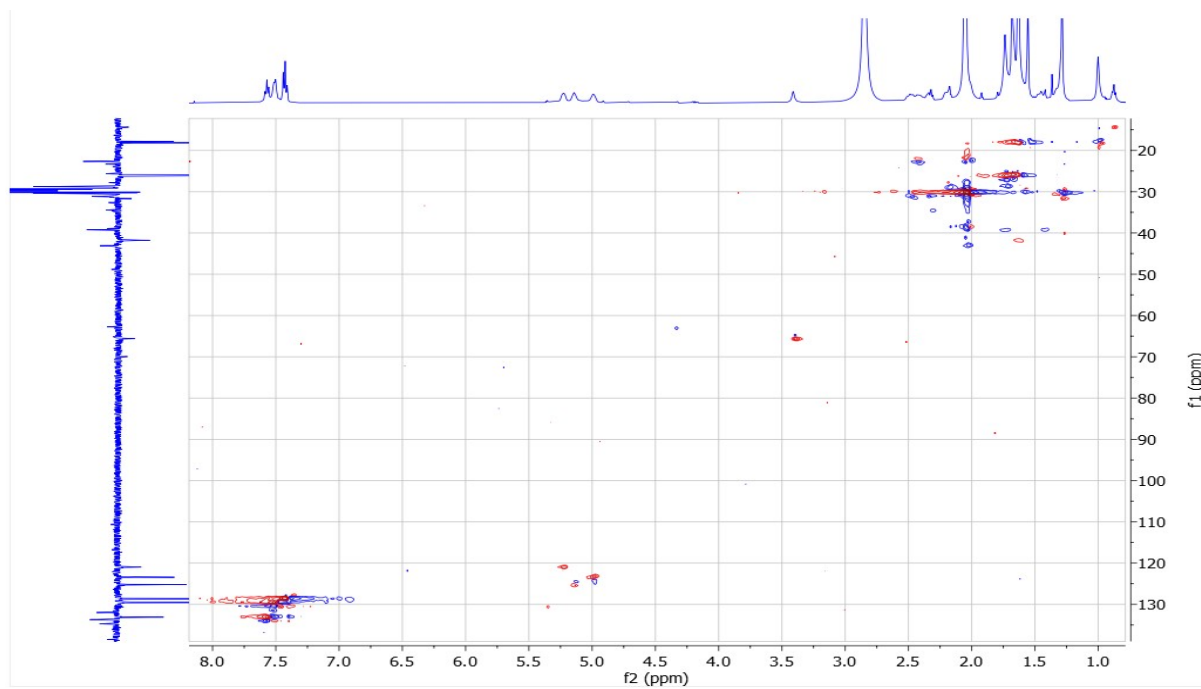

**Figure S1E.** The HSQC spectrum of **1** in acetone- $d_6$ .



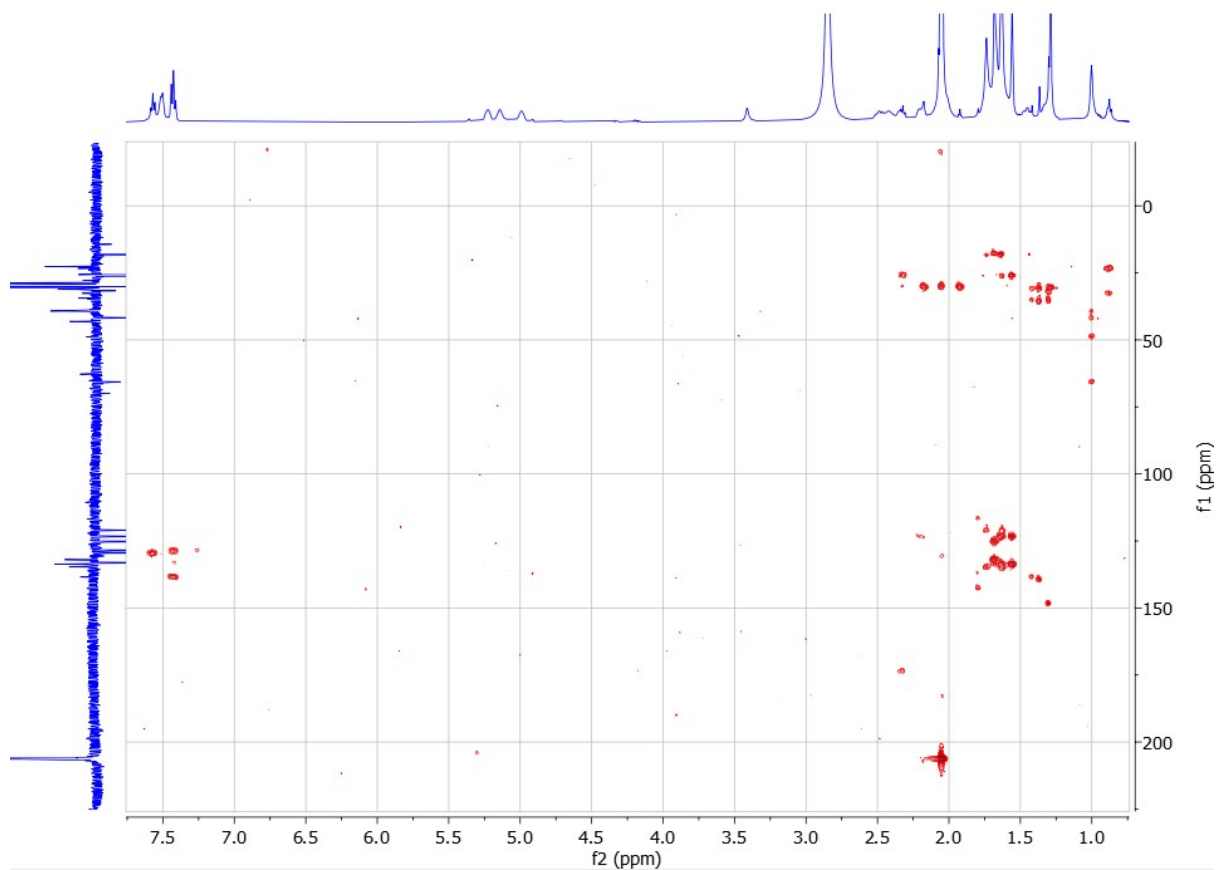

**Figure S1F.** The HMBC spectrum of **1** in acetone- $d_6$ .

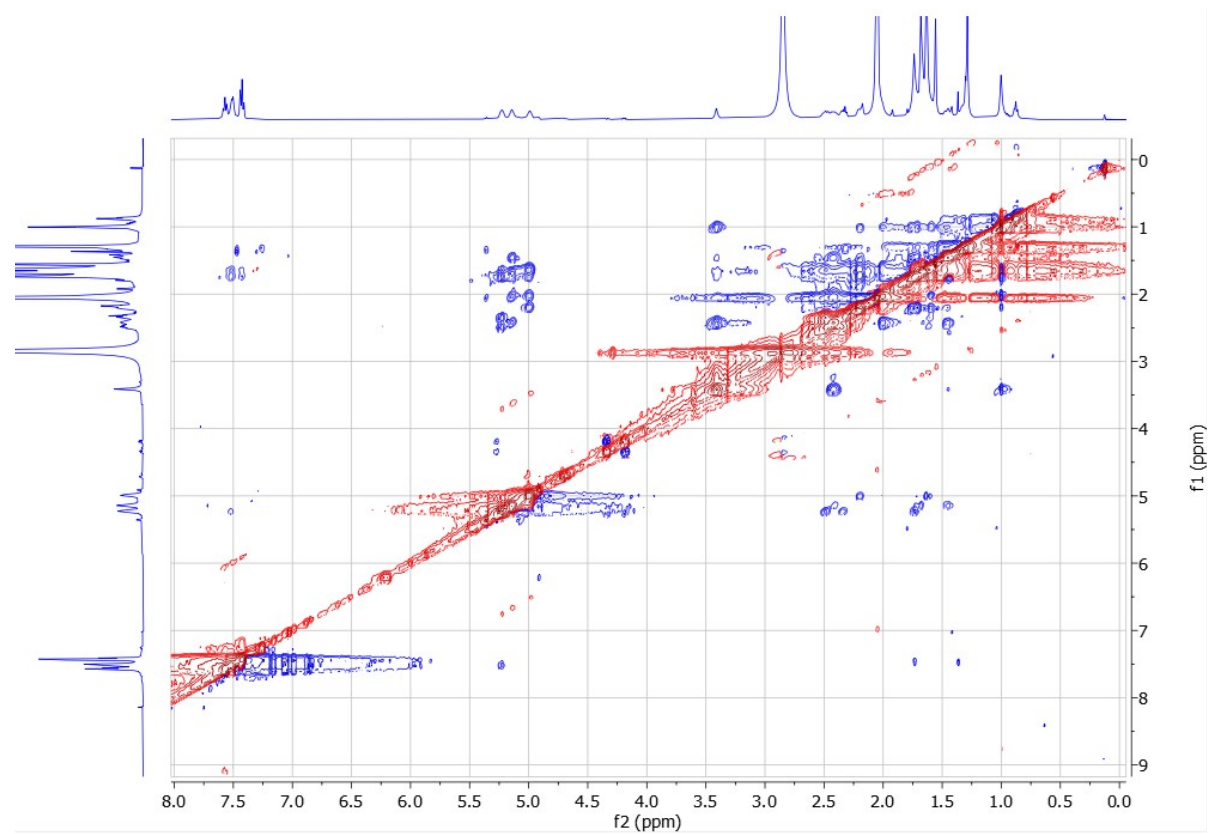

**Figure S1G.** The NOESY spectrum of **1** in acetone- $d_6$ .

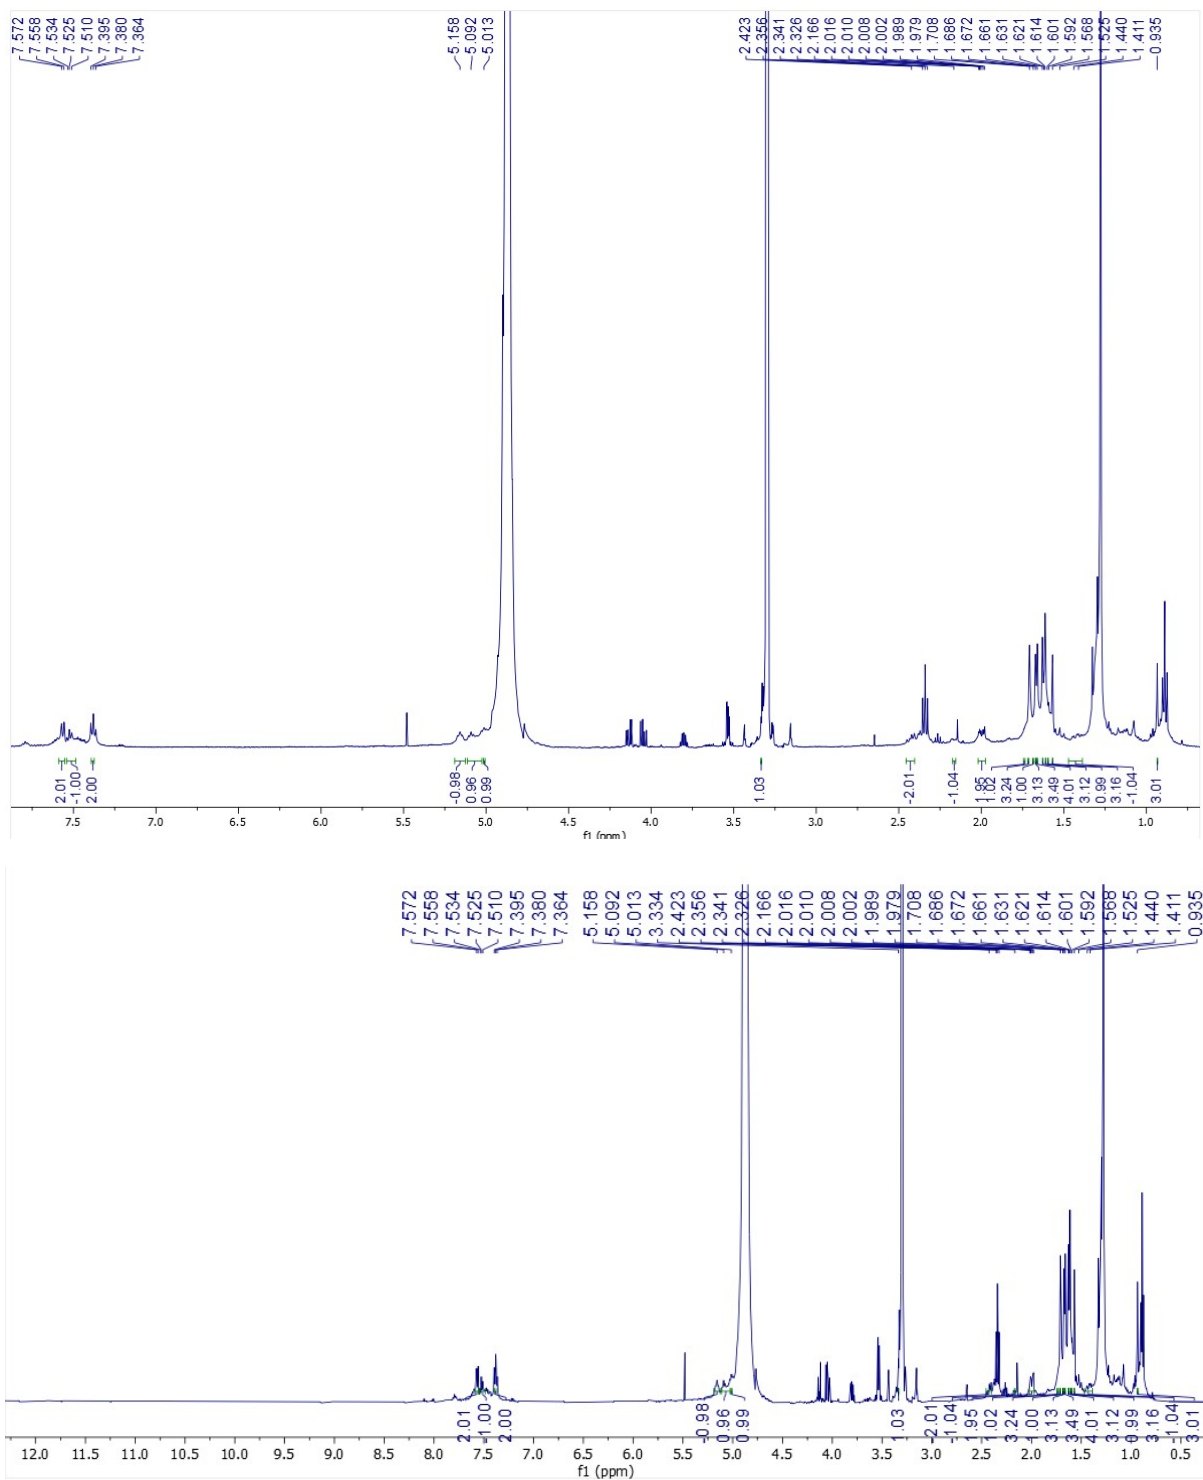

Figure S1H. The  $^1\text{H}$  NMR spectrum of **1** in methanol- $d_4$ .

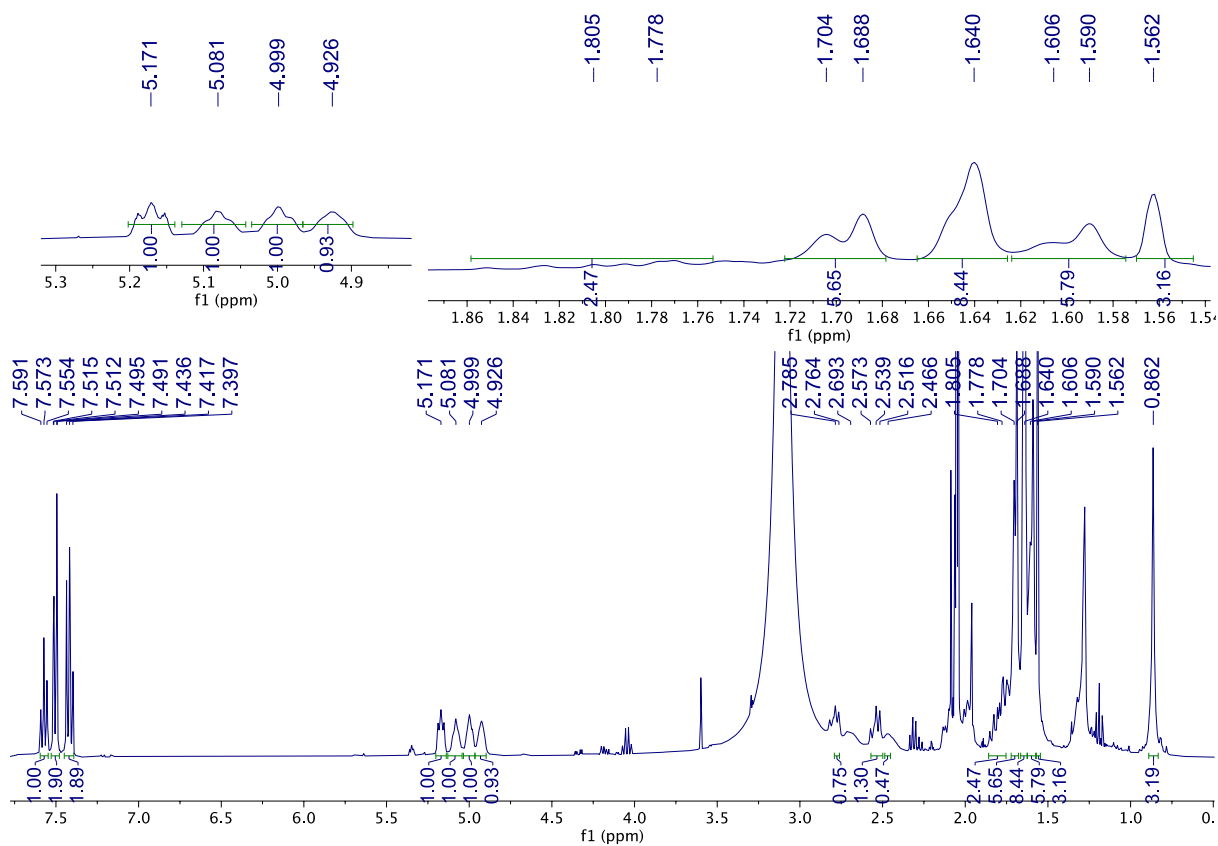

Figure S2A. The  $^1\text{H}$  NMR spectrum of **2** in acetone- $d_6$ .

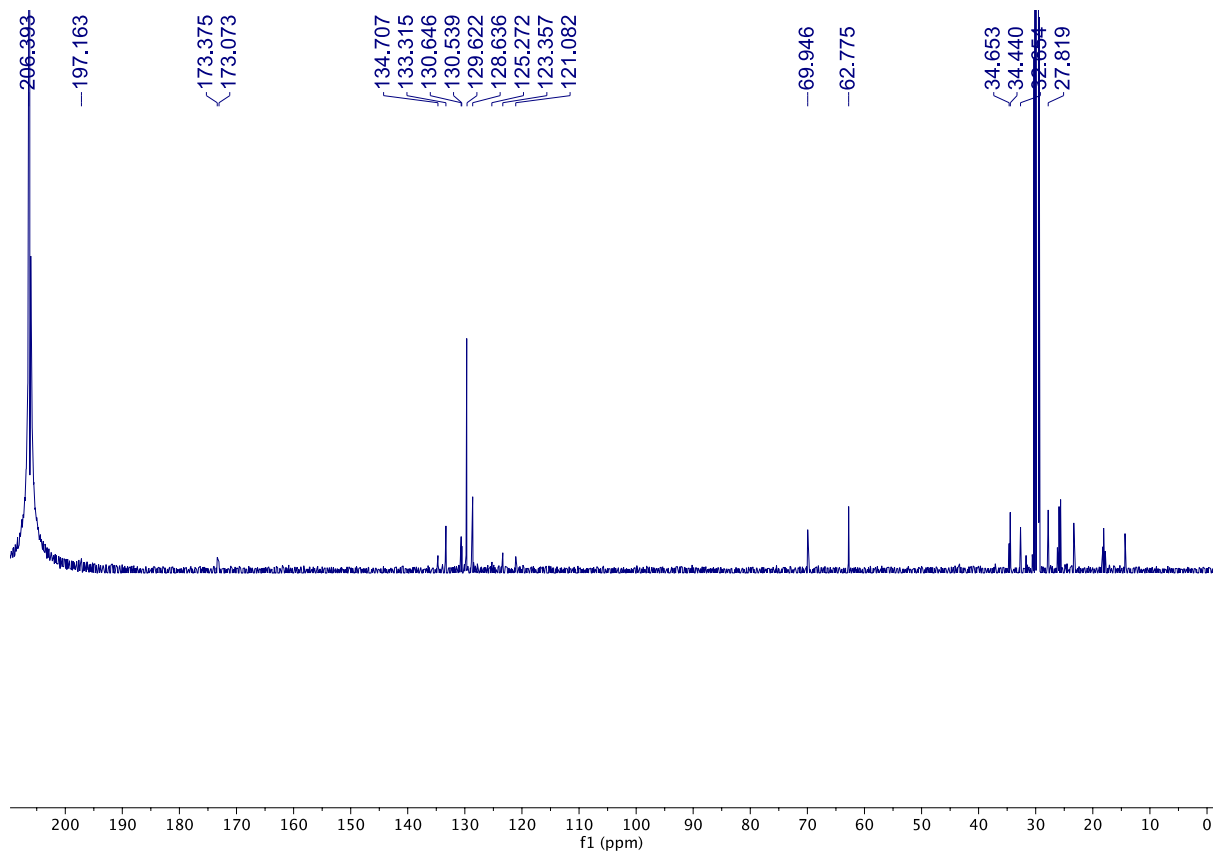

**Figure S2B.** The  $^{13}\text{C}$  NMR spectrum of **2** in acetone- $d_6$ .

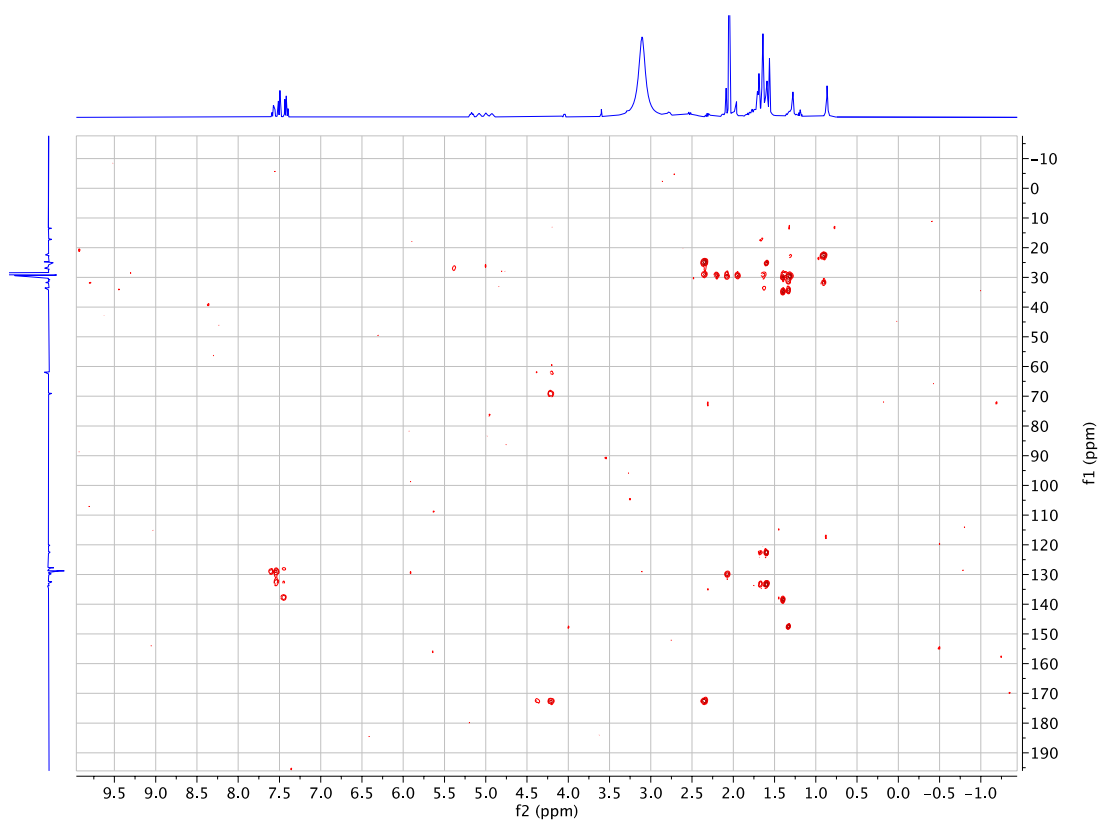

**Figure S2C.** The HMBC spectrum of **2** in acetone- $d_6$ .

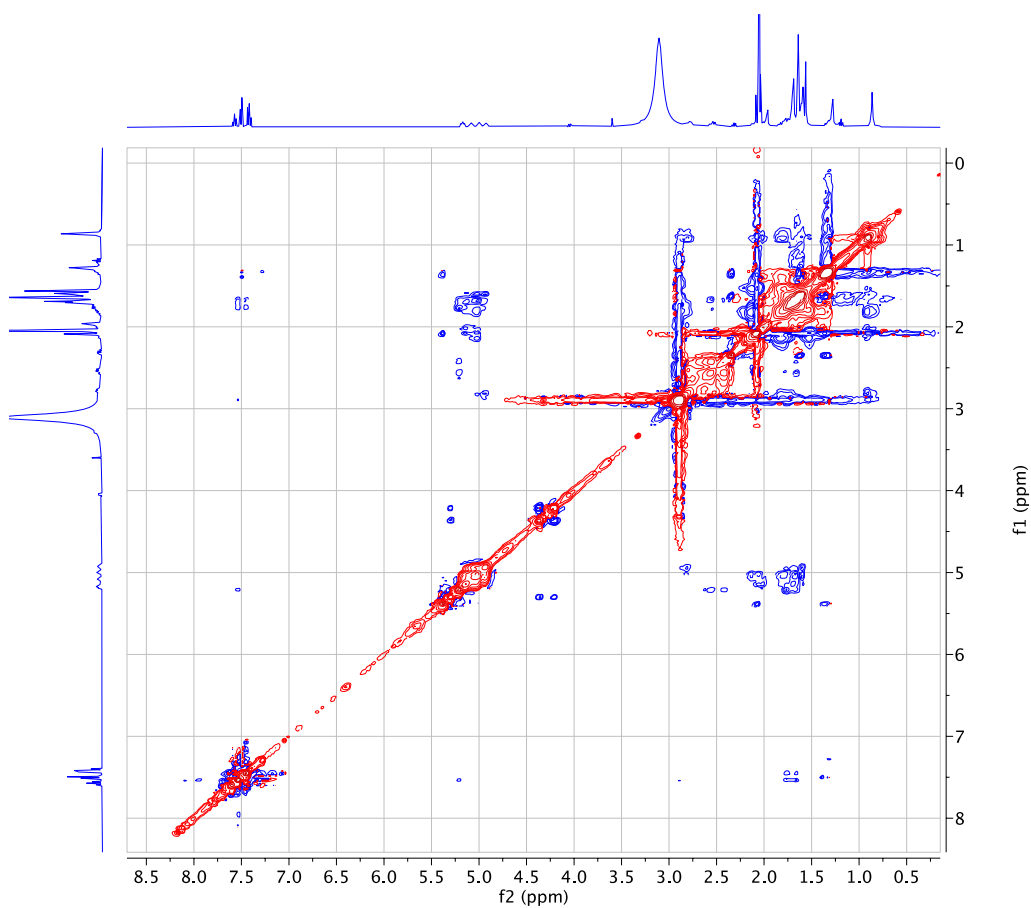

Figure S2D. The NOESY spectrum of **2** in acetone-*d*<sub>6</sub>.

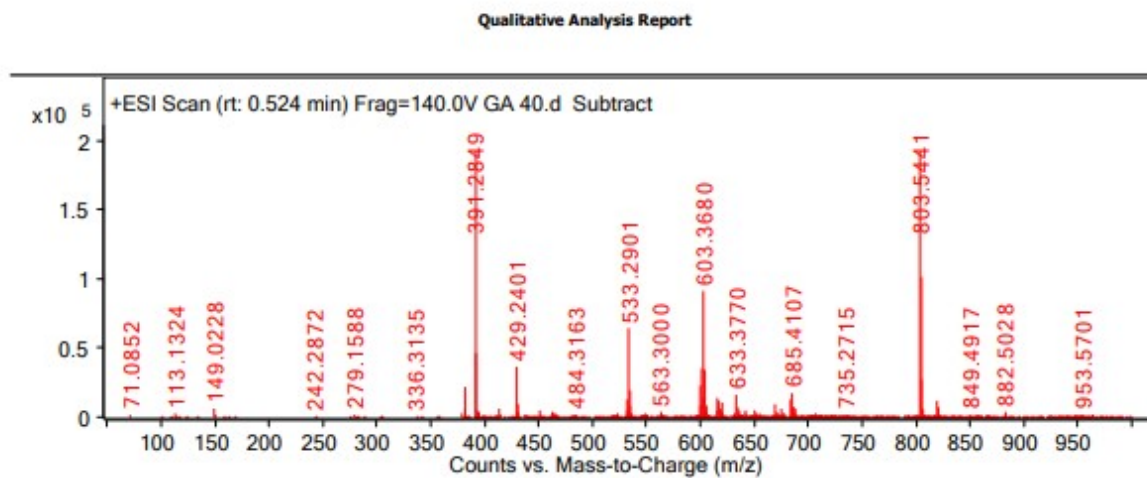

Figure S3A. The HRESIMS spectrum of **3**.

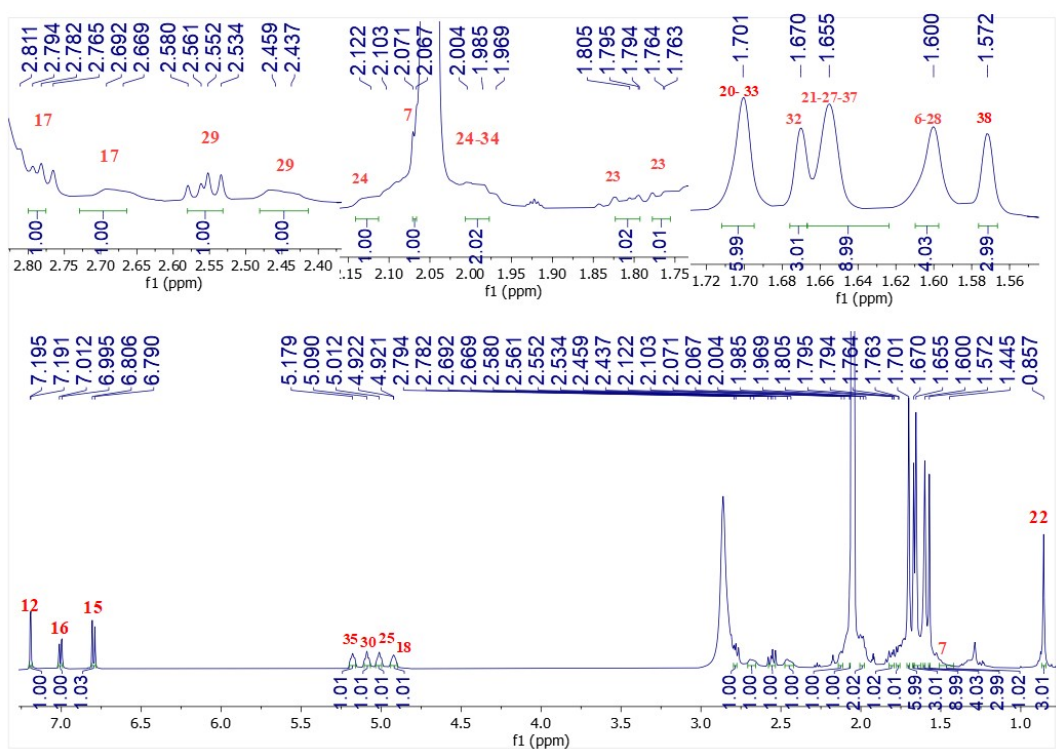

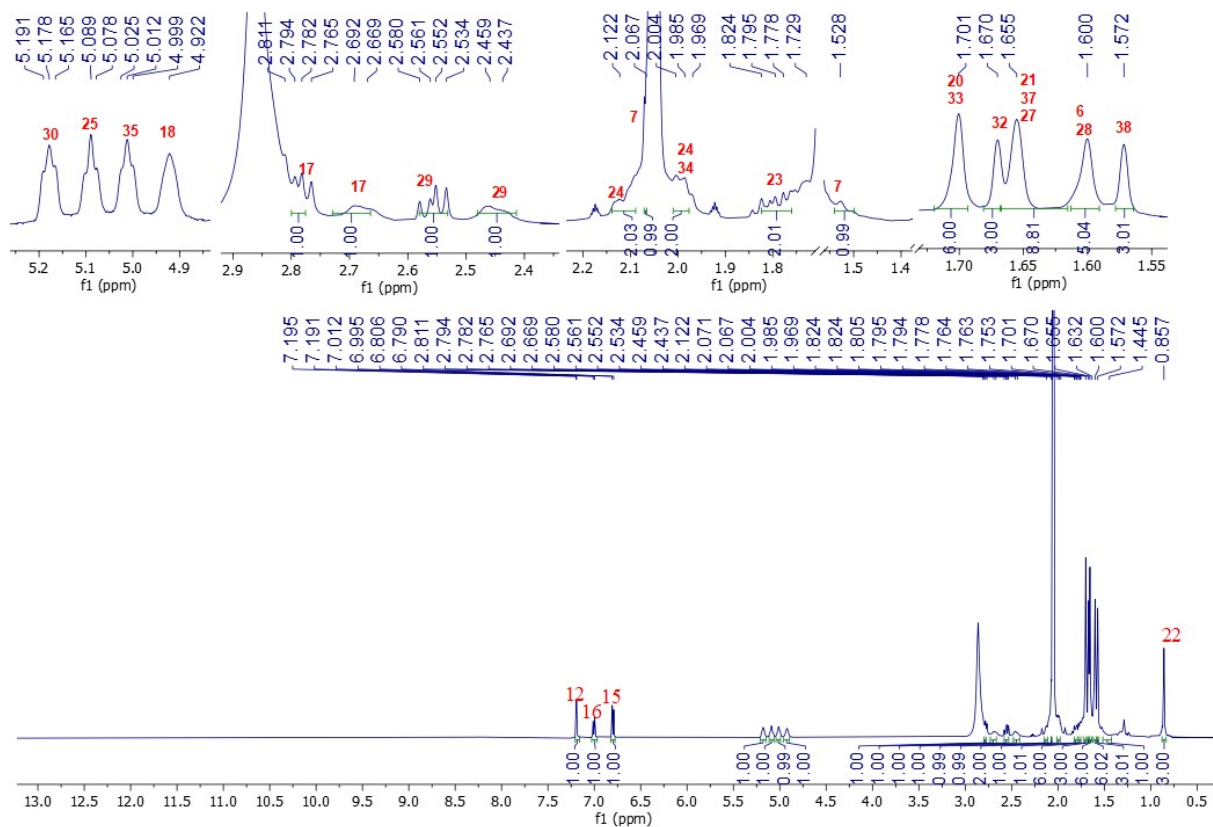

Figure S3B. The  $^1\text{H}$  NMR spectrum of **3** in acetone- $d_6$ .

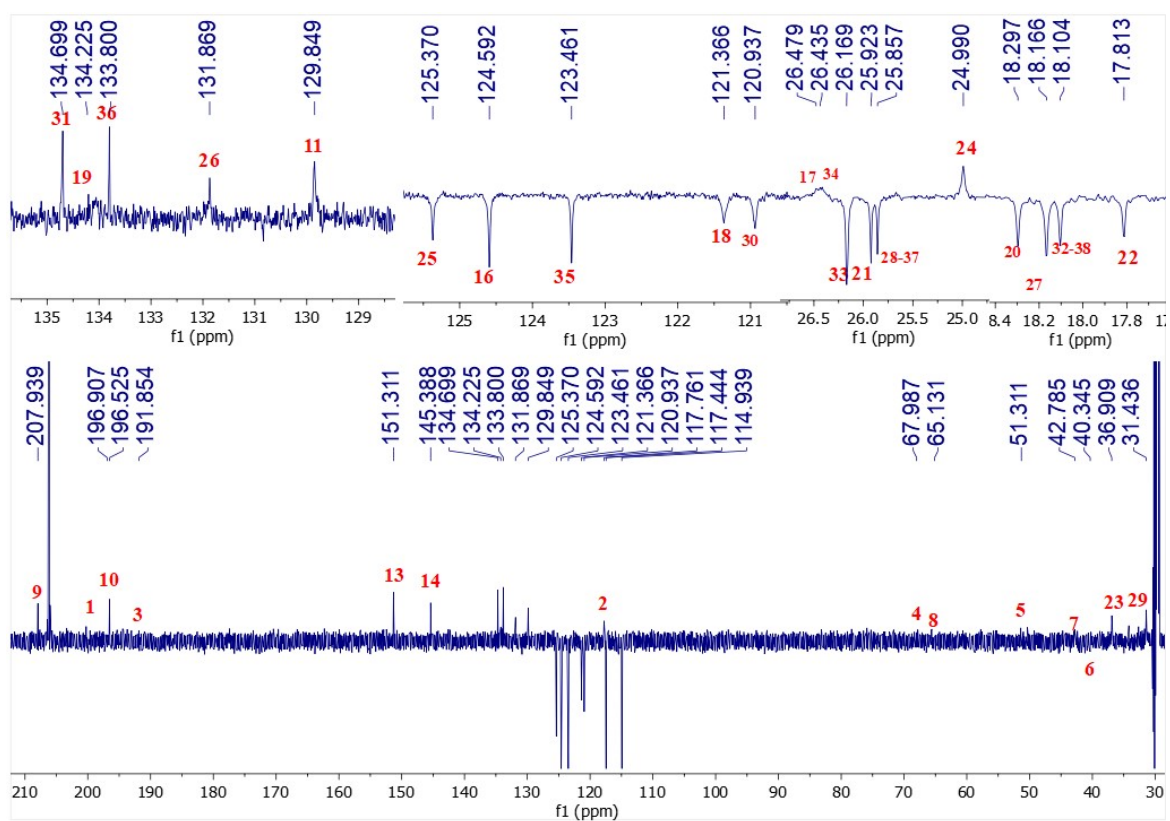

Figure S3C. The  $^{13}\text{C}$  NMR spectrum of **3** in acetone- $d_6$ .

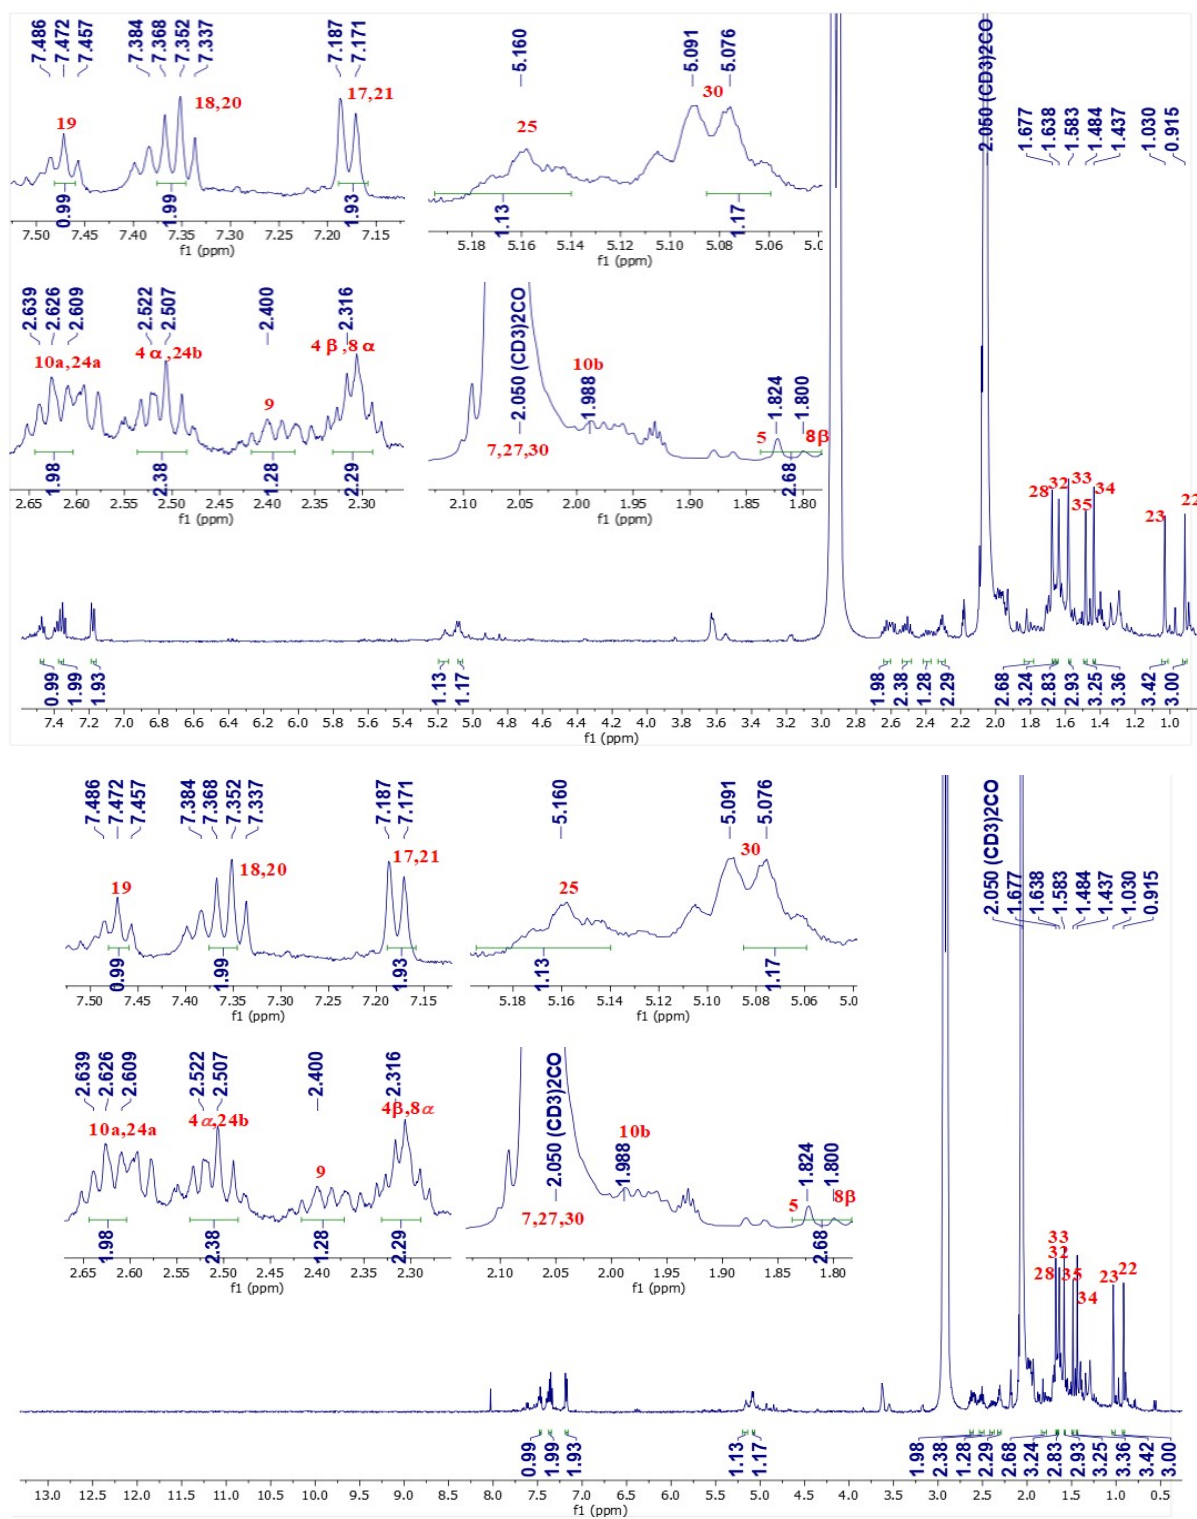

Figure S4A. The  $^1\text{H}$  NMR spectrum of **4** in acetone- $d_6$ .

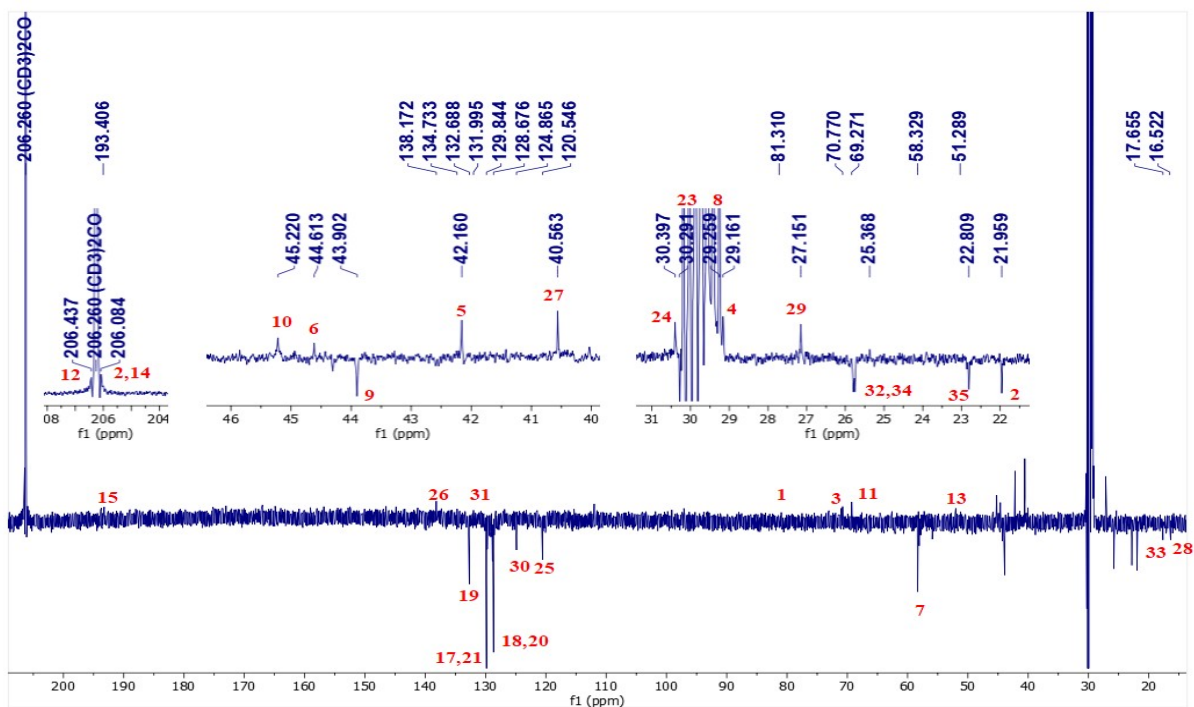

Figure S4B. The  $^{13}\text{C}$  NMR spectrum of **4** in acetone- $d_6$ .

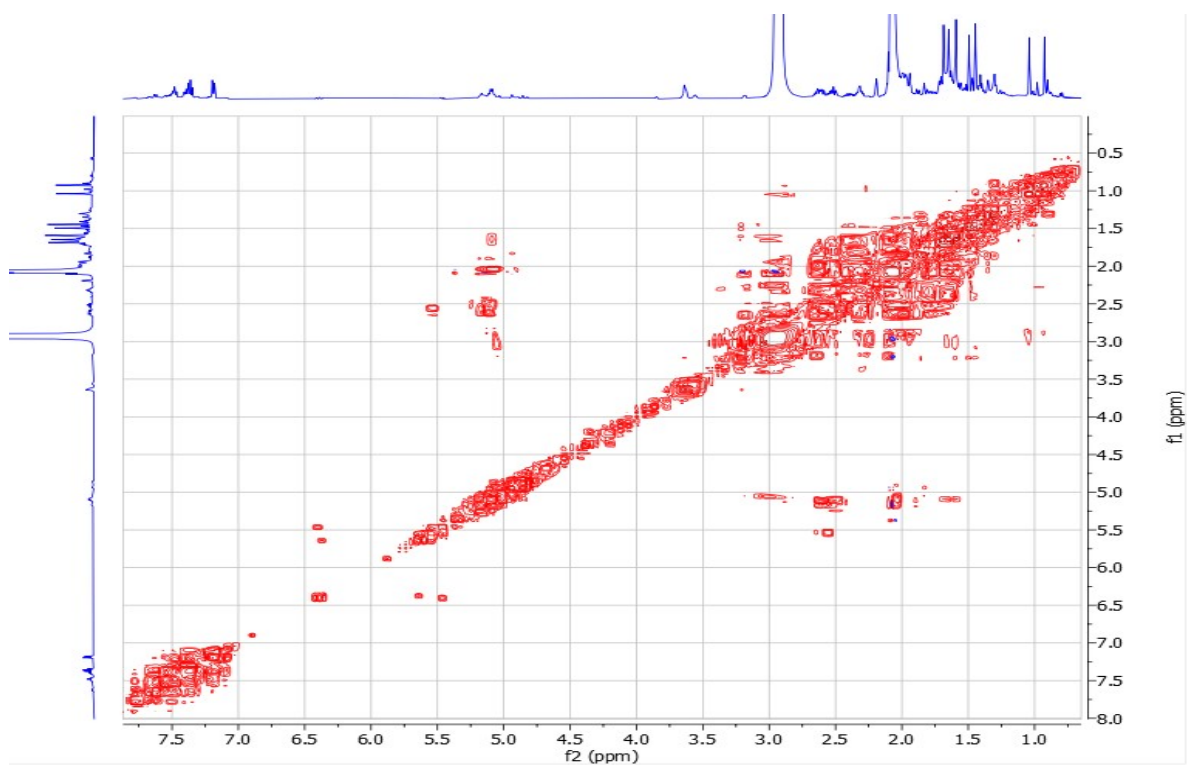

Figure S4C. The COSY spectrum of **4** in acetone- $d_6$ .



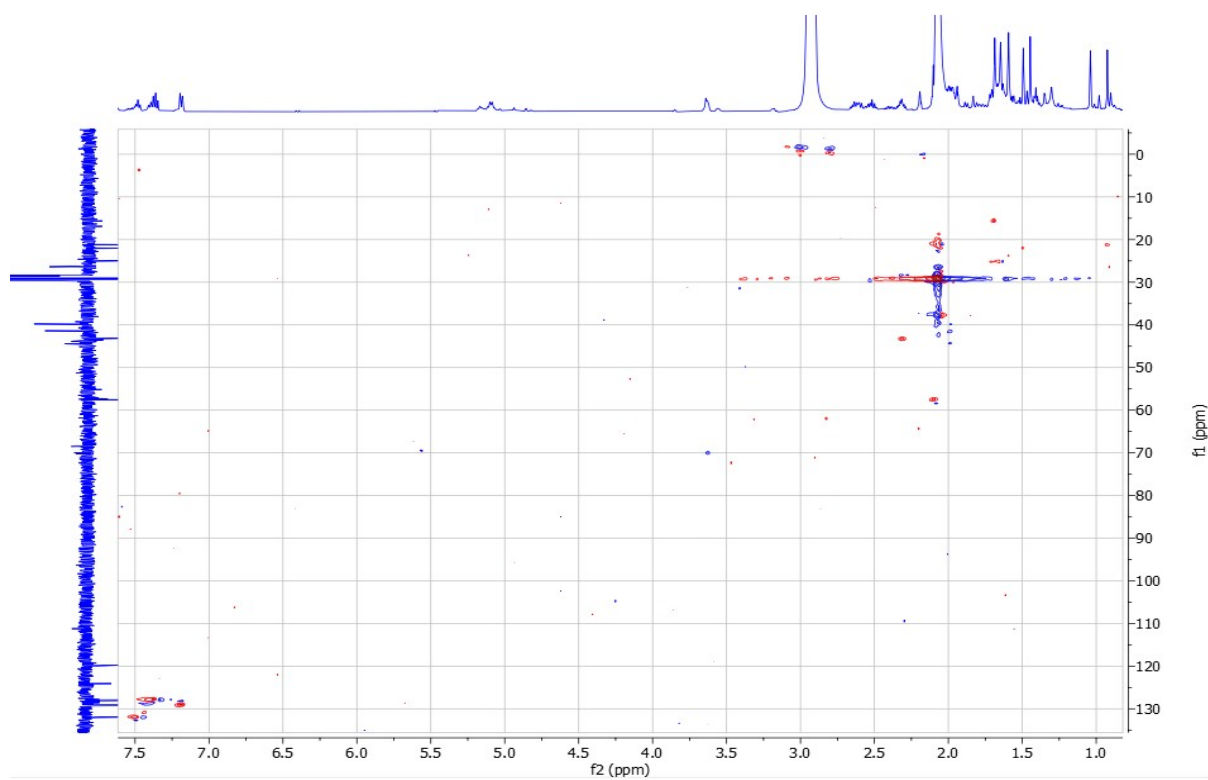

**Figure S4D.** The HSQC spectrum of **4** in acetone- $d_6$ .

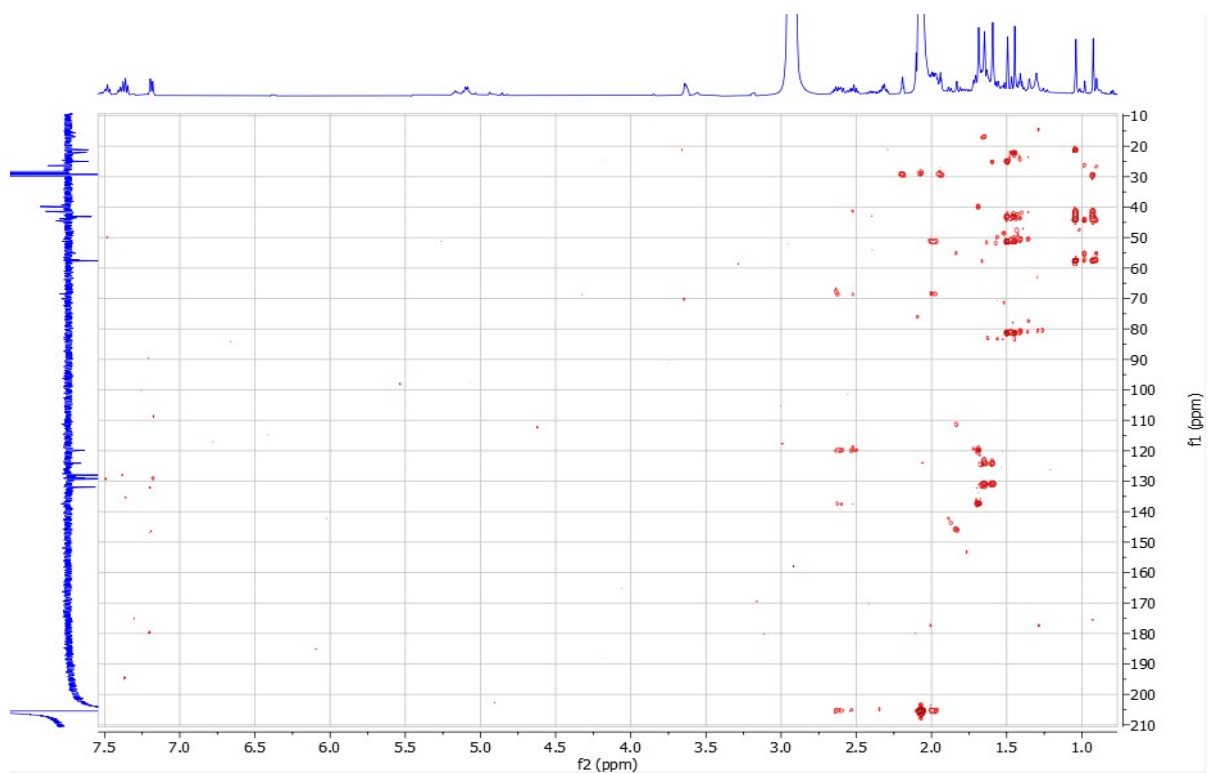

**Figure S4E.** The HMBC spectrum of **4** in acetone- $d_6$ .

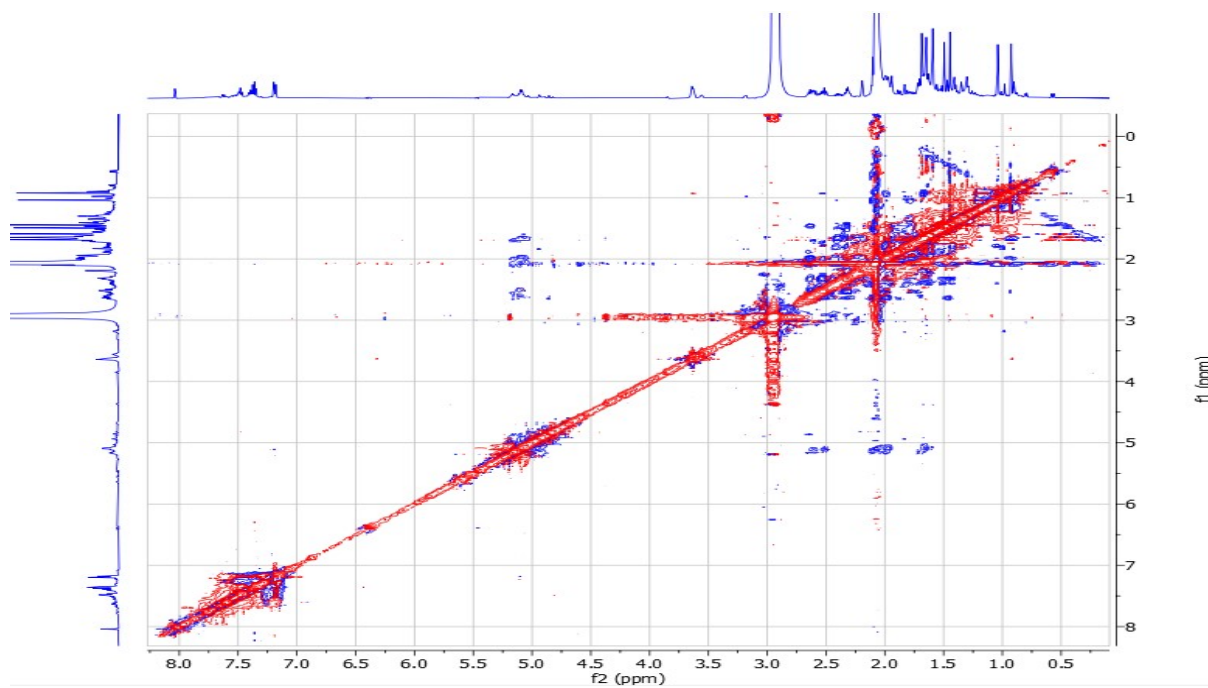

**Figure S4F.** The NOESY spectrum of **4** in acetone- $d_6$ .

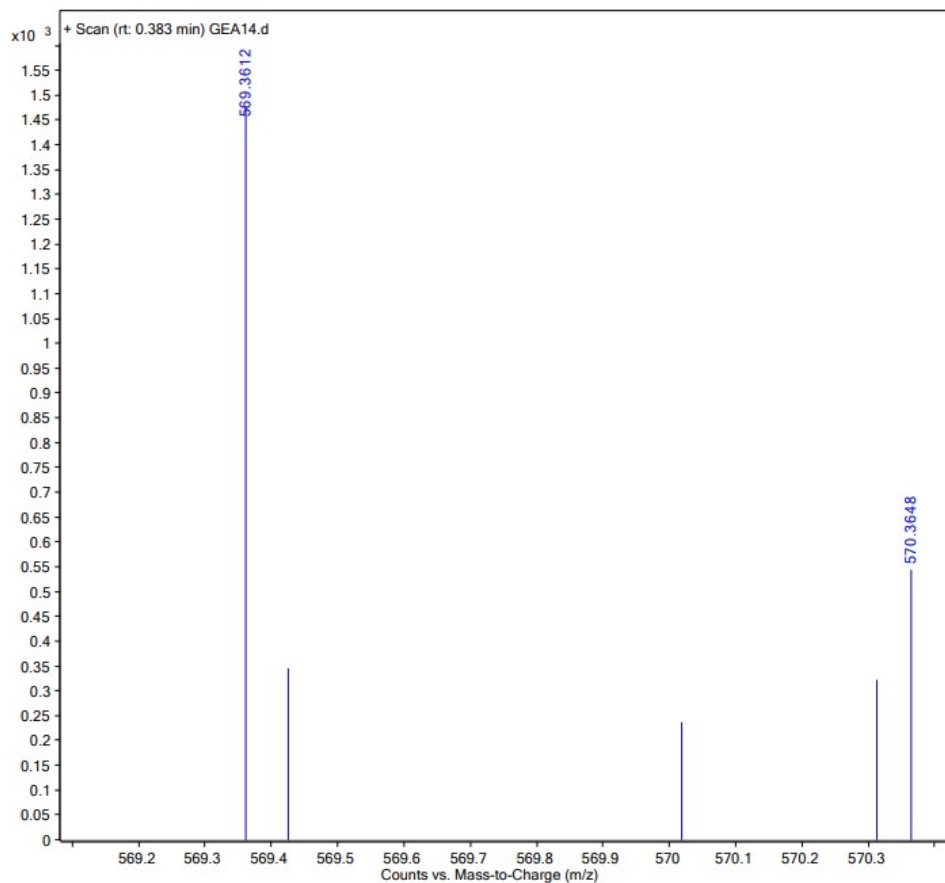

Figure S5A. The HRESIMS spectrum of **5**.

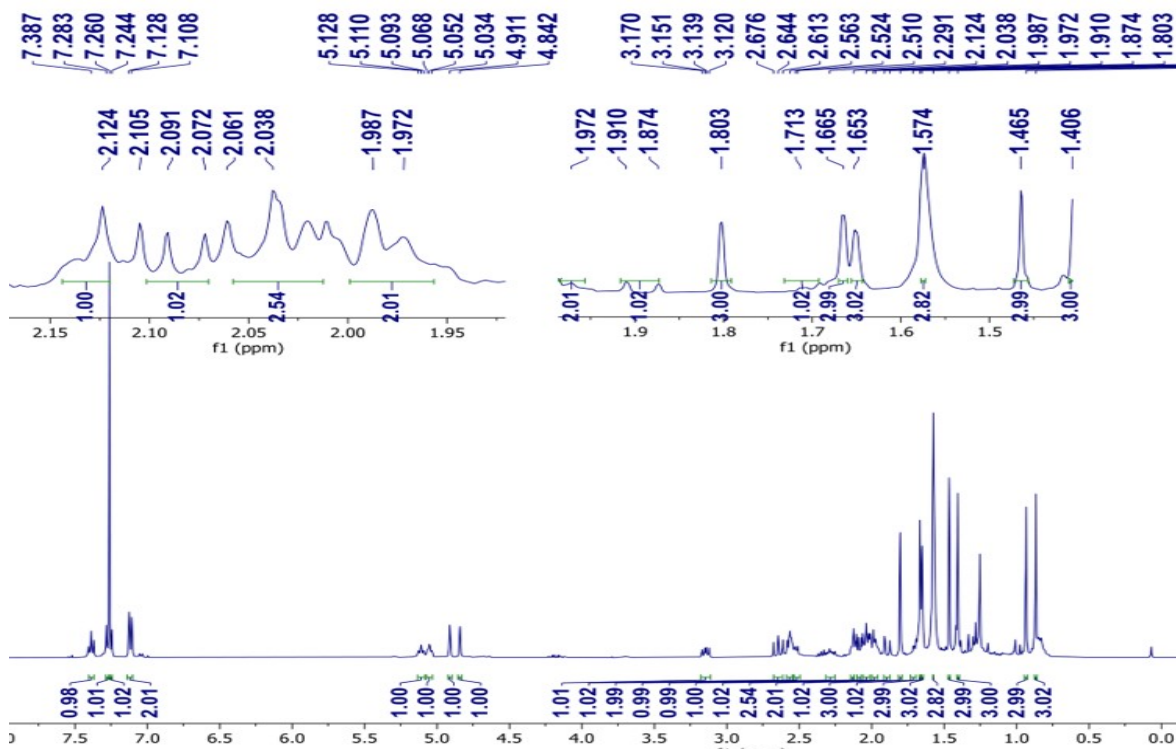

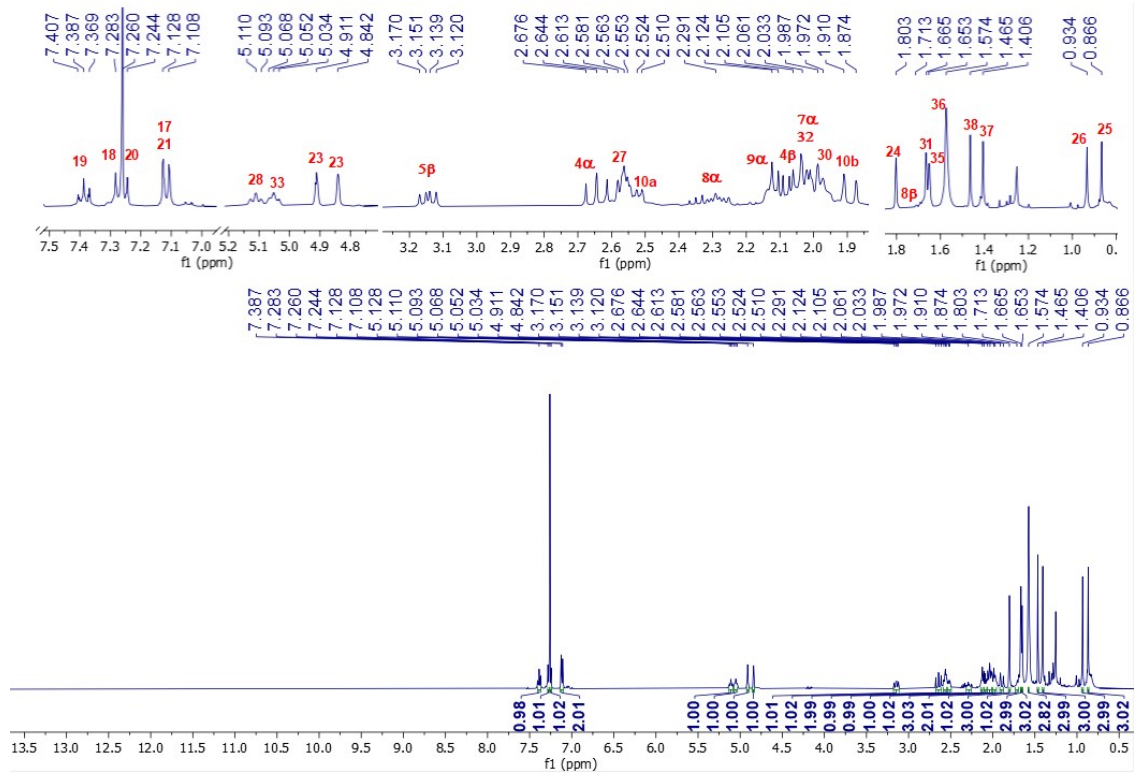

Figure S5B. The  $^1\text{H}$  NMR spectrum of **5** in  $\text{CDCl}_3$ .

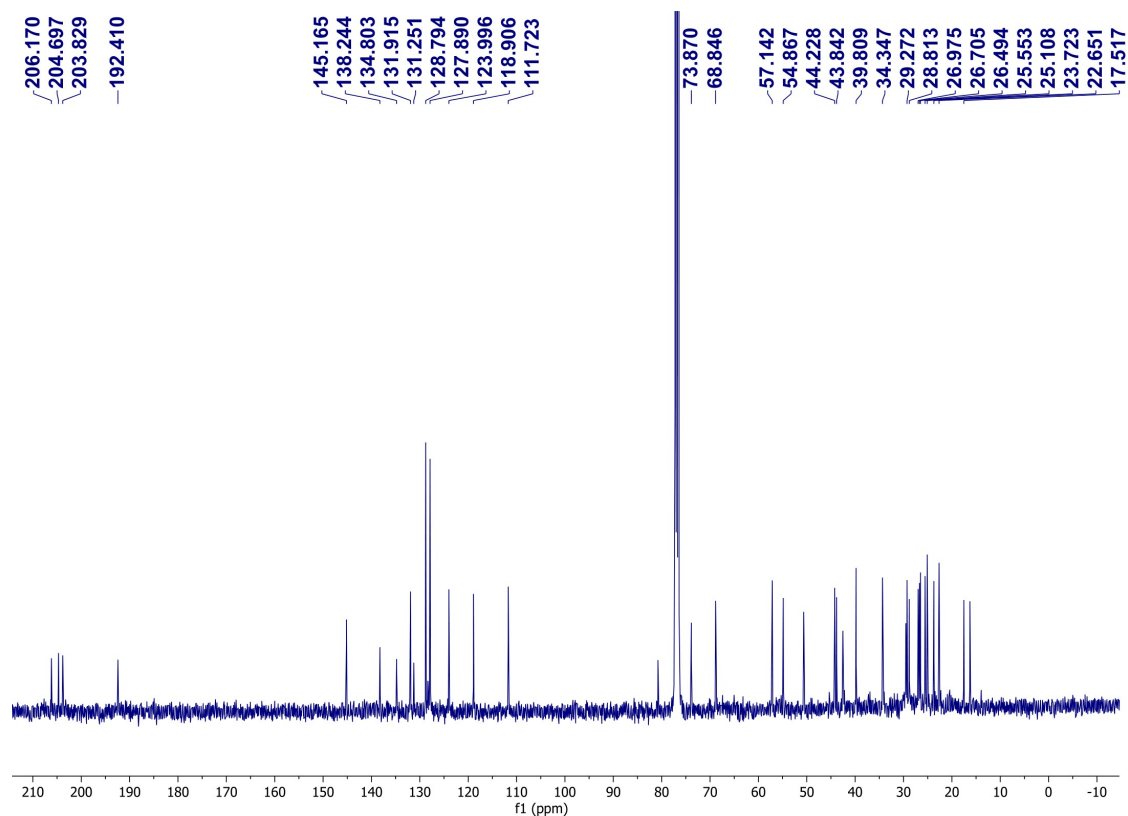

Figure S5C. The  $^{13}\text{C}$  NMR spectrum of **5** in  $\text{CDCl}_3$ .

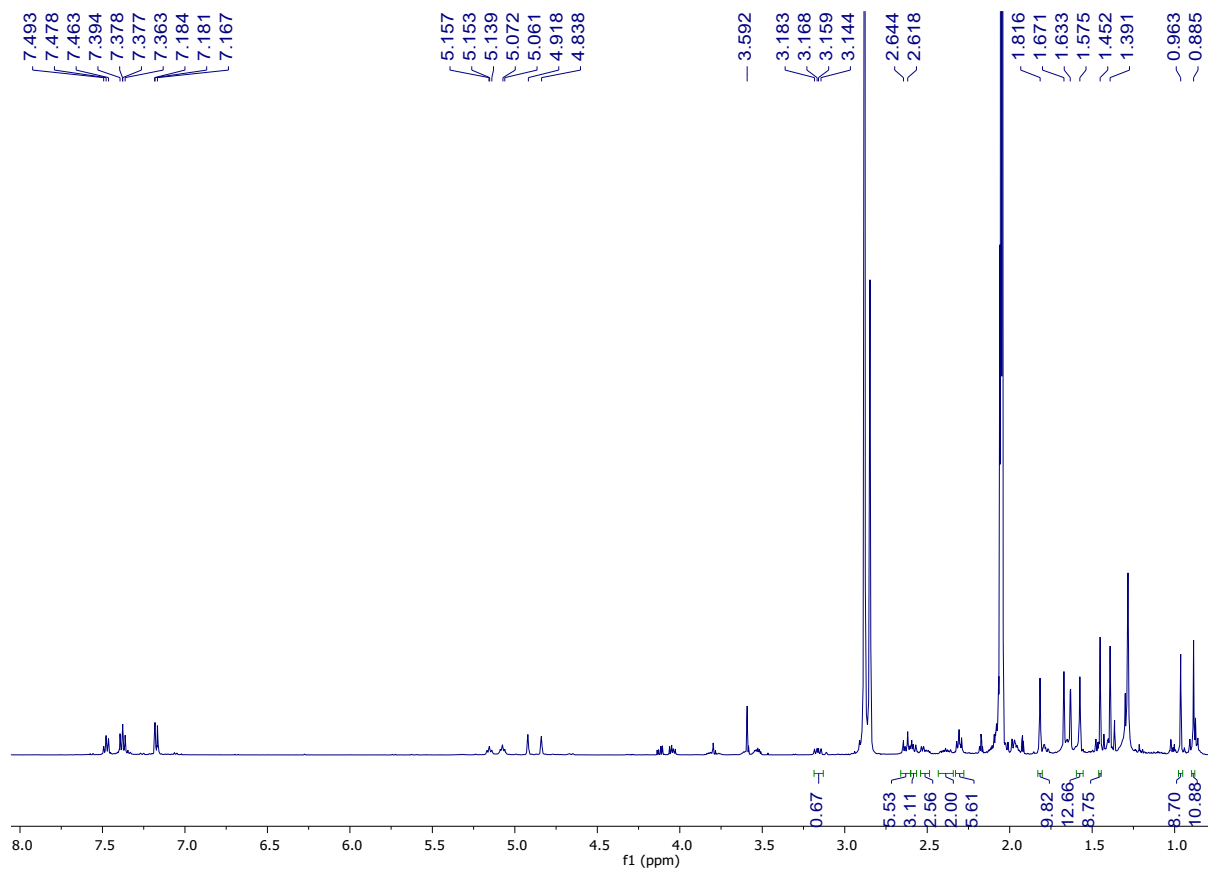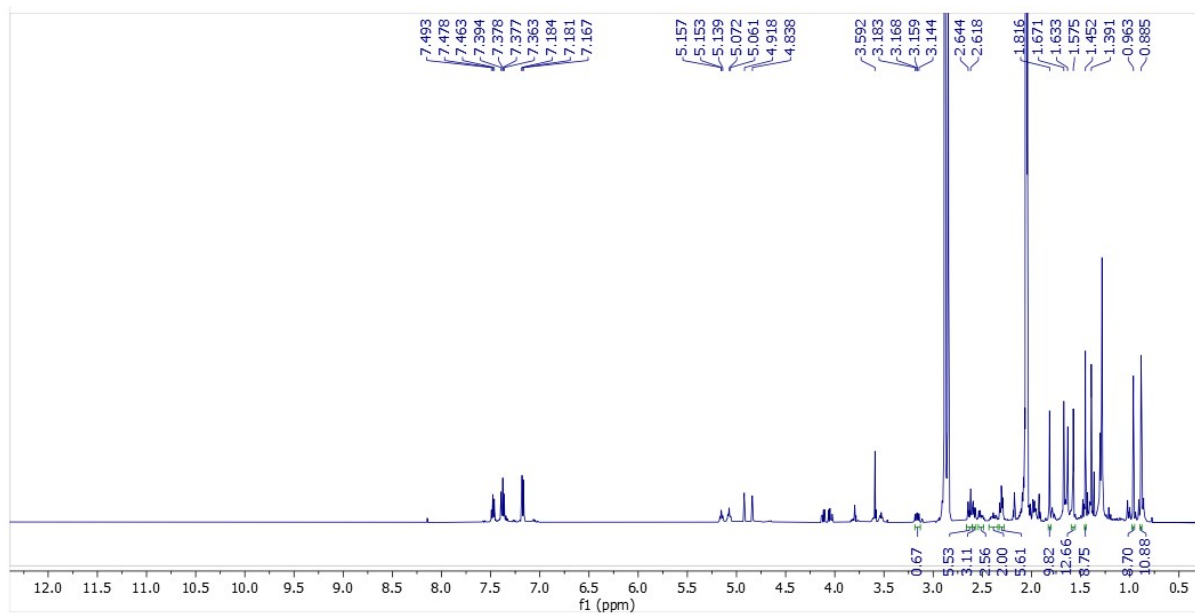

Figure S5D. The  $^1\text{H}$  NMR spectrum of **5** in acetone- $d_6$ .

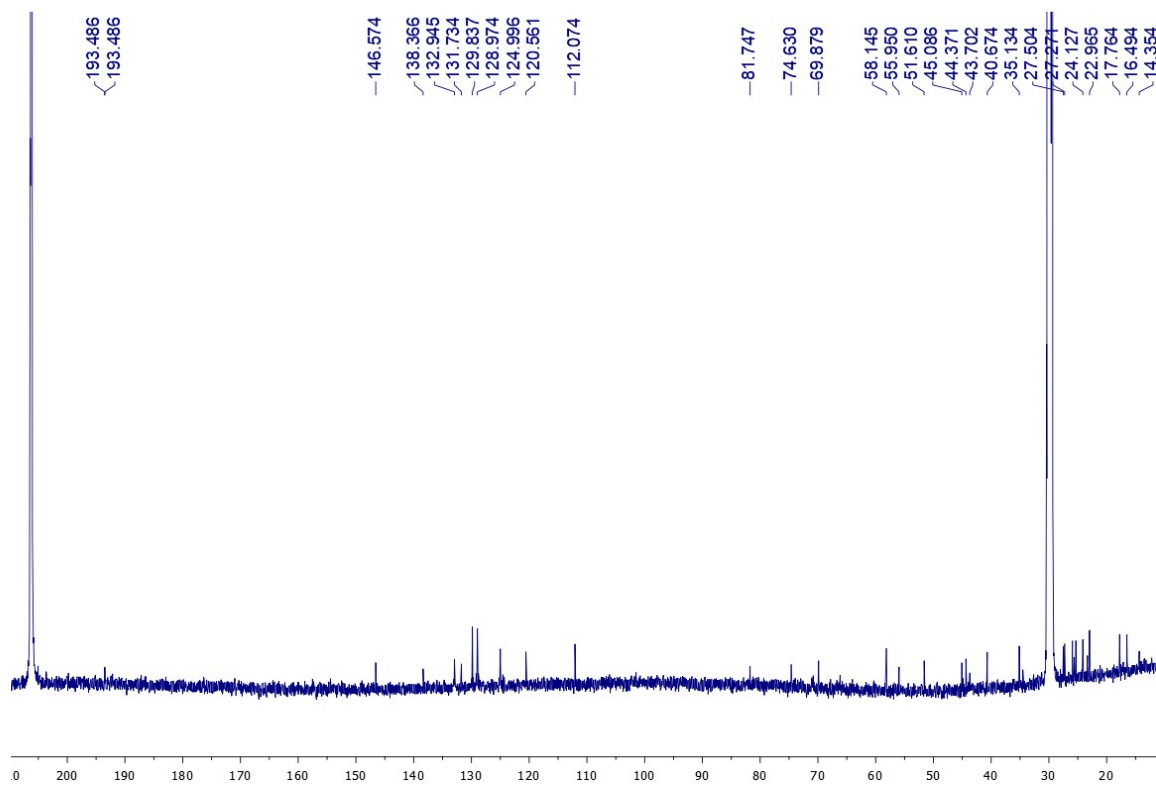

Figure S5E. The  $^{13}\text{C}$  NMR spectrum of **5** in acetone- $d_6$ .

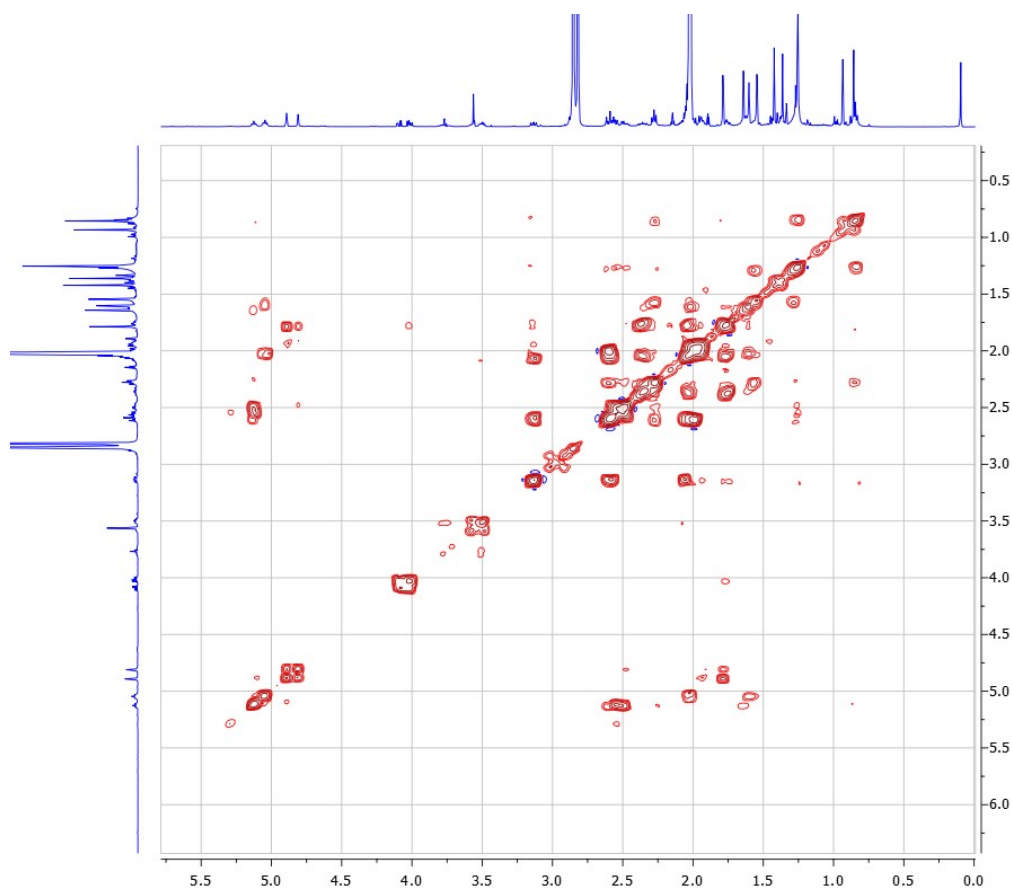

Figure S5F. The COSY spectrum of **5** in acetone- $d_6$ .

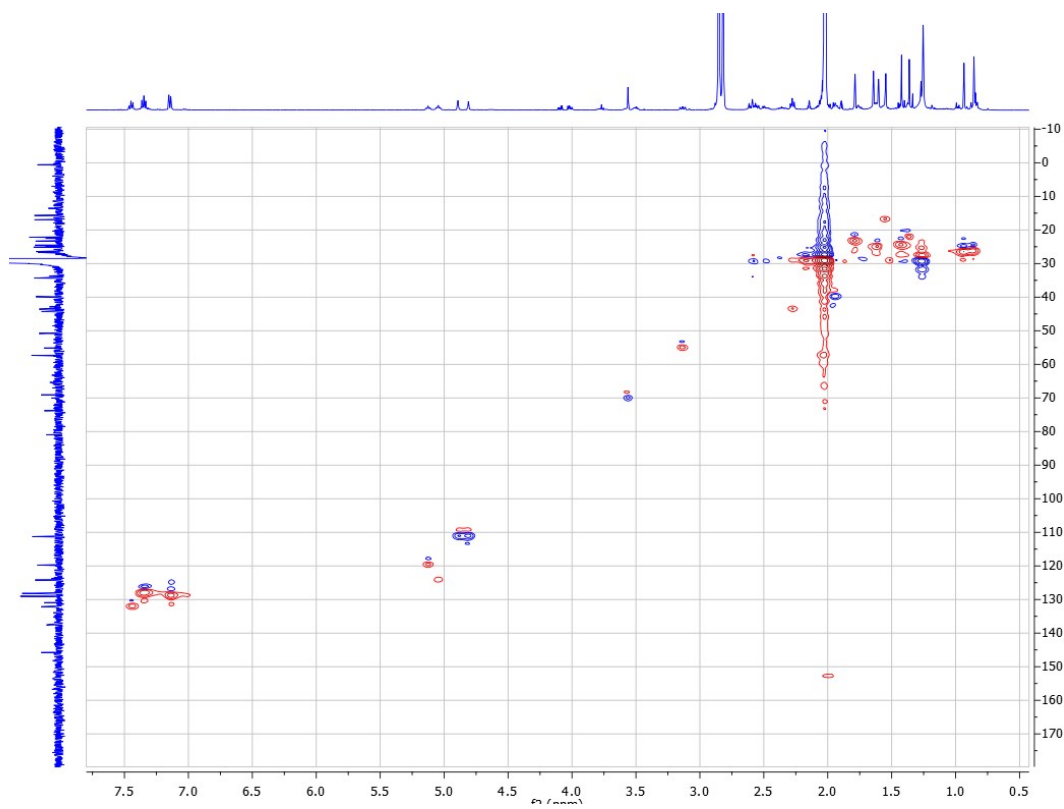

**Figure S5G.** The HSQC spectrum of **5** in acetone- $d_6$ .

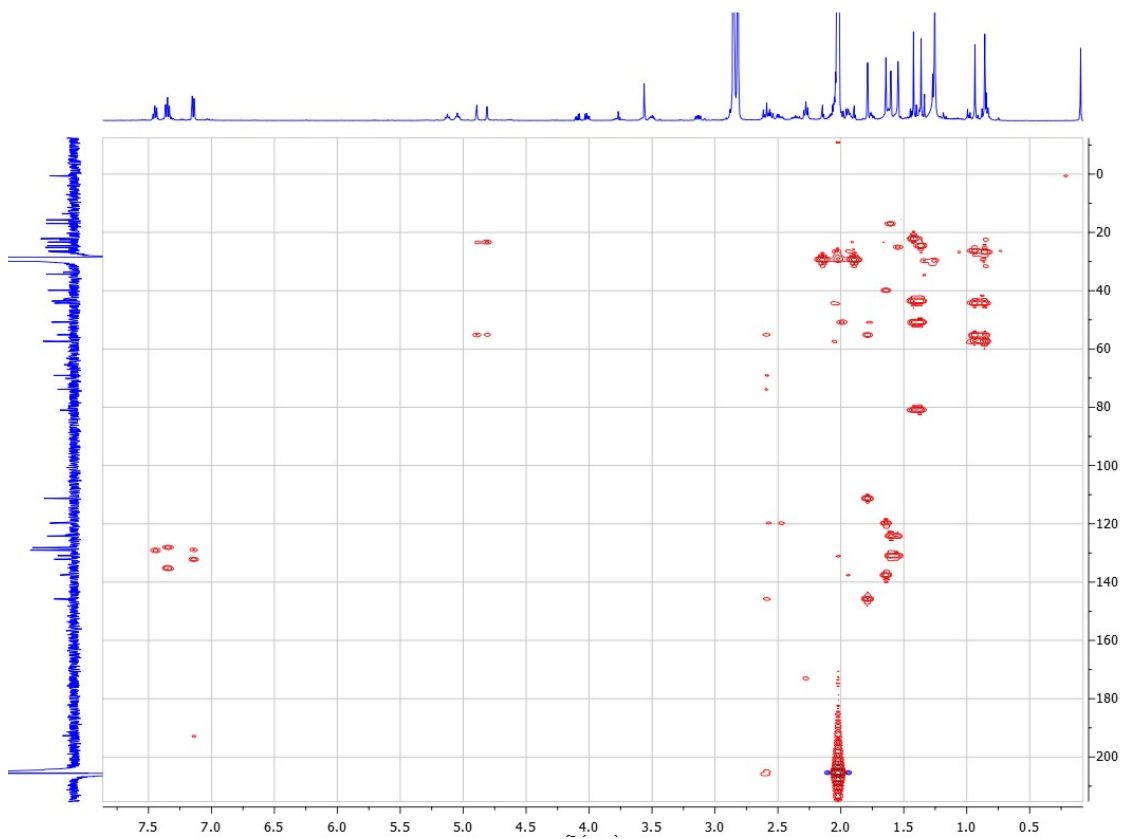

**Figure S5H.** The HMBC spectrum of **5** in acetone- $d_6$ .

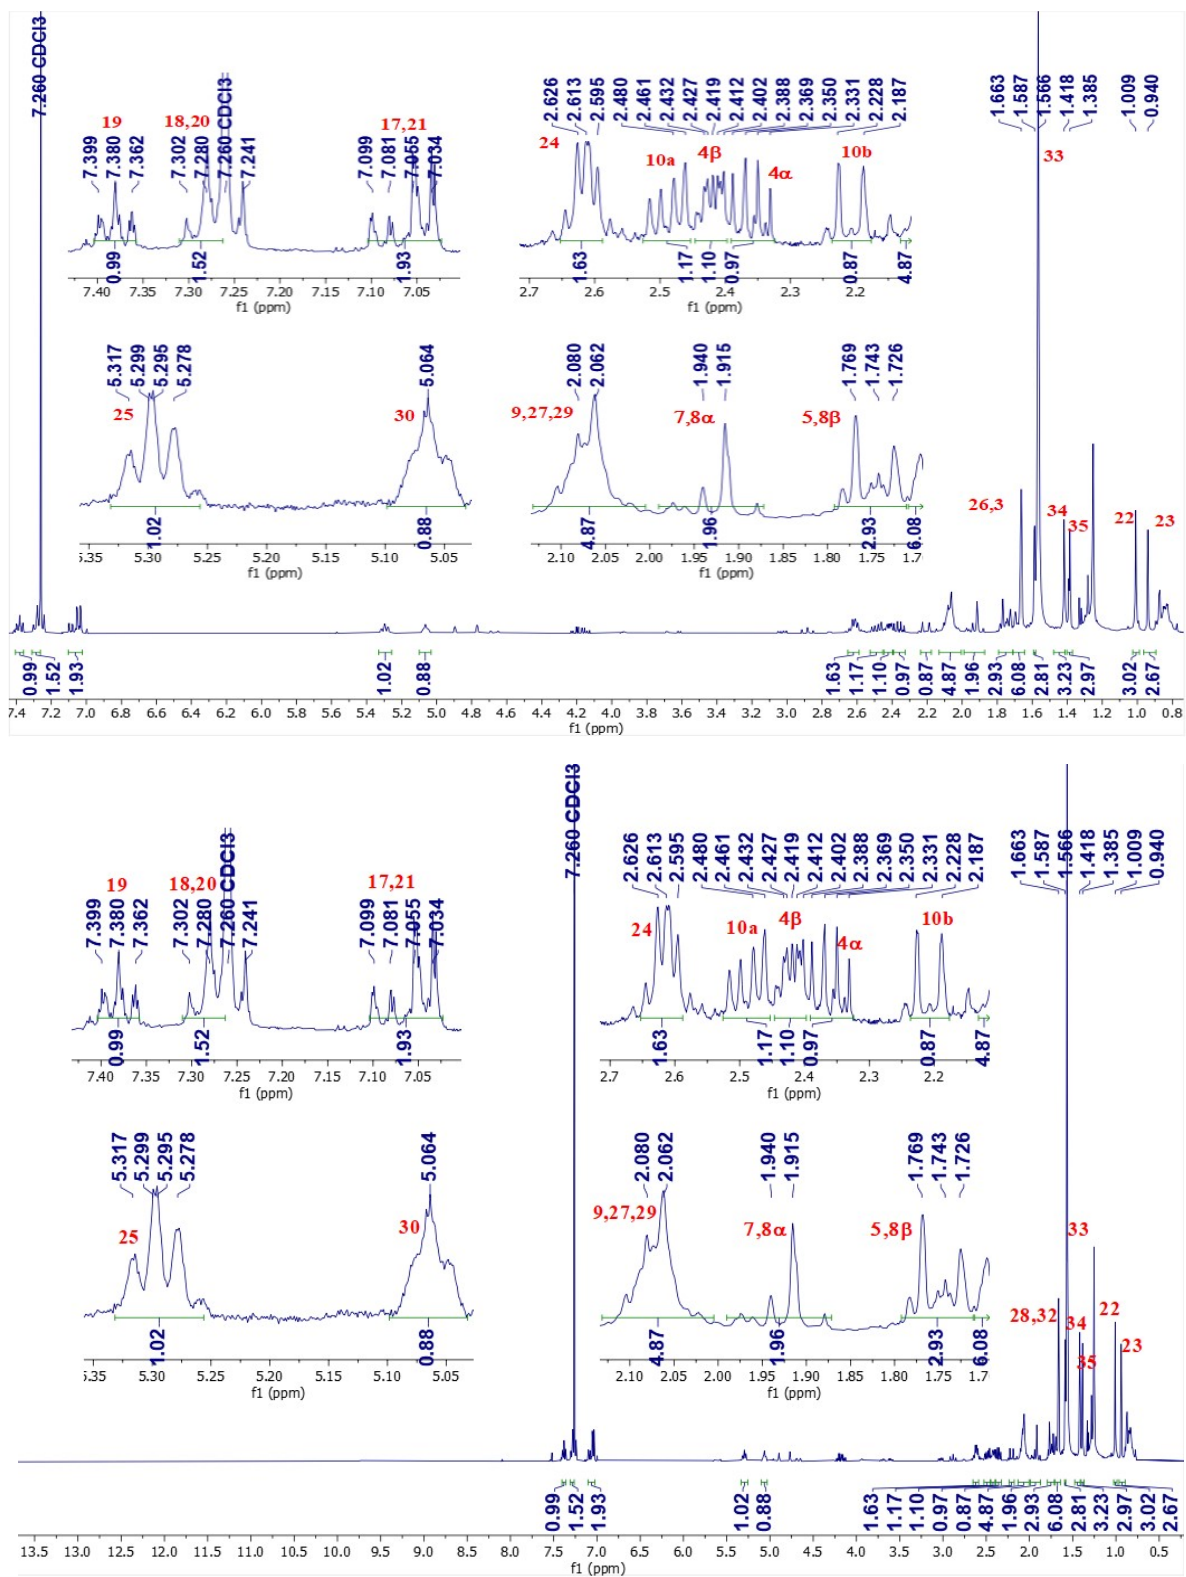

Figure S6A. The <sup>1</sup>H NMR spectrum of 6 in CDCl<sub>3</sub>.



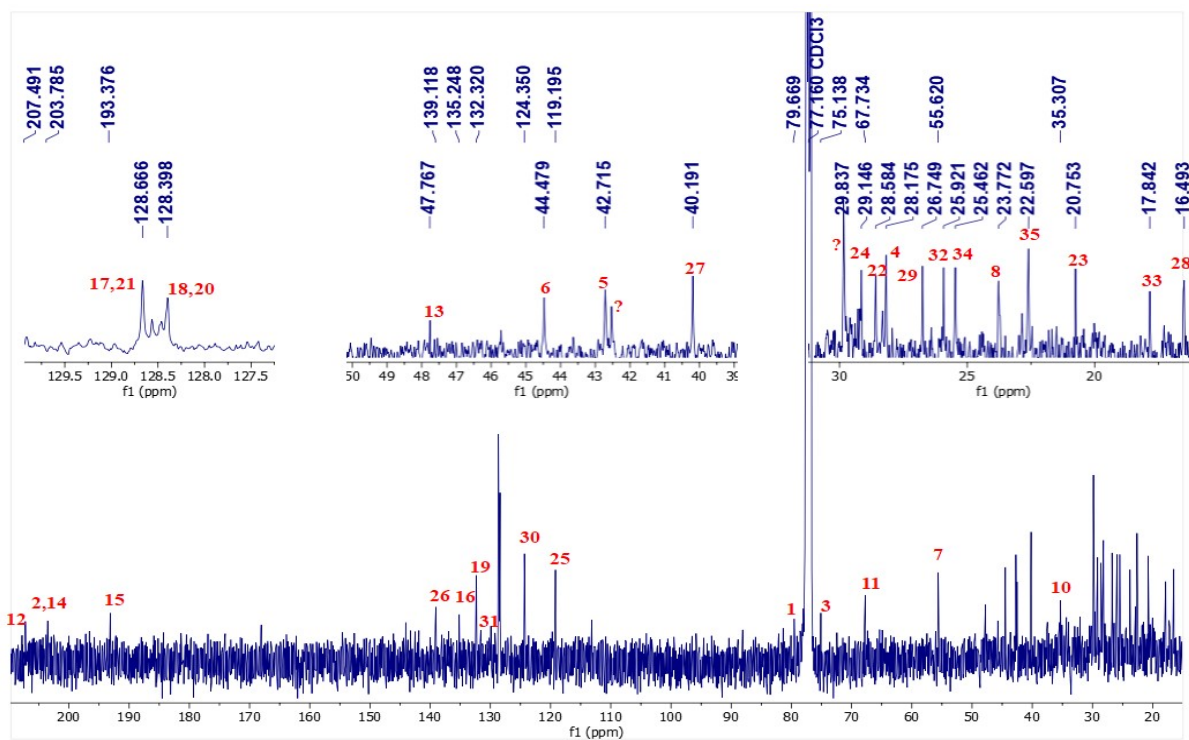

Figure S6B. The  $^{13}\text{C}$  NMR spectrum of **6** in  $\text{CDCl}_3$ .

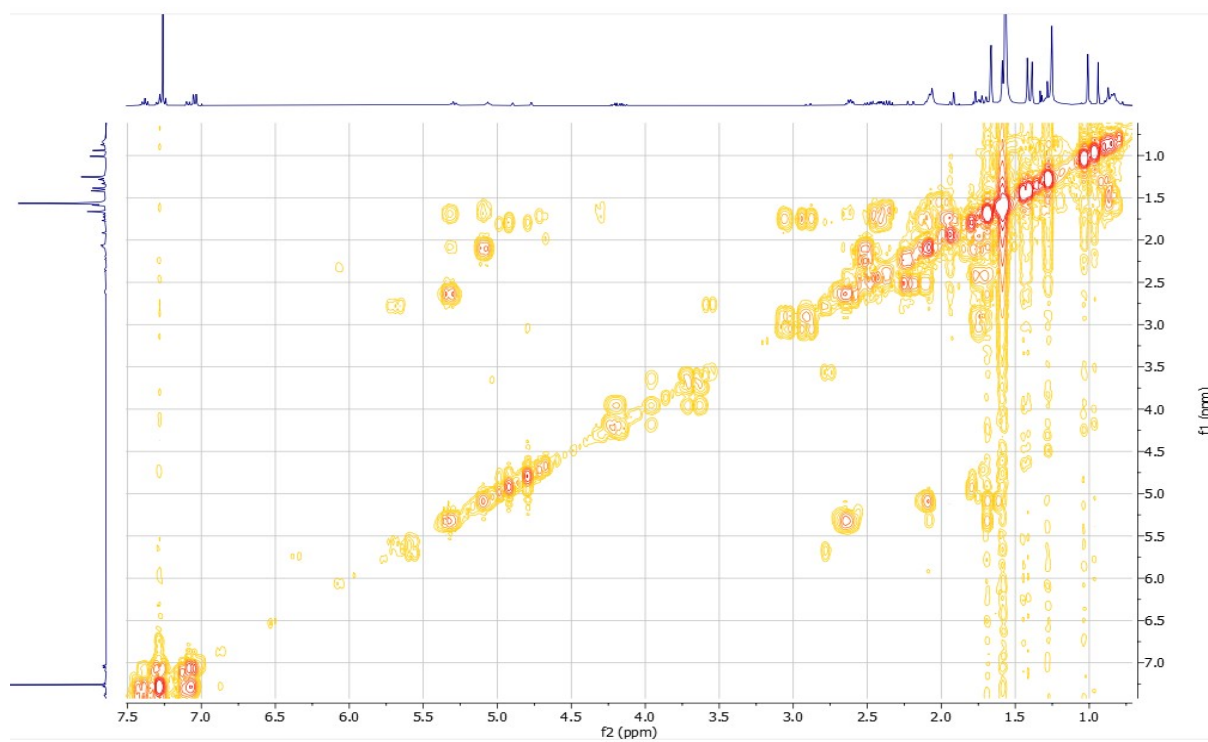

Figure S6C. The COSY spectrum of **6** in  $\text{CDCl}_3$ .

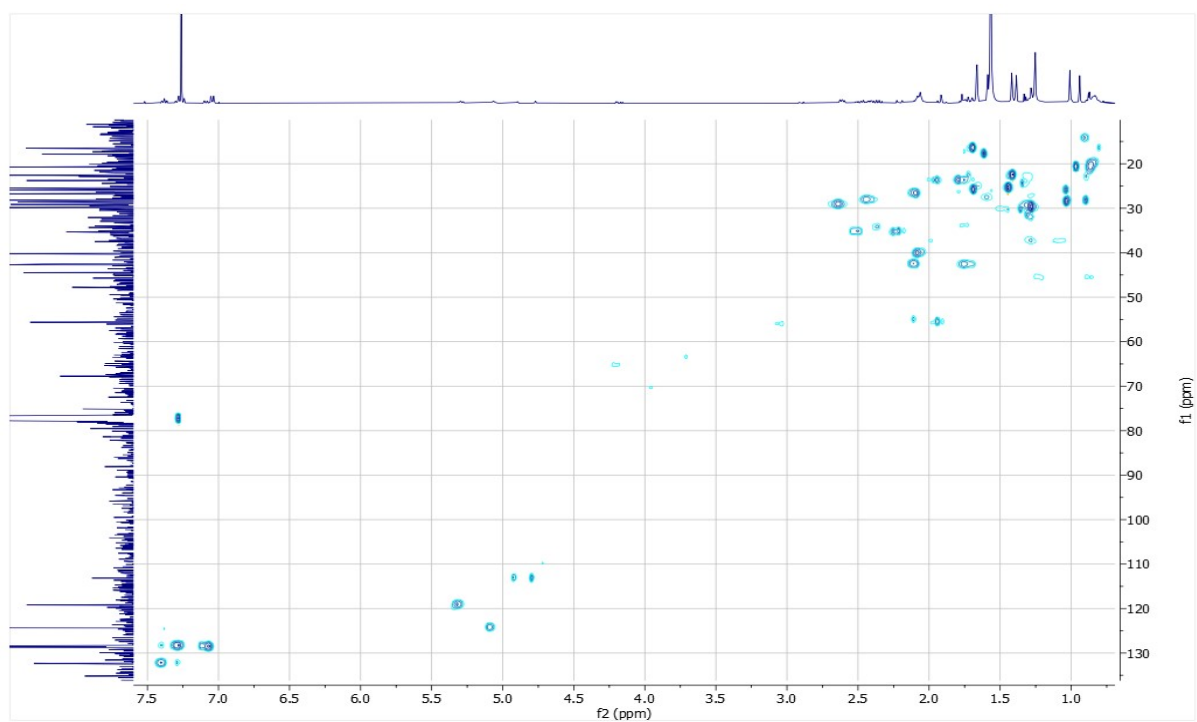

**Figure S6D.** The HSQC spectrum of **6** in  $\text{CDCl}_3$ .

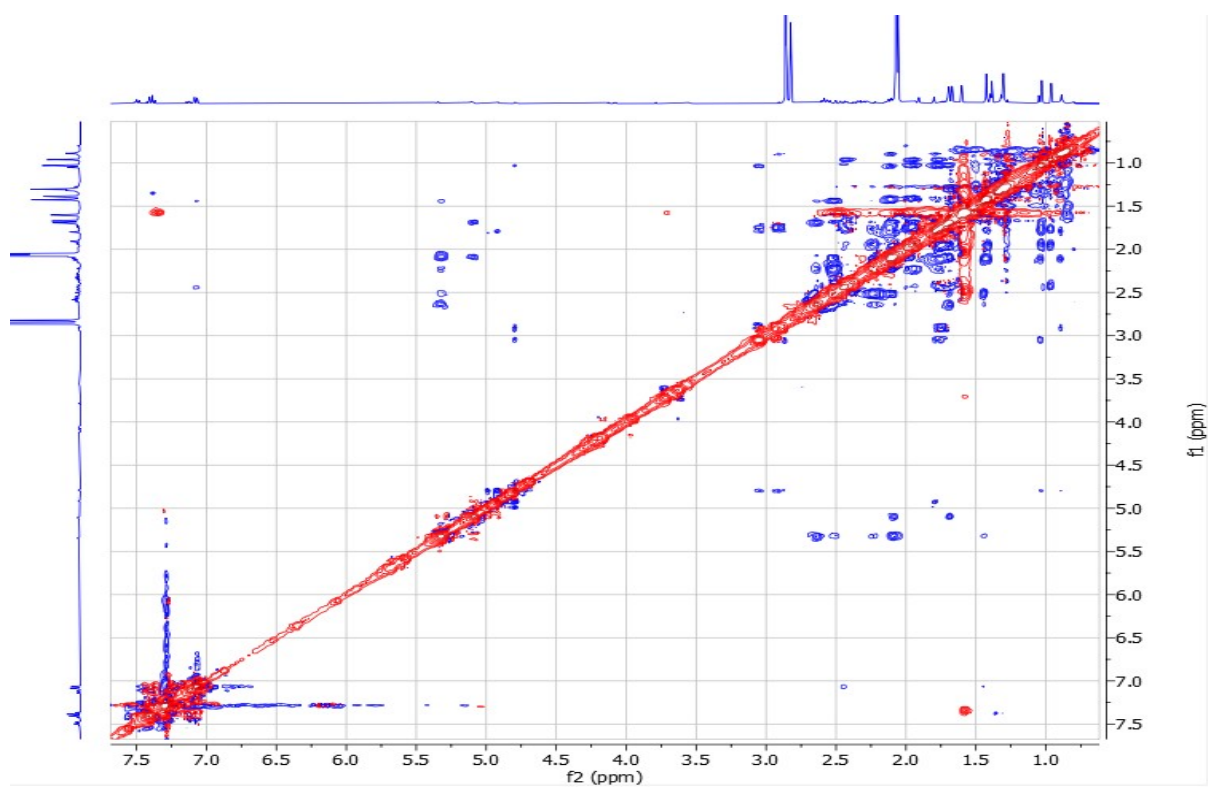

**Figure S6E.** The NOESY spectrum of **6** in  $\text{CDCl}_3$ .

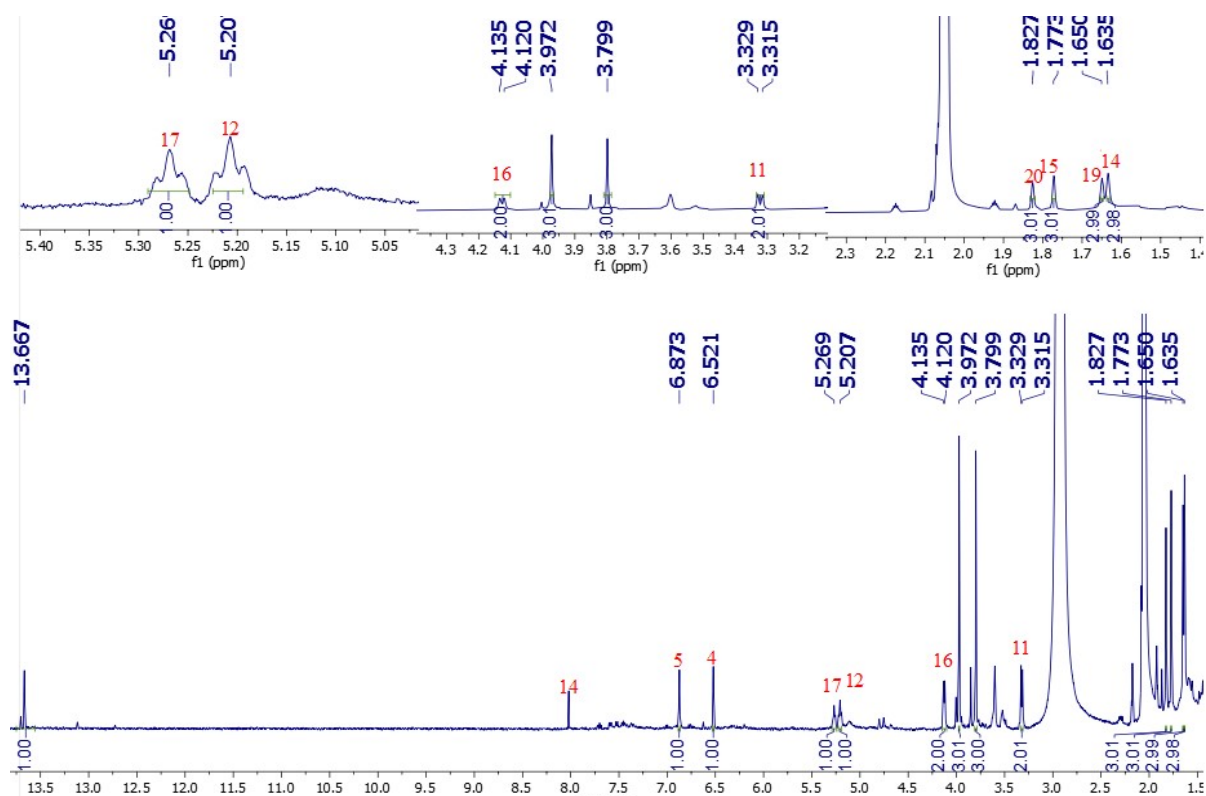

Figure S7A. The  $^1\text{H}$  NMR spectrum of **7** in acetone- $d_6$ .

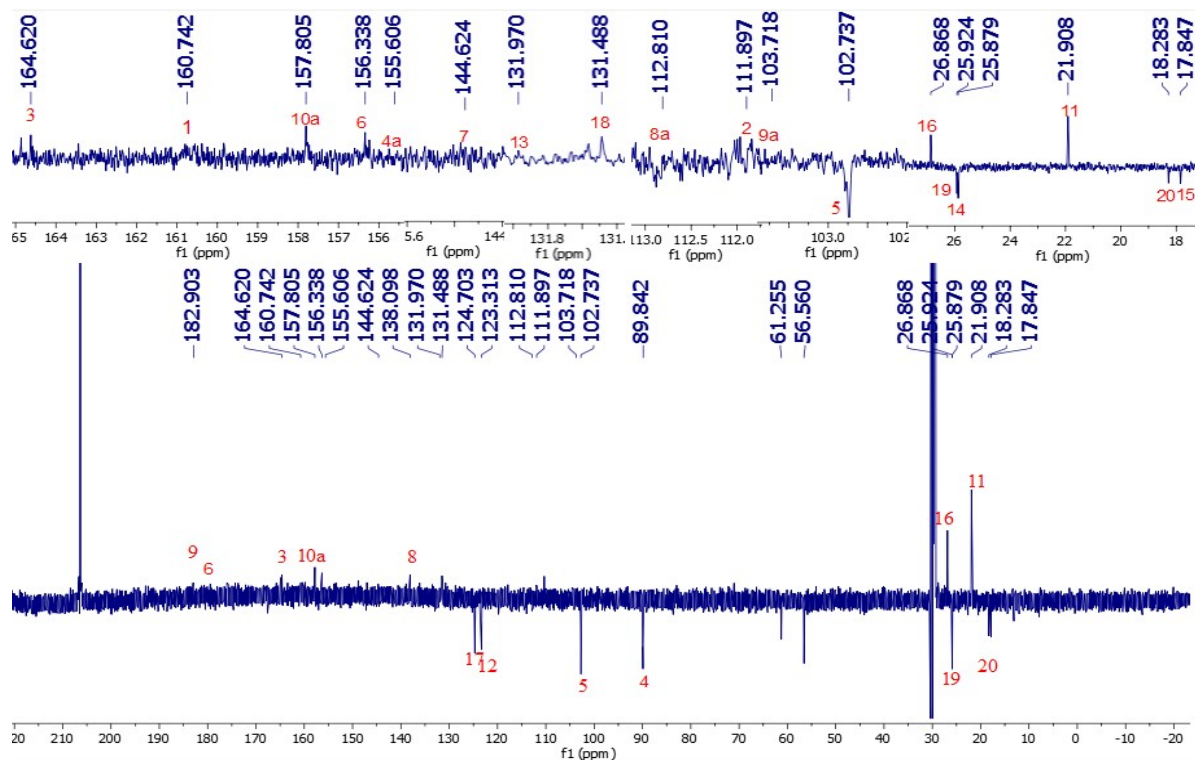

Figure S7B. The  $^{13}\text{C}$  NMR spectrum of **7** in acetone- $d_6$ .

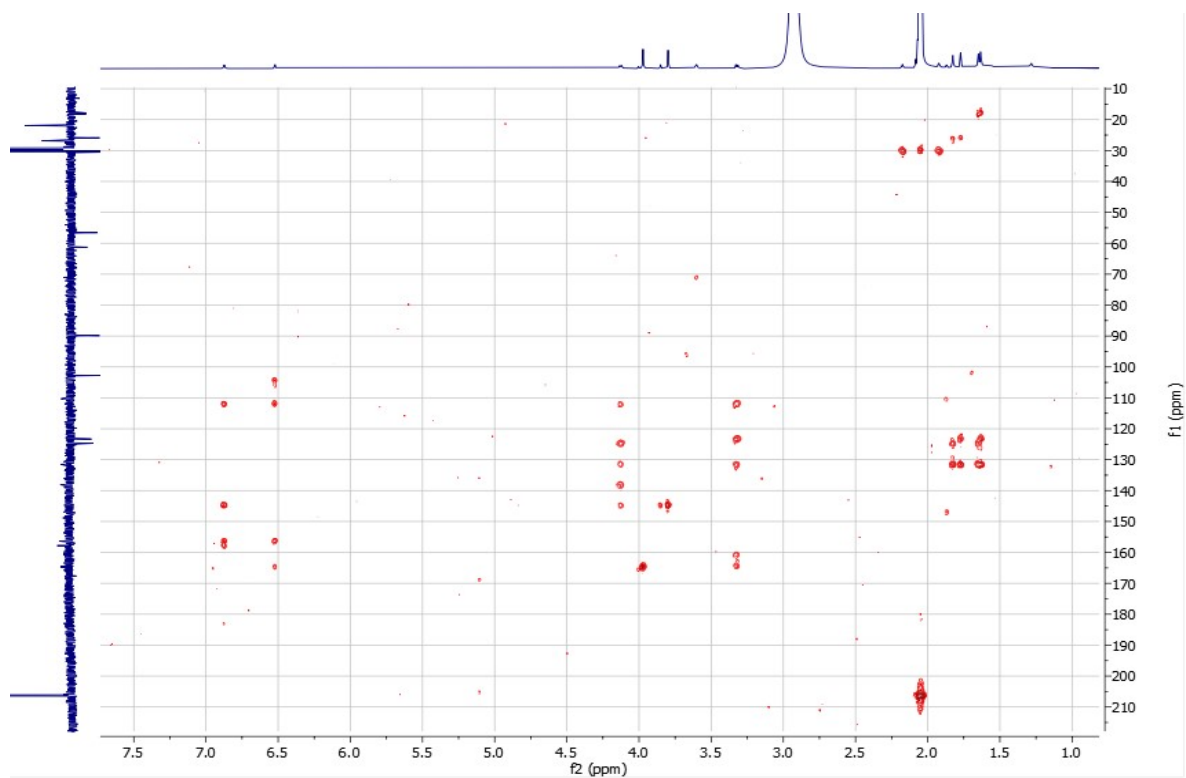

Figure S7C. The HMBC spectrum of **7** in acetone- $d_6$ .

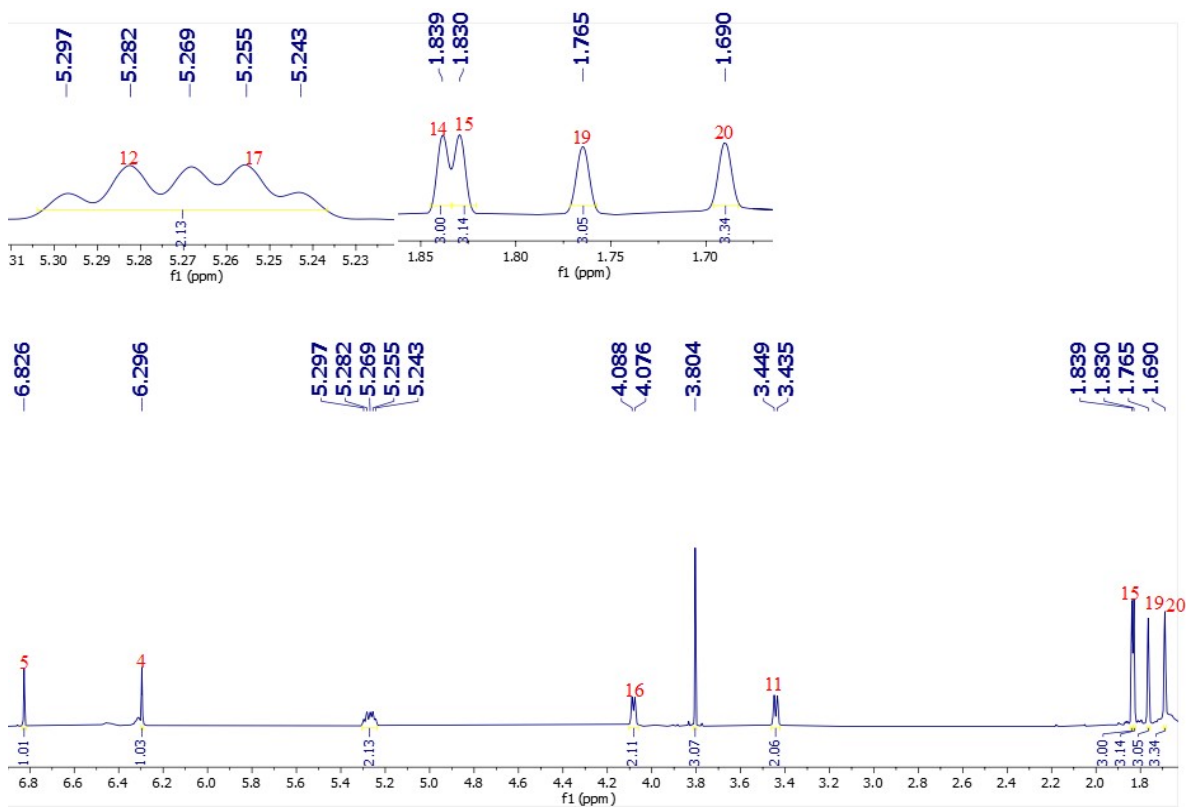

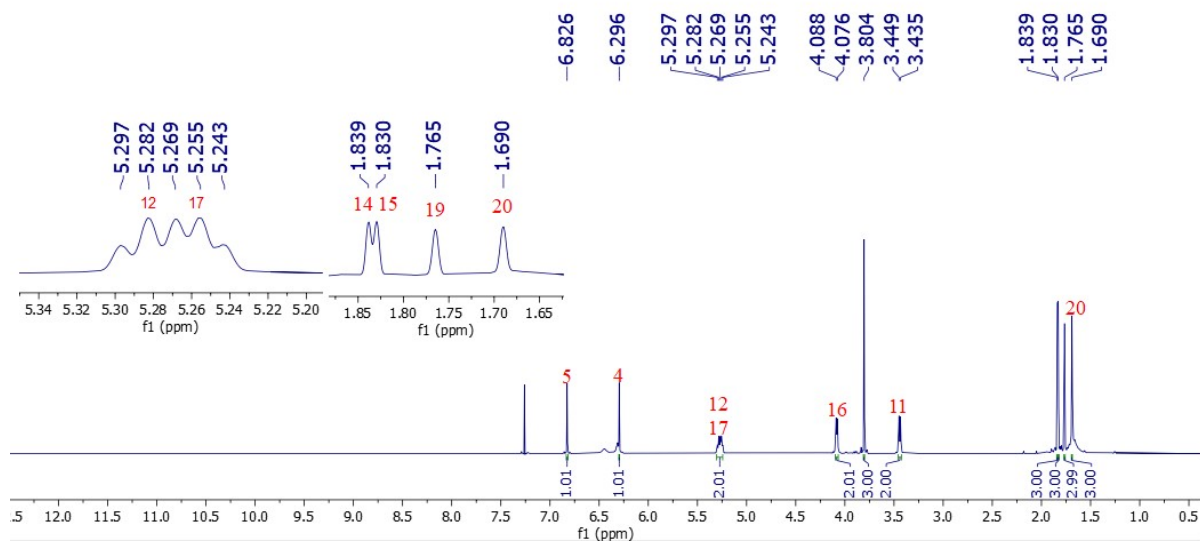

**Figure S8A.** The  $^1\text{H}$  NMR spectrum of **8** in  $\text{CDCl}_3$ .

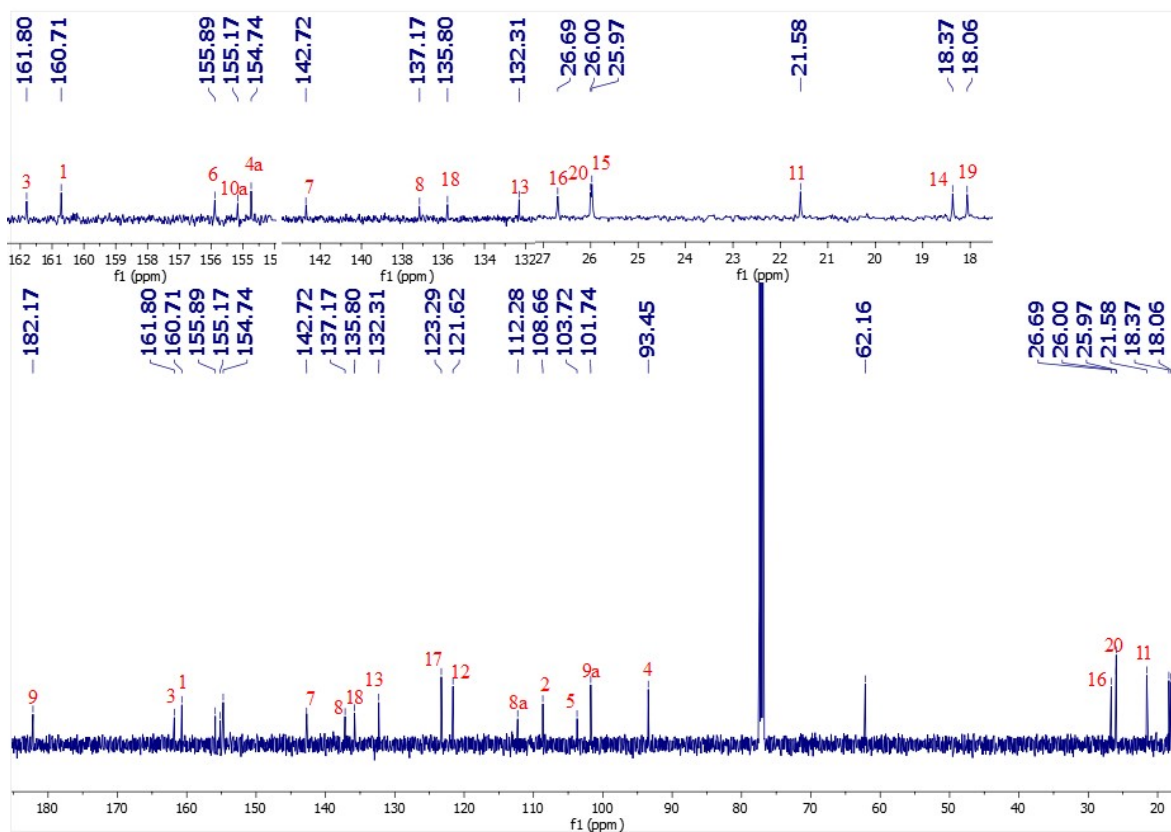

**Figure S8B.** The  $^{13}\text{C}$  NMR spectrum of **8** in  $\text{CDCl}_3$ .

Qualitative Analysis Report

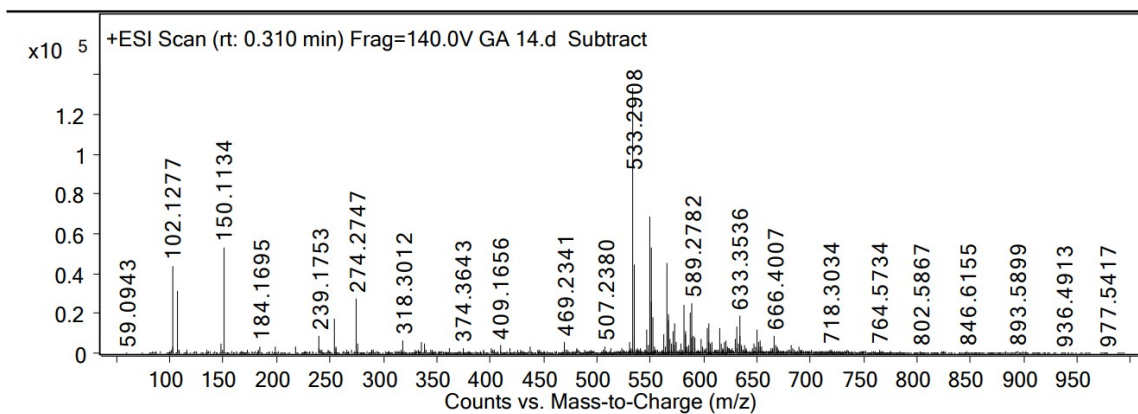

Figure S9A. The HRESIMS spectrum of **9**.

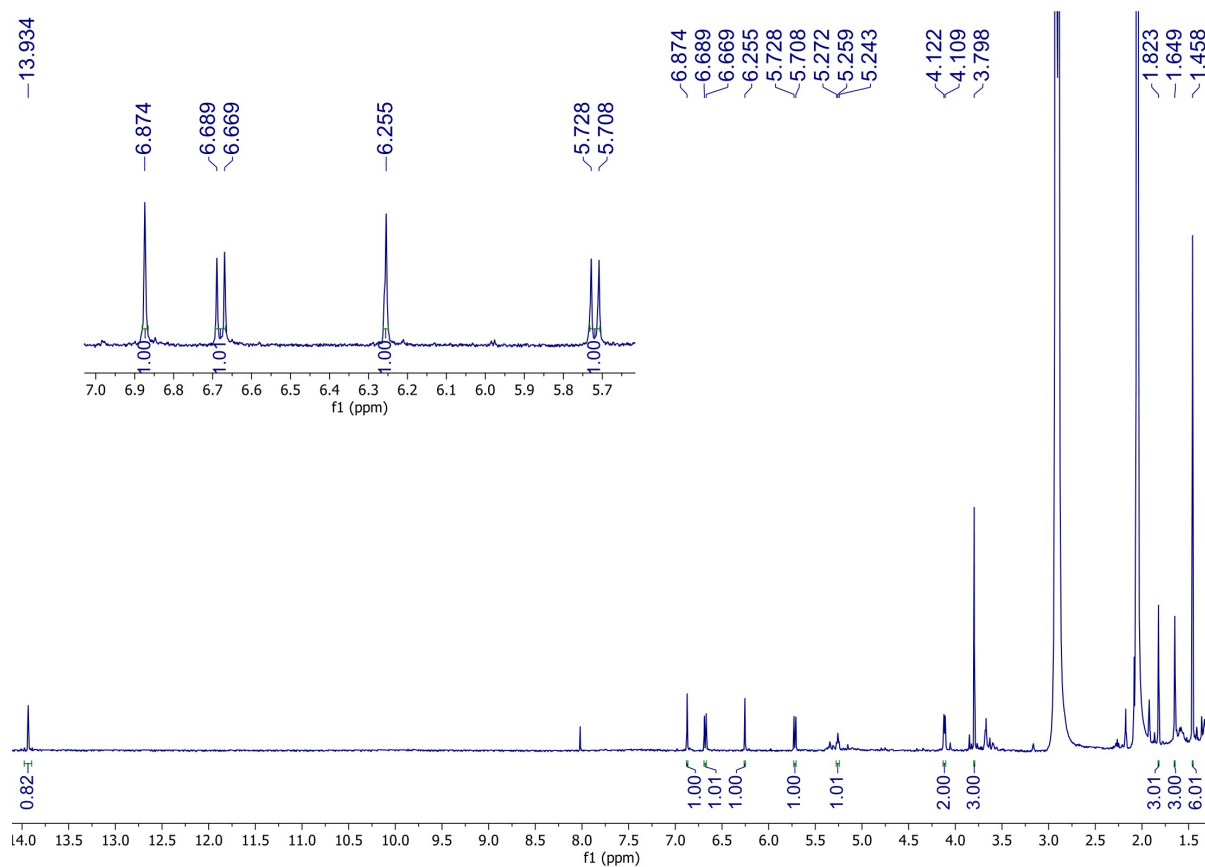

Figure S9B. The <sup>1</sup>H NMR spectrum of **9** in acetone-*d*<sub>6</sub>.

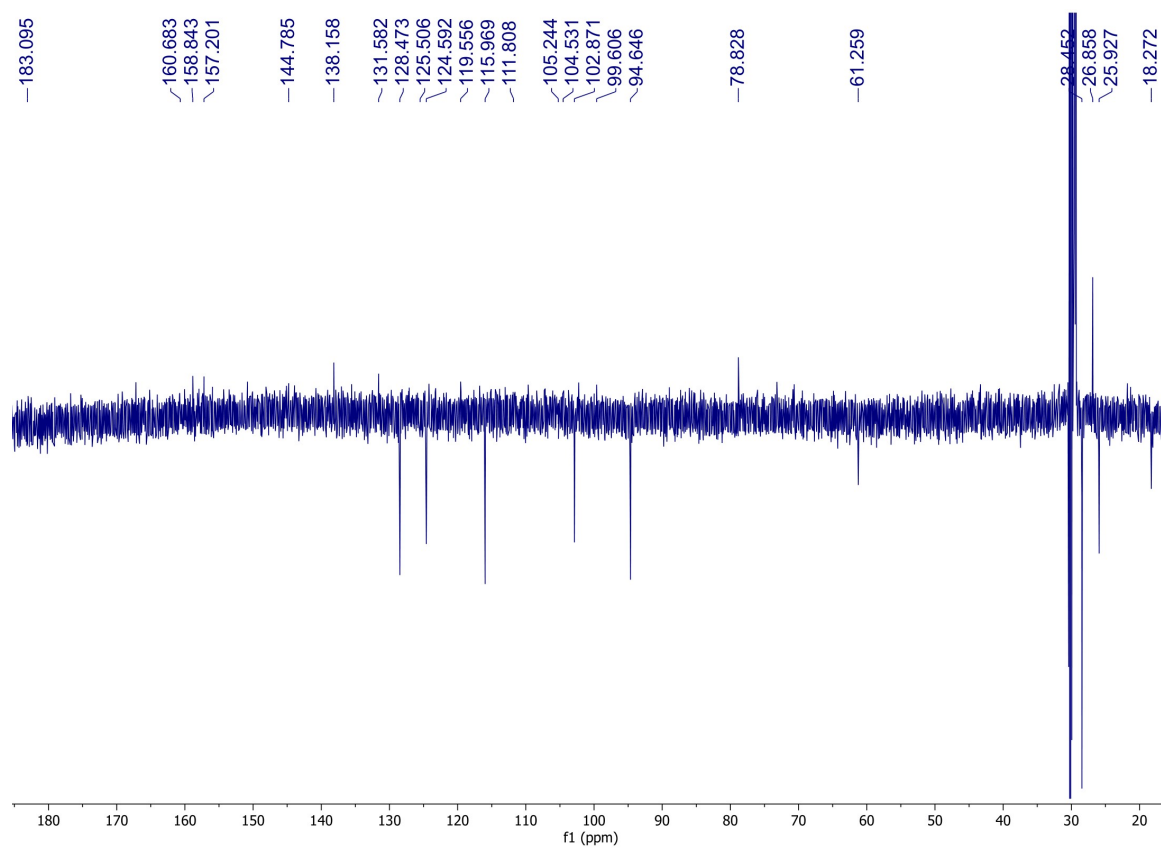

**Figure S9C.** The JMOD spectrum of **9** in acetone- $d_6$ .

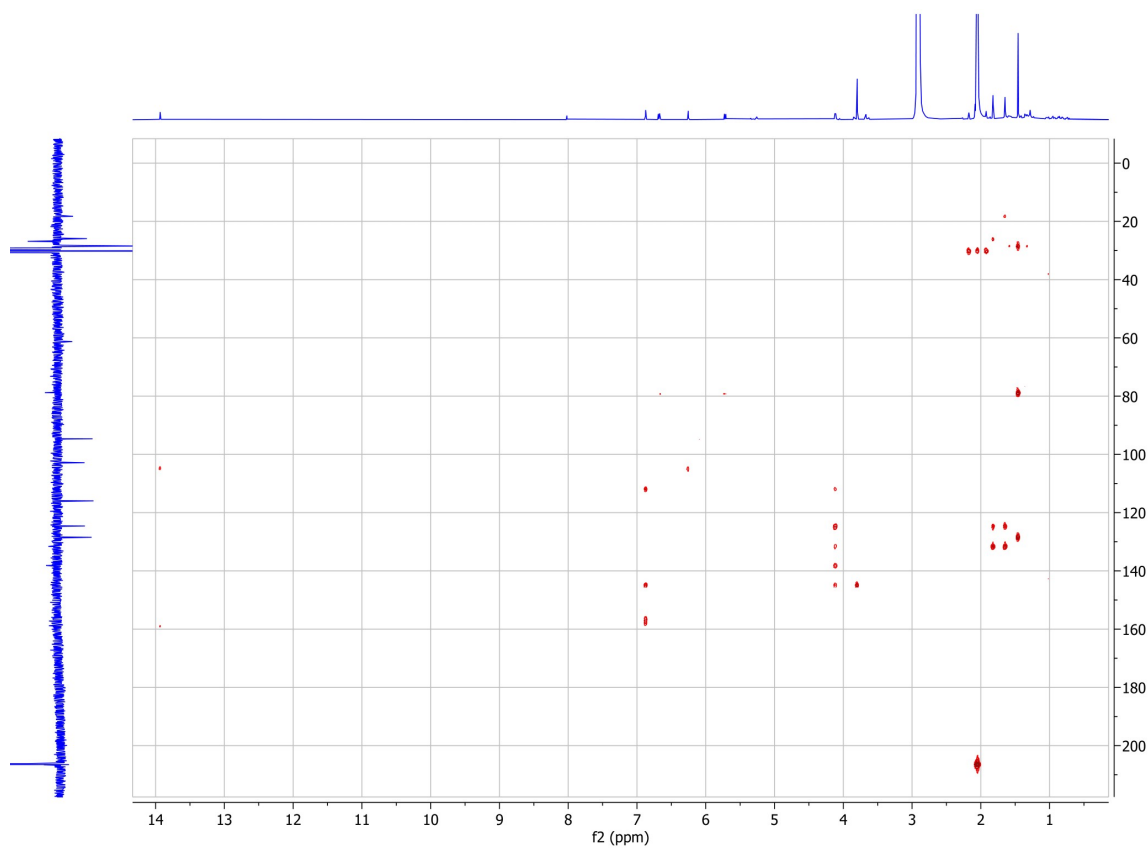

**Figure S9D.** The HMBC spectrum of **9** in acetone- $d_6$ .

Qualitative Analysis Report

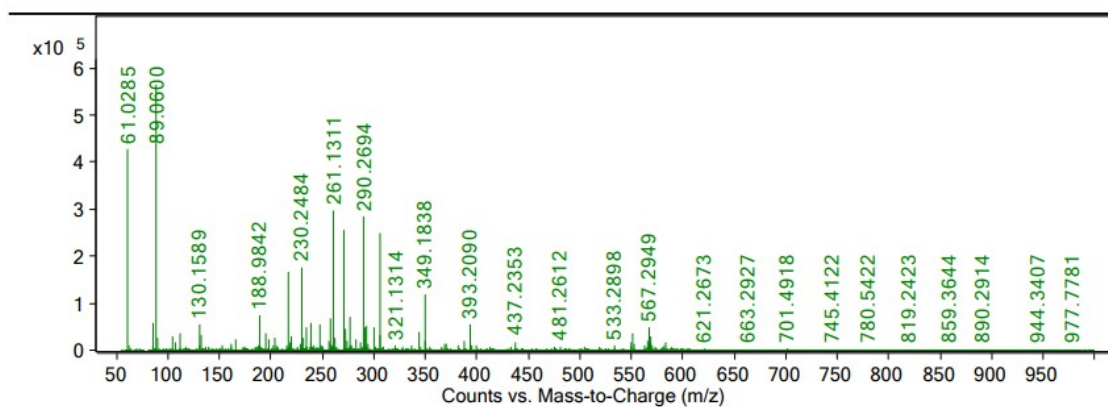

|          |   |         |
|----------|---|---------|
| 494.3509 |   | 355.37  |
| 494.564  |   | 205.74  |
| 494.9647 |   | 281.74  |
| 495.055  |   | 371.22  |
| 495.1592 |   | 580.25  |
| 495.1965 |   | 994.42  |
| 495.2352 | 1 | 1494.97 |
| 495.2965 |   | 602.13  |
| 495.4555 | 2 | 303.1   |
| 495.4863 |   | 332.25  |
| 495.5369 |   | 216.25  |
| 495.7124 |   | 232.95  |
| 495.8749 |   | 202.86  |
| 495.9645 | 2 | 236.01  |
| 496.1195 |   | 200.75  |
| 496.1633 |   | 541.26  |
| 496.2064 |   | 784.31  |
| 496.2439 | 1 | 759.11  |
| 496.307  |   | 429.56  |
| 496.3364 | 2 | 297.27  |
| 496.4195 |   | 242.72  |
| 496.4933 |   | 340.88  |
| 496.5826 |   | 232.44  |

Figure S10A. The HRESIMS spectrum of 10.



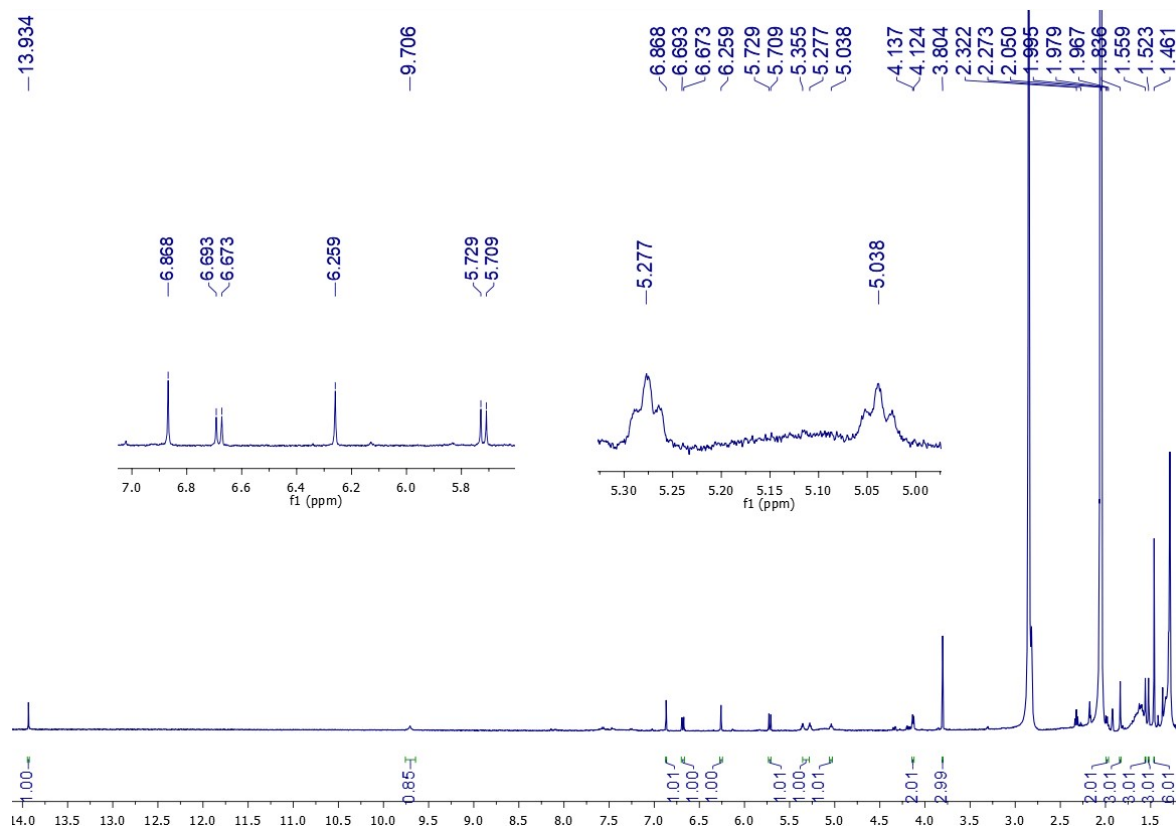

**Figure S10B.** The  $^1\text{H}$  NMR spectrum of **10** in acetone- $d_6$ .

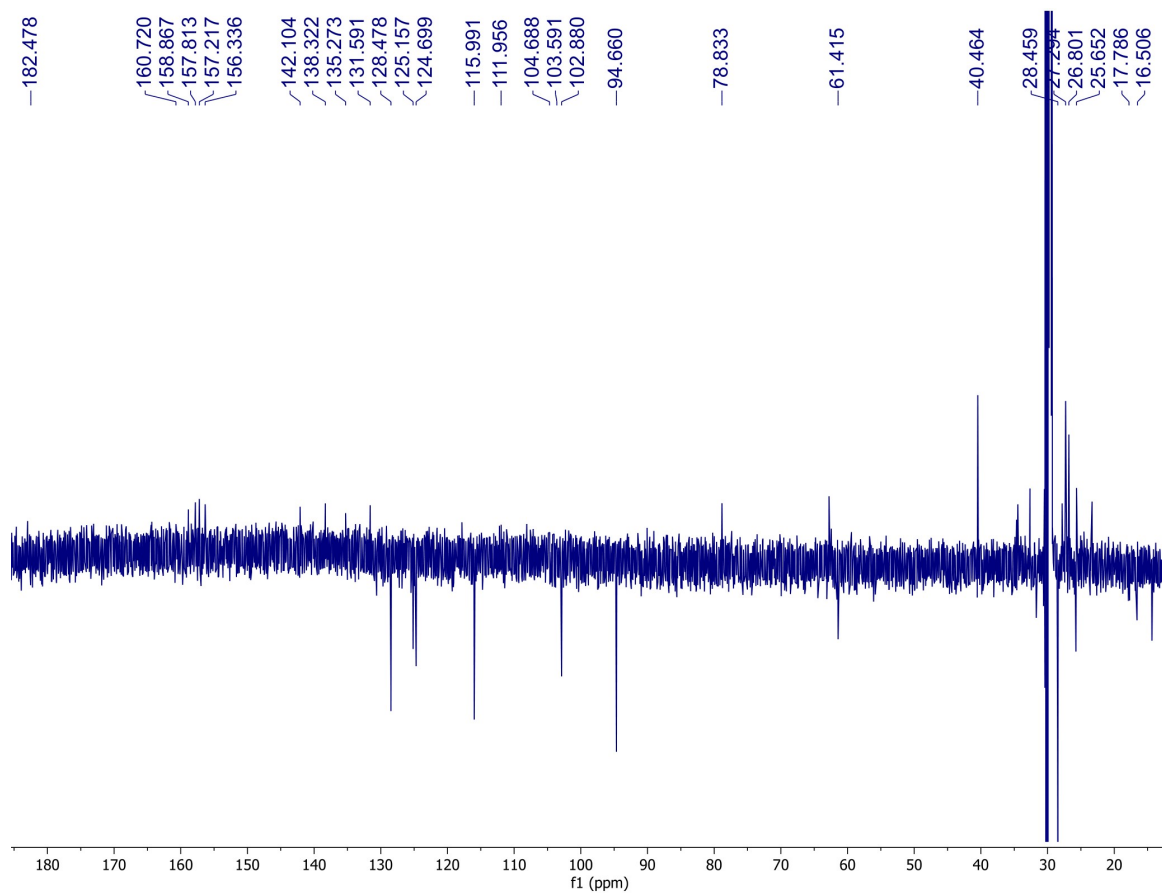

**Figure S10C.** The JMOD spectrum of **10** in acetone- $d_6$ .

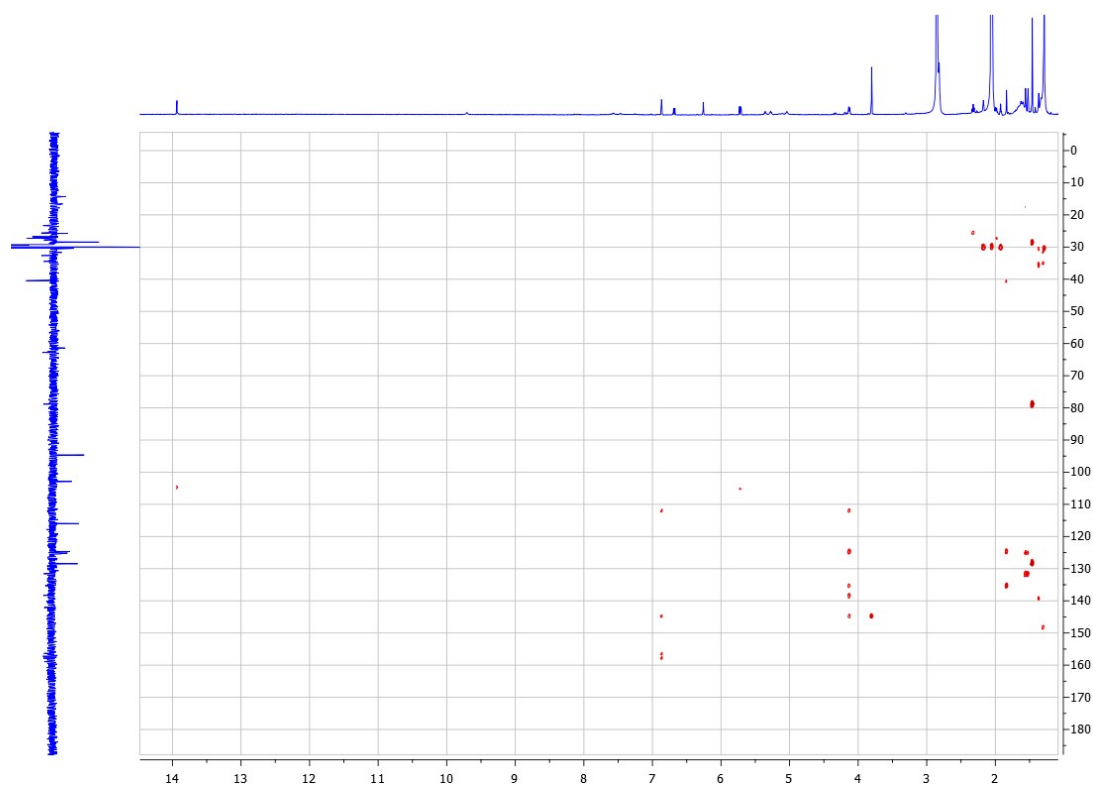

**Figure S10D.** The HMBC spectrum of **10** in acetone- $d_6$ .

Qualitative Analysis Report

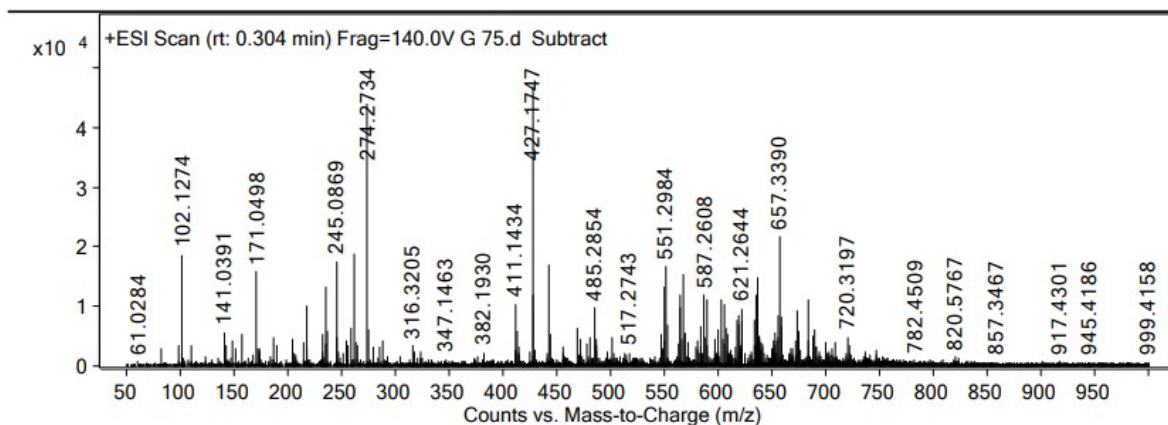

Figure S11A. The HRESIMS spectrum of **11**.

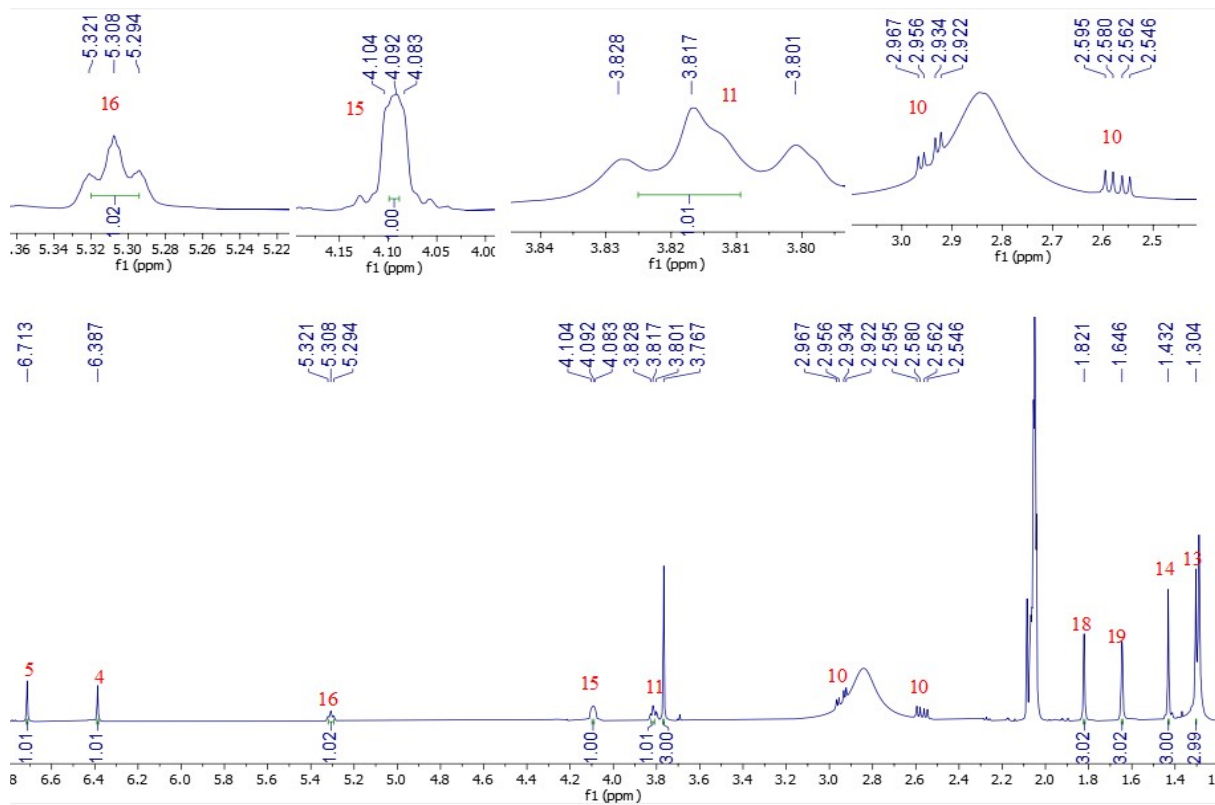

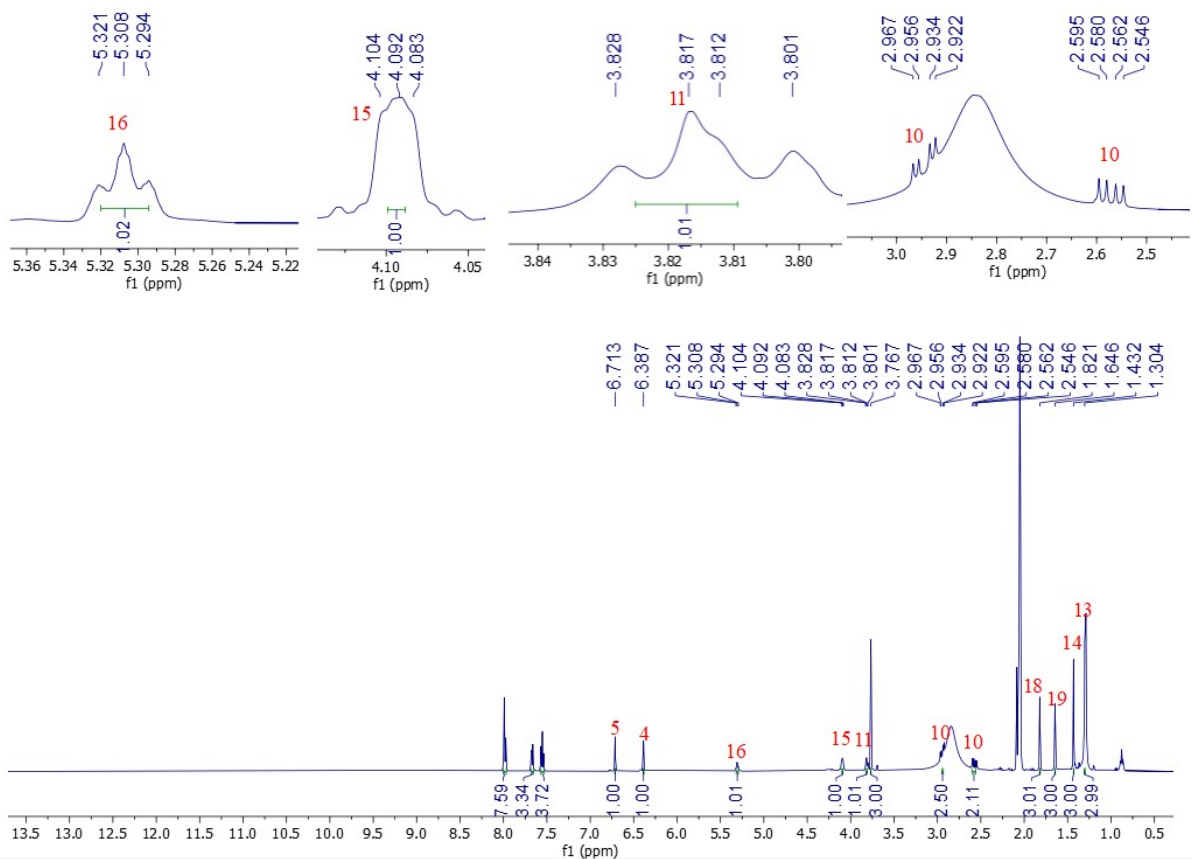

Figure S11B. The  $^1\text{H}$  NMR spectrum of **11** in acetone- $d_6$ .

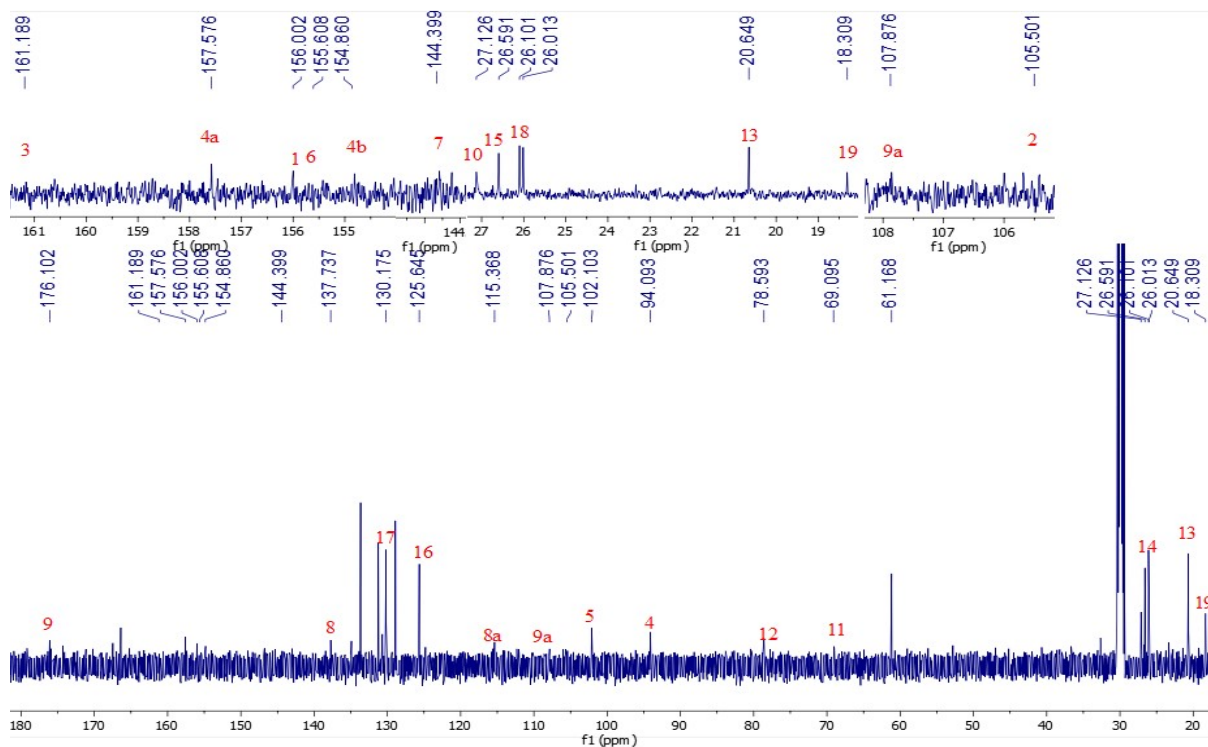

Figure S11C. The  $^{13}\text{C}$  NMR spectrum of **11** in acetone- $d_6$ .

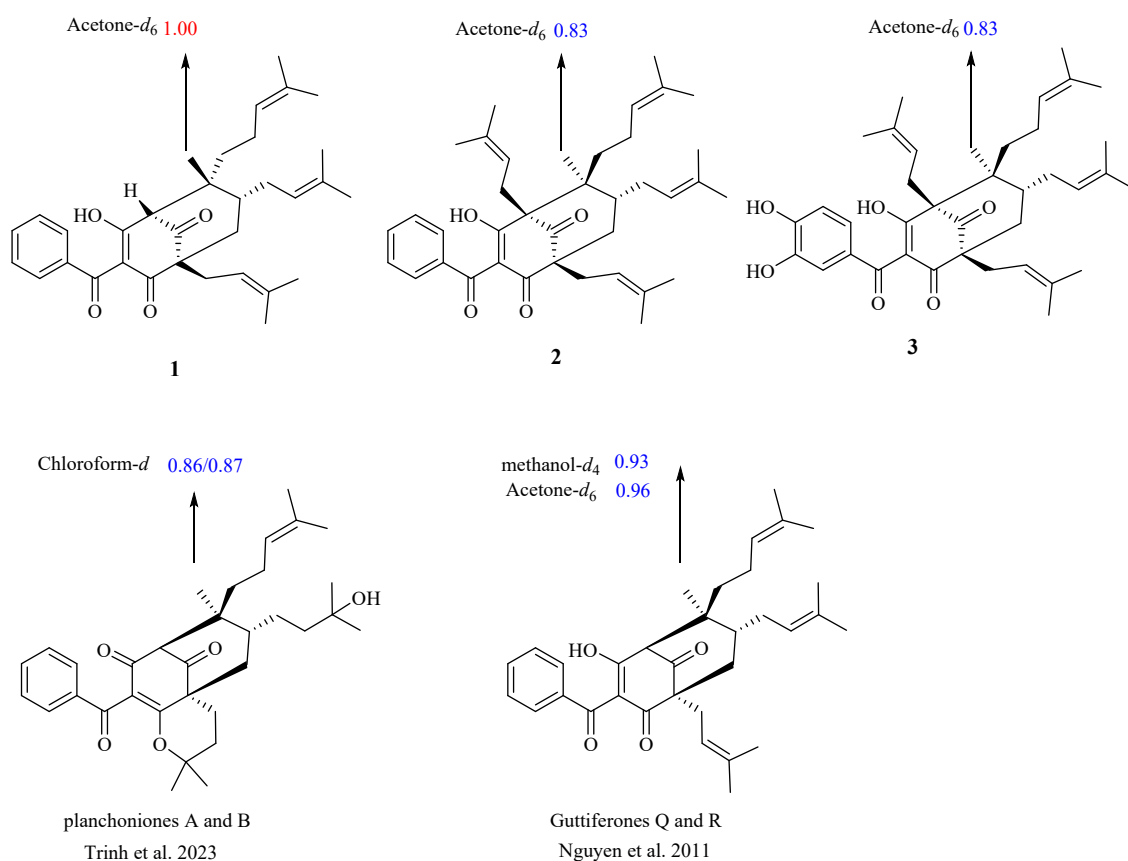

**Figure S12.** The chemical shifts of the characteristic methyl group of benzoylphloroglucinols 1-3, planchoniones A and B, guttiferones Q and R.

#### Refs:

X.-T. Yan, Z. An, Y. Huangfu, et al. Polycyclic polyprenylated acylphloroglucinol and phenolic metabolites from the aerial parts of *Hypericum elatoides* and their neuroprotective and anti-neuroinflammatory activities. *Phytochemistry* 2019, 159, 65–74.

H.D. Nguyen, B.T.D. Trinh, L.-H.D. Nguyen. Guttiferones Q-S, cytotoxic polyisoprenylated benzophenones from the pericarp of *Garcinia cochinchinensis*. *Phytochemistry Letters* 2011, 4 (2), 129–133.

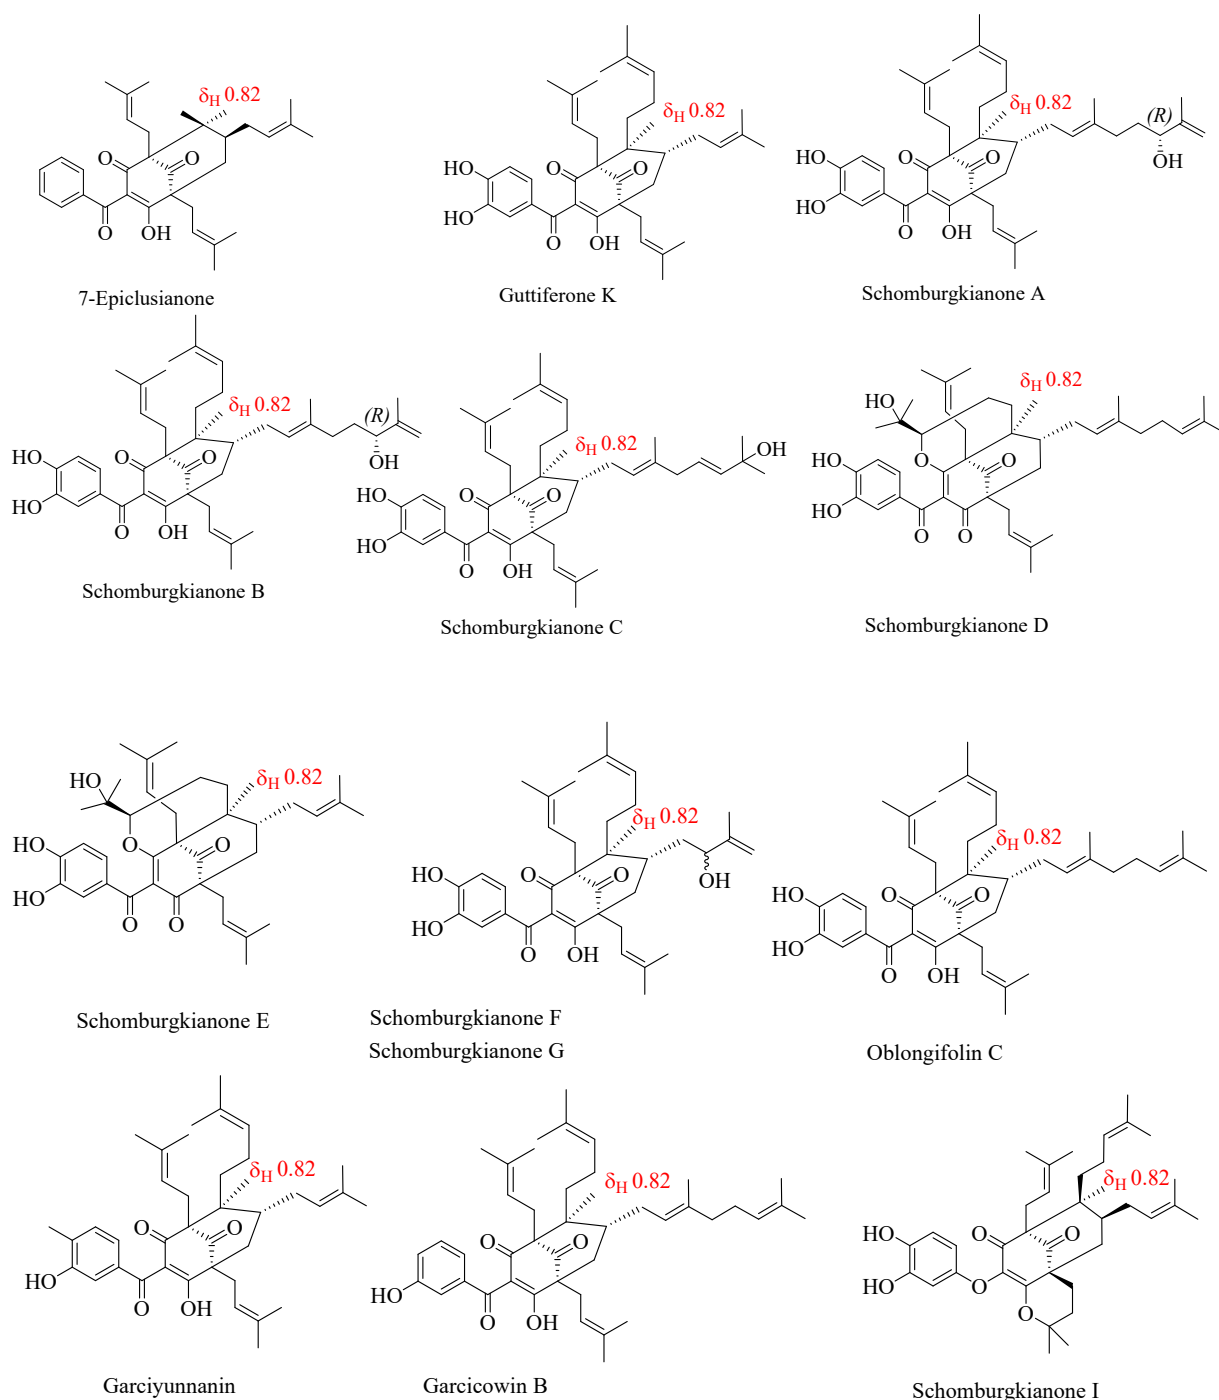

**Figure S13.** The chemical shifts of the characteristic methyl group of benzoylphloroglucinols from Vietnamese *G. schomburgkiana* fruits.

D.H. Le, K. Nishimura, Y. Takenaka, Y. Mizushima, T. Tanahashi. Polyprenylated Benzoylphloroglucinols with DNA Polymerase Inhibitory Activity from the Fruits of *Garcinia schomburgkiana*. *J. Nat. Prod.* 2016, 79 (7), 1798–1807.

H.T. Nguyen, T.-T. Nguyen, T.-H. Duong, et al.  $\alpha$ -Glucosidase Inhibitory and Antimicrobial Benzoylphloroglucinols from *Garcinia schomburgkiana* Fruits: In Vitro and In Silico Studies. *Molecules* 2022, 27 (8), 2574.

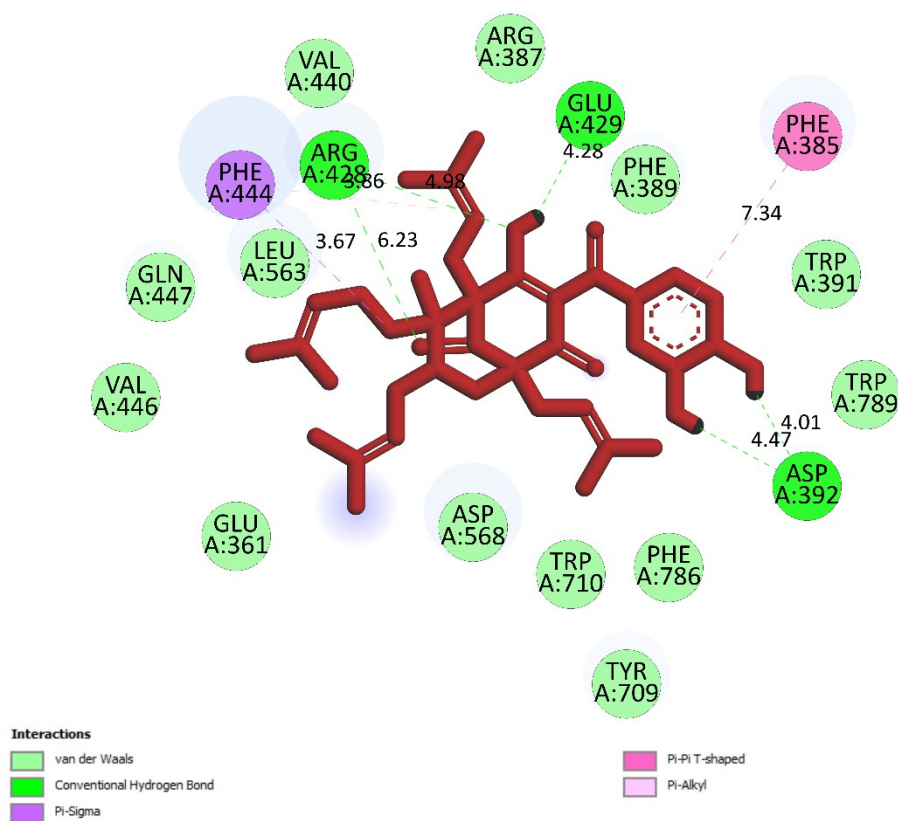

**Figure S14.** one 2D diagram indicated the significant ligand interactions between pose 82/ compound 3 and residual amino acid on 4J5T enzyme.

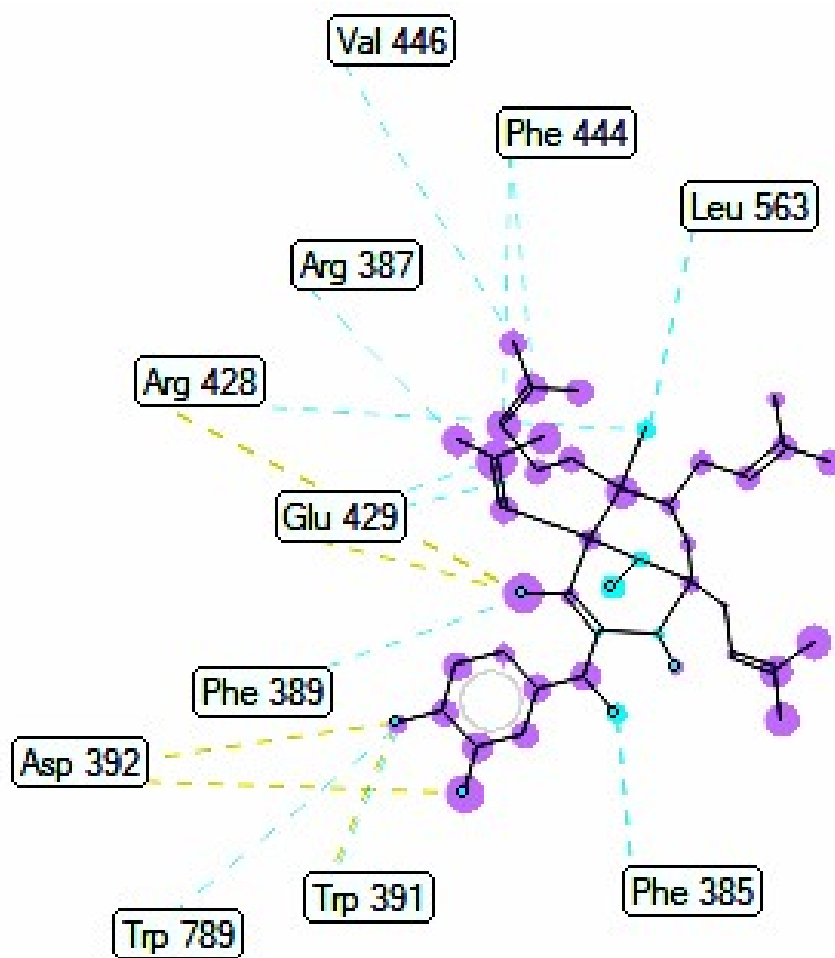

**Figure S15.** One ligand map indicated the secondary interactions between pose 82/compound 3 and 4J5T enzyme.



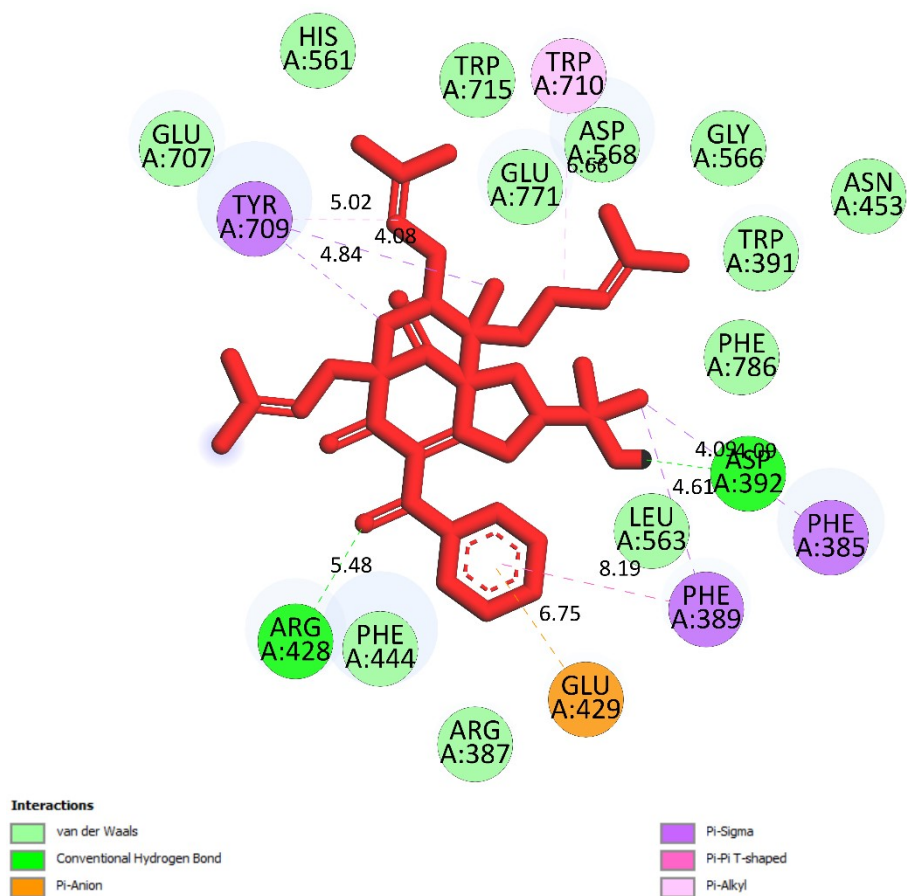

**Figure S16.** One diagram showed the significant ligand interactions between pose 332/compound 4 and 4J5T enzyme.

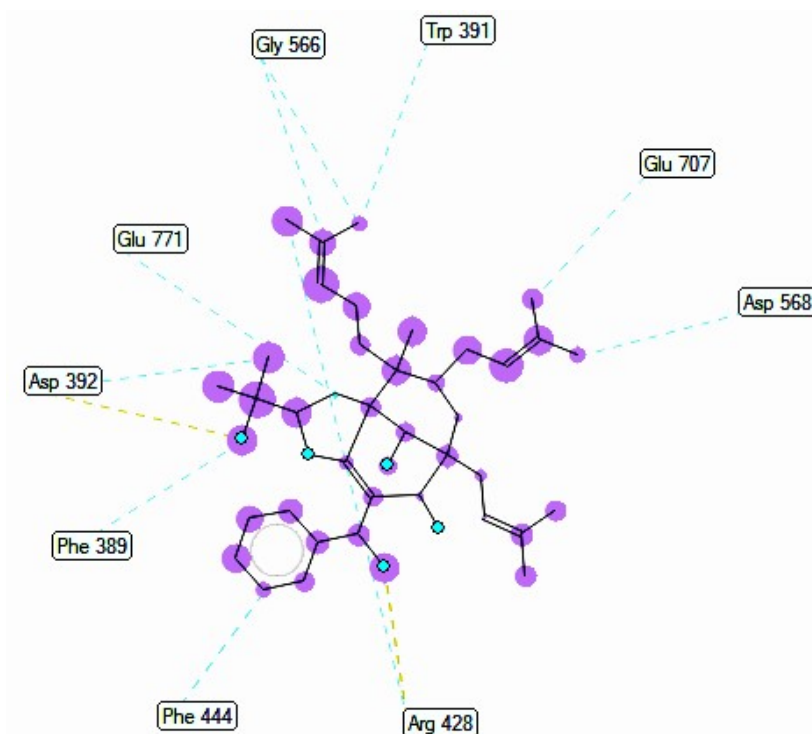

**Figure S17.** One ligand map showed the secondary interactions between pose 332/compound 4 and 4J5T enzyme.

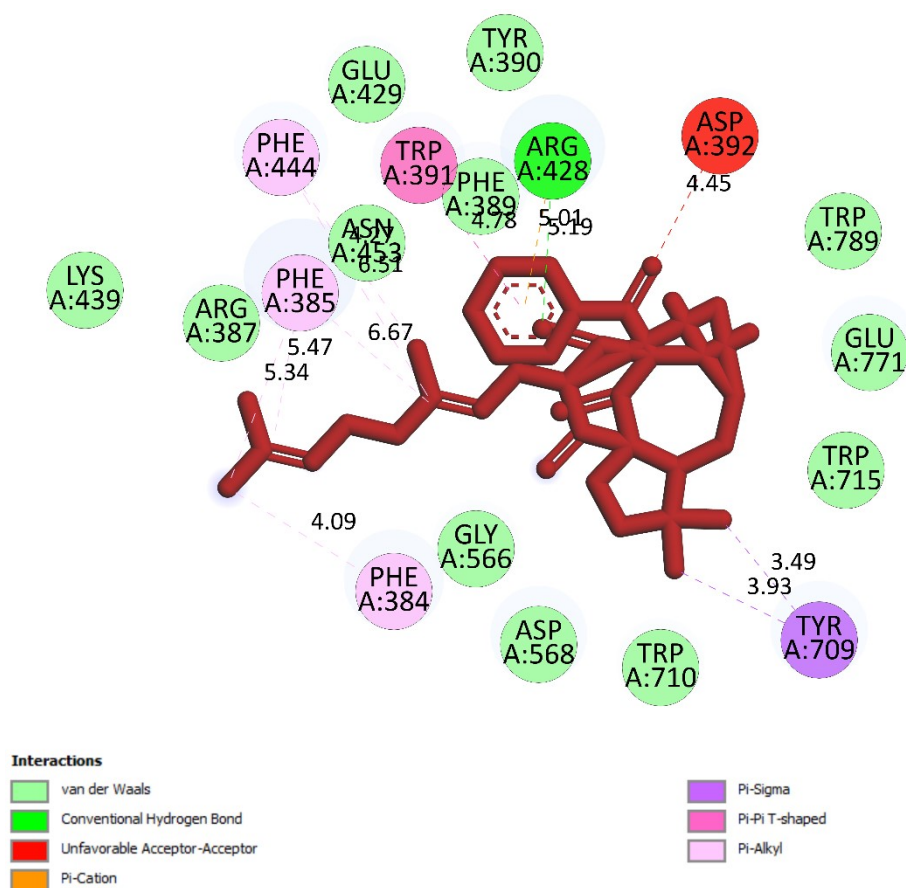

**Figure S18.** One diagram showed the significant ligand interactions between pose 160/compound 5 and 4J5T enzyme.

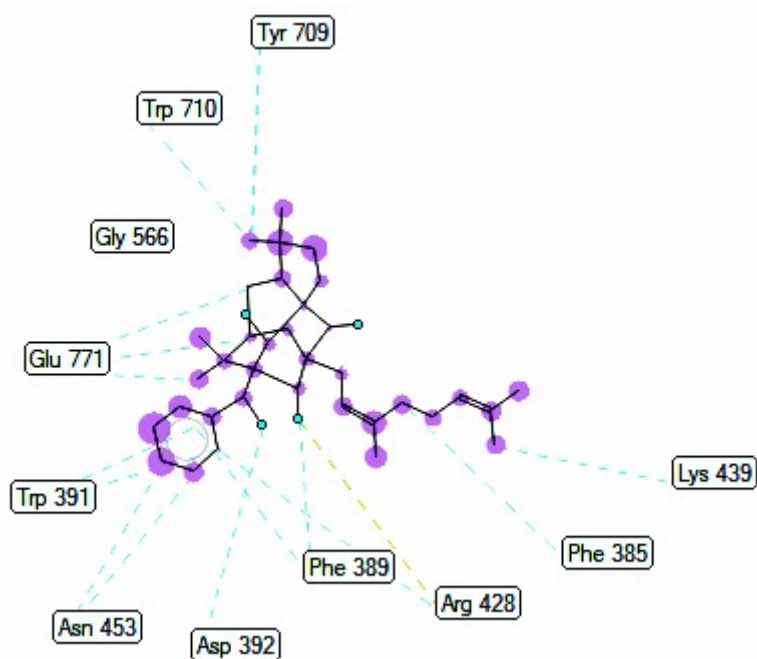

**Figure S19.** One ligand map showed the secondary interactions between pose 160/compound 5 and 4J5T enzyme.

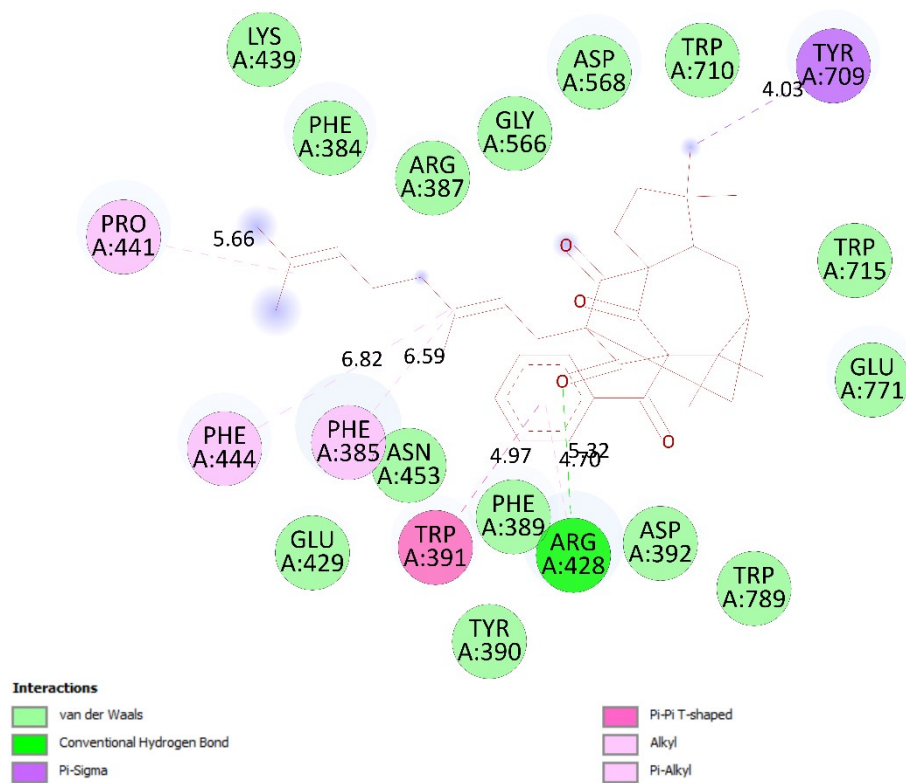

**Figure S20.** One diagram showed the significant ligand interactions between pose 489/compound 7 and 4J5T enzyme.

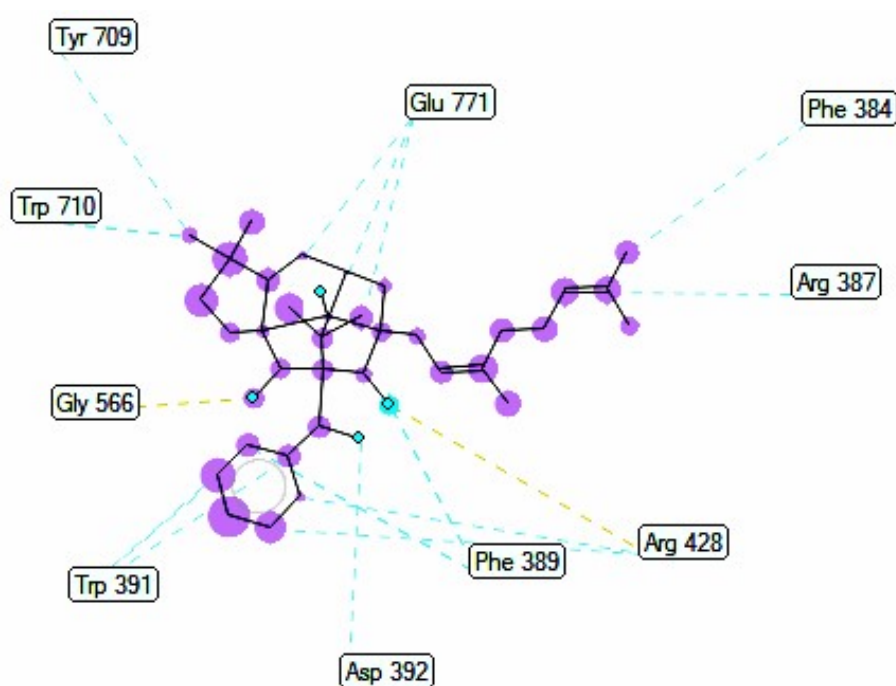

**Figure S21.** One ligand map showed the secondary interactions between pose 489/compound 7 and 4J5T enzyme.
